# Supplementary material
Source: PubMed Central journal article supplement (PMC4803436)

SUPPORTING INFORMATION

**Nickel-Catalyzed Allylic Alkylation with Diarylmethane Pronucleophiles:  
Development and Mechanistic Insight**

Sheng-Chun Sha, Hui Jiang, Jianyou Mao, Ana Bellomo, Soo A Jeong and Patrick J. Walsh\*

*Roy and Diana Vagelos Laboratories, Penn/Merck Laboratory for High-Throughput Experimentation,  
Department of Chemistry, University of Pennsylvania, 231 South 34th Street, Philadelphia, Pennsylvania  
19104-6323, United States*

[pwalsh@sas.upenn.edu](mailto:pwalsh@sas.upenn.edu)

**General Methods.** All reactions were performed under nitrogen using oven-dried glassware and standard Schlenk or vacuum line techniques. Air- and moisture-sensitive solutions were handled under nitrogen and transferred via syringe. The solvent (DME) was sparged for 20 min with dry N<sub>2</sub> and dried using a commercial two-column solvent purification system comprising columns packed with neutral alumina. Unless otherwise stated, reagents were commercially available and used as purchased without further purification. Chemicals were obtained from Sigma-Aldrich, Acros, TCI America, Strem Chemicals or Matrix Scientific, and solvents were purchased from Fisher Scientific. The progress of the reactions was monitored by thin-layer chromatography using Whatman Partisil K6F 250 μm precoated 60 Å silica gel plates and visualized by short-wavelength ultraviolet light as well as by treatment potassium permanganate (KMnO<sub>4</sub>) stain or iodine. Silica gel (230–400 mesh, Silicycle) was used for flash chromatography. The <sup>1</sup>H NMR and <sup>13</sup>C{<sup>1</sup>H} NMR spectra were obtained using a Brüker AM-500 Fourier transform NMR spectrometer at 500 and 126 MHz, respectively. Chemical shifts are reported in units of parts per million (ppm) downfield from tetramethylsilane (TMS), and all coupling constants are reported in hertz. The infrared spectra were obtained with KBr plates using a Perkin-Elmer Spectrum 100 Series FTIR spectrometer. High-resolution mass spectrometry (HRMS) data were obtained on a Waters LC-TOF mass spectrometer (model LCT-XE Premier) using chemical ionization (CI) or electrospray ionization (ESI) in positive or negative mode, depending on the analyte. Melting points were determined on a Unimelt Thomas-Hoover melting point apparatus and are uncorrected.

#### **Preparation of Diarylmethanes.**

Compounds **4d**<sup>1</sup>, **4e**<sup>2</sup>, **7b**<sup>3</sup> were prepared according to literature procedures.

#### **Preparation of Allylic Electrophiles.**

Compounds **2a**<sup>4</sup>, **2b**<sup>5</sup>, **2c**<sup>6</sup> were prepared according to literature procedures.

**General Procedure A:** An oven-dried 10 mL reaction vial equipped with a stir bar was charged with KN(SiMe<sub>3</sub>)<sub>2</sub> (100 mg, 0.50 mmol, 5 equiv) under a nitrogen atmosphere. A solution (from a stock solution) of Ni(COD)<sub>2</sub> (2.06 mg, 0.0075 mmol) and DPPF (8.31 mg, 0.015 mmol) in 1 mL of dry DME was taken up by syringe and added to the reaction vial. After stirring for 5 min at 24 °C, diphenylmethane (**1a**) (17 μL,

0.1 mmol, 1 equiv) was added to the reaction mixture followed by allylOBoc (**2a**) (51  $\mu\text{L}$ , 0.3 mmol, 3 equiv). Note that the diarylmethanes or allylic OBoc in a solid form was added to the reaction vial prior to  $\text{KN}(\text{SiMe}_3)_2$ . The reaction mixture was stirred for 12 h at 24  $^\circ\text{C}$ , quenched with two drops of  $\text{H}_2\text{O}$ , diluted with 3 mL of ethyl acetate, and filtered over a pad of  $\text{MgSO}_4$  and silica. The pad was rinsed with additional 7 mL of ethyl acetate, and the solution was concentrated *in vacuo*. The crude material was loaded onto a silica gel column and purified by flash chromatography eluting with EtOAc/hexanes.

**General Procedure B:** An oven-dried 10 mL reaction vial equipped with a stir bar was charged with  $\text{NaN}(\text{SiMe}_3)_2$  (55 mg, 0.30 mmol, 3 equiv) under a nitrogen atmosphere. A solution (from a stock solution) of  $\text{Ni}(\text{COD})_2$  (1.37 mg, 0.005 mmol) and DPPF (5.54 mg, 0.010 mmol) in 1 mL of dry DME was taken up by syringe and added to the reaction vial. After stirring for 5 min at 24  $^\circ\text{C}$ , 2-benzylpyridine (**4a**) (16  $\mu\text{L}$ , 0.1 mmol, 1 equiv) was added to the reaction mixture followed by allylOBoc (**2a**) (20.4  $\mu\text{L}$ , 0.12 mmol, 1.2 equiv). Note that the diarylmethanes or allylic OBoc in a solid form was added to the reaction vial prior to  $\text{NaN}(\text{SiMe}_3)_2$ . The reaction mixture was stirred for 12 h at 24  $^\circ\text{C}$ , quenched with two drops of  $\text{H}_2\text{O}$ , diluted with 3 mL of ethyl acetate, and filtered over a pad of  $\text{MgSO}_4$  and silica. The pad was rinsed with additional 7 mL of ethyl acetate, and the solution was concentrated *in vacuo*. The crude material was loaded onto a silica gel column and purified by flash chromatography eluting with EtOAc/hexanes.

**General Procedure C:** An oven-dried 10 mL reaction vial equipped with a stir bar was charged with  $\text{NaN}(\text{SiMe}_3)_2$  (55 mg, 0.30 mmol, 3 equiv) under a nitrogen atmosphere. A solution (from a stock solution) of  $\text{Ni}(\text{COD})_2$  (1.37 mg, 0.005 mmol) and enantioenriched phosphine ligand **L1** (3.65 mg, 0.005 mmol) in 1 mL of dry DME was taken up by syringe and added to the reaction vial. After stirring for 5 min at 24  $^\circ\text{C}$ , di(pyridin-3-yl)methane (**4d**) (17 mg, 0.1 mmol, 1 equiv) was added to the reaction mixture followed by cyclohexenyl OBoc (**2b**) (40  $\mu\text{L}$ , 0.2 mmol, 2 equiv). Note that the di(pyridin-3-yl)methane (**4d**) or *tert*-butyl ((1*S*,3*S*)-1,2,3,6-tetrahydro-[1,1'-biphenyl]-3-yl) carbonate (**2c**) was added to the reaction vial prior to  $\text{NaN}(\text{SiMe}_3)_2$ . The reaction mixture was stirred for 12 h at 0  $^\circ\text{C}$ , quenched with two drops of  $\text{H}_2\text{O}$ , diluted with 3 mL of ethyl acetate, and filtered over a pad of  $\text{MgSO}_4$  and silica. The pad was rinsed with additional 7 mL of ethyl acetate, and the solution was concentrated *in vacuo*. The crude material was loaded onto a silica gel column and purified by flash chromatography eluting with EtOAc/hexanes.

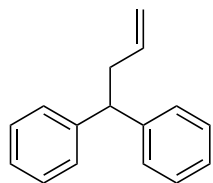

**But-3-ene-1,1-diyl dibenzene (3aa):** The reaction was performed following General Procedure A with diphenylmethane (**1a**) (17  $\mu$ L, 0.1 mmol),  $\text{KN}(\text{SiMe}_3)_2$  (100 mg, 0.50 mmol) and allylOBoc (**2a**) (51  $\mu$ L, 0.3 mmol). The crude material was purified by flash chromatography on silica gel (eluted with hexanes) to give the product (18.3 mg, 88% yield) as a colorless oil.  $R_f = 0.25$  (hexanes); The NMR spectral data match the previously published data.<sup>7</sup>

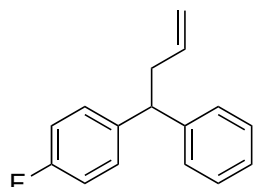

**1-Fluoro-4-(1-phenylbut-3-en-1-yl)benzene (3ba):** The reaction was performed following General Procedure A with 1-benzyl-4-fluorobenzene (**1b**) (17  $\mu$ L, 0.1 mmol),  $\text{KN}(\text{SiMe}_3)_2$  (80 mg, 0.40 mmol) and allylOBoc (**2a**) (51  $\mu$ L, 0.3 mmol). The crude material was purified by flash chromatography on silica gel (eluted with hexanes) to give the product (15.2 mg, 67% yield) as a colorless oil.  $R_f = 0.25$  (hexanes); The NMR spectral data match the previously published data.<sup>8</sup>

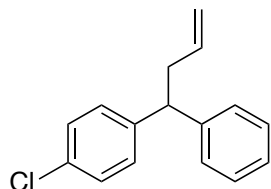

**1-Chloro-4-(1-phenylbut-3-en-1-yl)benzene (3ca):** The reaction was performed following General Procedure A with 1-benzyl-4-chlorobenzene (**1c**) (18  $\mu$ L, 0.1 mmol),  $\text{NaN}(\text{SiMe}_3)_2$  (91 mg, 0.50 mmol) and allylOBoc (**2a**) (51  $\mu$ L, 0.3 mmol). The crude material was purified by flash chromatography on silica gel (eluted with hexanes) to give the product (23.8 mg, 98% yield) as a colorless oil.  $R_f = 0.25$  (hexanes); The NMR spectral data match the previously published data.<sup>7</sup>

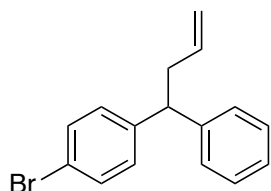

**1-Bromo-4-(1-phenylbut-3-en-1-yl)benzene (3da):** The reaction was performed following General Procedure A with 1-benzyl-4-bromobenzene (**1d**) (18.5  $\mu$ L, 0.1 mmol),  $\text{NaN}(\text{SiMe}_3)_2$  (91 mg, 0.50 mmol) and allylOBoc (**2a**) (51  $\mu$ L, 0.3 mmol). The crude material was purified by flash chromatography on silica gel (eluted with hexanes) to give the product (25.5 mg, 89% yield) as a colorless oil.  $R_f = 0.25$  (hexanes); The NMR spectral data match the previously published data.<sup>8</sup>

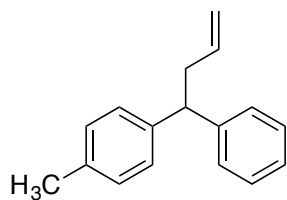

**1-Methyl-4-(1-phenylbut-3-en-1-yl)benzene (3ea):** The reaction was performed following General Procedure A with 1-benzyl-4-methylbenzene (**1e**) (18.5  $\mu\text{L}$ , 0.1 mmol),  $\text{KN}(\text{SiMe}_3)_2$  (100 mg, 0.50 mmol) and allylOBoc (**2a**) (51  $\mu\text{L}$ , 0.3 mmol). The crude material was purified by flash chromatography on silica gel (eluted with hexanes) to give the product (13.5 mg, 61% yield) as a colorless oil.  $R_f = 0.20$  (hexanes); The NMR spectral data match the previously published data.<sup>7</sup>

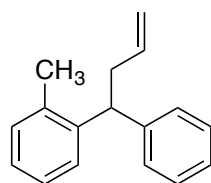

**1-Methyl-2-(1-phenylbut-3-en-1-yl)benzene (3fa):** The reaction was performed following General Procedure A with 1-benzyl-2-methylbenzene (**1f**) (18.5  $\mu\text{L}$ , 0.1 mmol),  $\text{KN}(\text{SiMe}_3)_2$  (100 mg, 0.50 mmol) and allylOBoc (**2a**) (51  $\mu\text{L}$ , 0.3 mmol). The crude material was purified by flash chromatography on silica gel (eluted with hexanes) to give the product (14.4 mg, 65% yield) as a colorless oil.  $R_f = 0.20$  (hexanes); The NMR spectral data match the previously published data.<sup>9</sup>

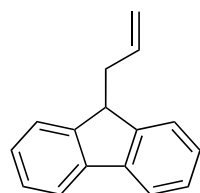

**9-Allyl-9H-fluorene (3ga):** The reaction was performed following General Procedure A with 9H-fluorene (**1g**) (16.7 mg, 0.1 mmol),  $\text{LiO}^t\text{Bu}$  (12 mg, 0.15 mmol) and allylOBoc (**2a**) (20.4  $\mu\text{L}$ , 0.12 mmol). The crude material was purified by flash chromatography on silica gel (eluted with hexanes) to give the product (17.1 mg, 83% yield) as a colorless oil.  $R_f = 0.20$  (hexanes); The NMR spectral data match the previously published data.<sup>10</sup>

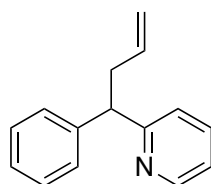

**2-(1-Phenylbut-3-en-1-yl)pyridine (5aa):** The reaction was performed following General Procedure B with 2-benzylpyridine (**4a**) (16  $\mu\text{L}$ , 0.1 mmol),  $\text{NaN}(\text{SiMe}_3)_2$  (36 mg, 0.20 mmol) and allylOBoc (**2a**) (20.4  $\mu\text{L}$ , 0.12 mmol). The crude material was purified by flash chromatography on silica gel (eluted with hexanes to EtOAc:hexanes = 10:90) to give the product (19 mg, 91% yield) as a yellow oil.  $R_f = 0.30$  (EtOAc:hexanes = 10:90); The NMR spectral data match the previously published data.<sup>8</sup>

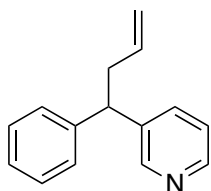

**3-(1-Phenylbut-3-en-1-yl)pyridine (5ba):** The reaction was performed following General Procedure B with 3-benzylpyridine (**4b**) (17 mg, 0.1 mmol),  $\text{NaN}(\text{SiMe}_3)_2$  (55 mg, 0.30 mmol) and allylOBoc (**2a**) (20.4  $\mu\text{L}$ , 0.12 mmol). The crude material was purified by flash chromatography on silica gel (eluted with hexanes to EtOAc:hexanes = 30:70) to give the product (19 mg, 91% yield) as a yellow oil.  $R_f = 0.40$  (EtOAc:hexanes = 40:60); The NMR spectral data match the previously published data.<sup>8</sup>

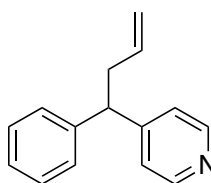

**4-(1-Phenylbut-3-en-1-yl)pyridine (5ca):** The reaction was performed following General Procedure B with 4-benzylpyridine (**4c**) (16  $\mu\text{L}$ , 0.1 mmol),  $\text{LiN}(\text{SiMe}_3)_2$  (34 mg, 0.20 mmol) and allylOBoc (**2a**) (20.4  $\mu\text{L}$ , 0.12 mmol). The crude material was purified by flash chromatography on silica gel (eluted with hexanes to EtOAc:hexanes = 30:70) to give the product (19.5 mg, 93% yield) as a yellow oil.  $R_f = 0.30$  (EtOAc:hexanes = 40:60); The NMR spectral data match the previously published data.<sup>8</sup>

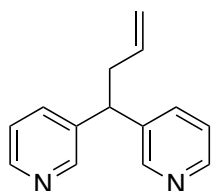

**3,3'-(But-3-ene-1,1-diyl)dipyridine (5da):** The reaction was performed following General Procedure B with di(pyridin-3-yl)methane (**4d**) (17 mg, 0.1 mmol),  $\text{LiN}(\text{SiMe}_3)_2$  (51 mg, 0.30 mmol) and allylOBoc (**2a**) (20.4  $\mu\text{L}$ , 0.12 mmol). The crude material was purified by flash chromatography on silica gel (eluted with MeOH:DCM = 2.5:97.5) to give the product (18.9 mg, 90% yield) as a yellow oil.  $R_f = 0.30$  (MeOH:DCM = 2.5:97.5); The NMR spectral data match the previously published data.<sup>8</sup>

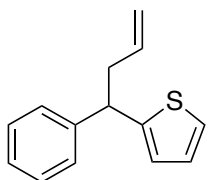

**2-(1-Phenylbut-3-en-1-yl)thiophene (5ea):** The reaction was performed following General Procedure B with 2-benzylthiophene (**4e**) (16  $\mu\text{L}$ , 0.1 mmol),  $\text{NaN}(\text{SiMe}_3)_2$  (36 mg, 0.20 mmol) and allylOBoc (**2a**) (20.4  $\mu\text{L}$ , 0.12 mmol). The crude material was purified by flash chromatography on silica gel (eluted with hexanes) to give the product (17.6 mg, 82% yield) as a colorless oil.  $R_f = 0.20$  (hexanes); The NMR spectral data match the previously published data.<sup>12</sup>

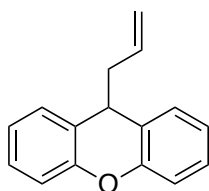

**9-Allyl-9H-xanthene (5fa):** The reaction was performed following General Procedure B with xanthene (**4f**) (18.2 mg, 0.1 mmol),  $\text{LiN}(\text{SiMe}_3)_2$  (55 mg, 0.30 mmol) and allylOBoc (**2a**) (20.4  $\mu\text{L}$ , 0.12 mmol). The crude material was purified by flash chromatography on silica gel (eluted with hexanes) to give the product (18 mg, 81% yield) as a colorless oil.  $R_f = 0.25$  (hexanes); The NMR spectral data match the previously published data.<sup>11</sup>

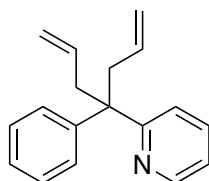

**2-(4-Phenylhepta-1,6-dien-4-yl)pyridine (6aa):** The reaction was performed following General Procedure B with 2-benzylpyridine (**4a**) (16  $\mu\text{L}$ , 0.1 mmol),  $\text{KN}(\text{SiMe}_3)_2$  (100 mg, 0.5 mmol) and allylOBoc (**2a**) (51  $\mu\text{L}$ , 0.3 mmol). The crude material was purified by flash chromatography on silica gel (eluted with hexanes to EtOAc:hexanes = 5:95) to give the product (21 mg, 84% yield) as a colorless oil.  $R_f = 0.30$  (EtOAc:hexanes = 5:95); The NMR spectral data match the previously published data.<sup>8</sup>

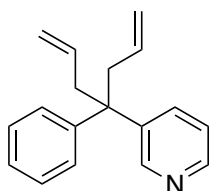

**3-(4-Phenylhepta-1,6-dien-4-yl)pyridine (6ba):** The reaction was performed following General Procedure B with 3-benzylpyridine (**4b**) (17 mg, 0.1 mmol),  $\text{KN}(\text{SiMe}_3)_2$  (100 mg, 0.5 mmol) and allylOBoc (**2a**) (51  $\mu\text{L}$ , 0.3 mmol). The crude material was purified by flash chromatography on silica gel (eluted with hexanes to EtOAc:hexanes = 20:80) to give the product (19.5 mg, 78% yield) as a colorless oil.  $R_f = 0.20$  (EtOAc:hexanes = 20:80); The NMR spectral data match the previously published data.<sup>8</sup>

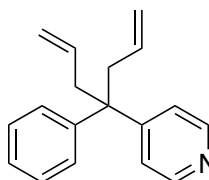

**4-(4-Phenylhepta-1,6-dien-4-yl)pyridine (6ca):** The reaction was performed following General Procedure B with 4-benzylpyridine (**4c**) (16  $\mu\text{L}$ , 0.1 mmol),  $\text{KN}(\text{SiMe}_3)_2$  (100 mg, 0.5 mmol) and allylOBoc (**2a**) (51  $\mu\text{L}$ , 0.3 mmol). The crude material was purified by flash chromatography on silica gel (eluted with hexanes to EtOAc:hexanes = 40:60) to give the product (18.7 mg, 75% yield) as a colorless oil.  $R_f = 0.25$  (EtOAc:hexanes = 40:60); The NMR spectral data match the previously published data.<sup>8</sup>

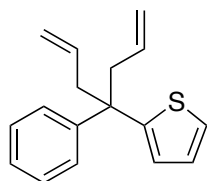

**2-(4-Phenylhepta-1,6-dien-4-yl)thiophene (6da):** The reaction was performed following General Procedure B with 2-benzylthiophene (**4e**) (16  $\mu\text{L}$ , 0.1 mmol),  $\text{KN}(\text{SiMe}_3)_2$  (100 mg, 0.5 mmol) and allylOBoc (**2a**) (51  $\mu\text{L}$ , 0.3 mmol). The crude material was purified by flash chromatography on silica gel (eluted with hexanes) to give the product (21.1 mg, 83% yield) as a colorless oil.  $R_f = 0.30$  (hexanes); The NMR spectral data match the previously published data.<sup>8</sup>

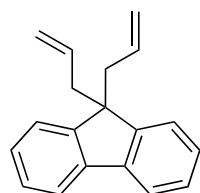

**9,9-Diallyl-9H-fluorene (6ea):** The reaction was performed following General Procedure B with 9H-fluorene (**1g**) (16.7 mg, 0.1 mmol),  $\text{KO}^t\text{Bu}$  (56 mg, 0.5 mmol) and allylOBoc (**2a**) (51  $\mu\text{L}$ , 0.3 mmol). The crude material was purified by flash chromatography on silica gel (eluted with hexanes) to give the product (22.2 mg, 90% yield) as a colorless oil.  $R_f = 0.20$  (hexanes); The NMR spectral data match the previously published data.<sup>20</sup>

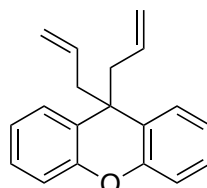

**9,9-Diallyl-9H-xanthene (6fa):** The reaction was performed following General Procedure B with xanthene (**4f**) (18.2 mg, 0.1 mmol),  $\text{NaN}(\text{SiMe}_3)_2$  (91 mg, 0.5 mmol) and allylOBoc (**2a**) (51  $\mu\text{L}$ , 0.3 mmol). The crude material was purified by flash chromatography on silica gel (eluted with hexanes) to give the product (23.3 mg, 89% yield) as a colorless oil.  $R_f = 0.25$  (hexanes); The NMR spectral data match the previously published data.<sup>8</sup>

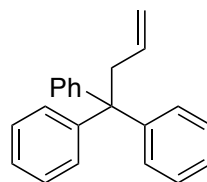

**But-3-ene-1,1,1-triyltribenzene (8aa):** The reaction was performed following General Procedure B with triphenylmethane (**7a**) (24.4 mg, 0.1 mmol),  $\text{KN}(\text{SiMe}_3)_2$  (100 mg, 0.5 mmol) and allylOBoc (**2a**) (51  $\mu\text{L}$ , 0.3 mmol). The crude material was purified by flash chromatography on silica gel (eluted with hexanes) to give the product (25.5 mg, 90% yield) as white solid.  $R_f = 0.20$  (hexanes); The NMR spectral data match the previously published data.<sup>21</sup>



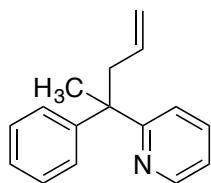

**2-(2-Phenylpent-4-en-2-yl)pyridine (8ba):** The reaction was performed following General Procedure A with 2-(1-phenylethyl)pyridine (**7b**) (18  $\mu\text{L}$ , 0.1 mmol),  $\text{KN}(\text{SiMe}_3)_2$  (100 mg, 0.5 mmol) and allylOBoc (**2a**) (51  $\mu\text{L}$ , 0.3 mmol). The crude material was purified by flash chromatography on silica gel (eluted with hexanes to EtOAc:hexanes = 5:95) to give the product (20.5 mg, 92% yield) as a colorless oil.  $R_f$  = 0.20 (EtOAc:hexanes = 5:95); The NMR spectral data match the previously published data.<sup>8</sup>

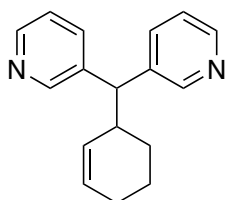

**3,3'-(Cyclohex-2-en-1-ylmethylene)dipyridine (9db) (from DPPF):** The reaction was performed following General Procedure B with di(pyridin-3-yl)methane (**4d**) (17 mg, 0.1 mmol),  $\text{NaN}(\text{SiMe}_3)_2$  (55 mg, 0.3 mmol) and cyclohexenyl OBoc (**2b**) (40  $\mu\text{L}$ , 0.2 mmol). The crude material was purified by flash chromatography on silica gel (eluted with MeOH:DCM = 2.5:97.5) to give the product (22.5 mg, 91% yield) as a yellow oil.  $R_f$  = 0.25 (MeOH:DCM = 2.5:97.5); The NMR spectral data match the previously published data.<sup>8</sup> The enantiomers were resolved by HPLC with a Daicel Chiralpak AD-H column (10% isopropanol in hexanes, 1 mL/min, 254 nm, major  $t_r$  = 23.6 min, minor  $t_r$  = 26.9 min).

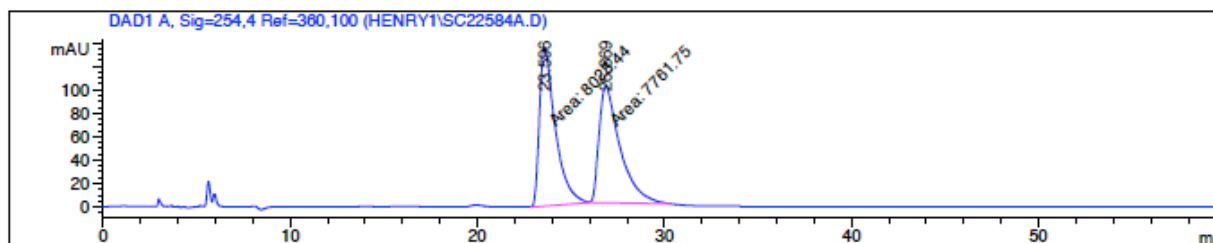

Signal 1: DAD1 A, Sig=254,4 Ref=360,100

| Peak #   | RetTime [min] | Type | Width [min] | Area [mAU*s] | Height [mAU] | Area %  |
|----------|---------------|------|-------------|--------------|--------------|---------|
| 1        | 23.596        | MM   | 0.9899      | 8028.43848   | 135.16833    | 50.8445 |
| 2        | 26.869        | MM   | 1.3019      | 7761.75195   | 99.36530     | 49.1555 |
| Totals : |               |      |             | 1.57902e4    | 234.53363    |         |

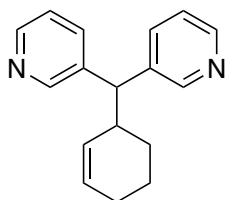

**3,3'-(Cyclohex-2-en-1-ylmethylene)dipyridine (9db)** [from L1 (SL-J204-1)]: The reaction was performed following General Procedure C with di(pyridin-3-yl)methane (**4d**) (17 mg, 0.1 mmol),  $\text{NaN}(\text{SiMe}_3)_2$  (55 mg, 0.3 mmol) and cyclohexenyl OBoc (**2b**) (40  $\mu\text{L}$ , 0.2 mmol). The crude material was purified by flash chromatography on

silica gel (eluted with  $\text{MeOH}:\text{DCM} = 2.5:97.5$ ) to give the product (22.5 mg, 91% yield, 92% e.e.) as a yellow oil.  $R_f = 0.25$  ( $\text{MeOH}:\text{DCM} = 2.5:97.5$ ); The NMR spectral data match the previously published data.<sup>8</sup>

The ee was determined by HPLC with a Daicel Chiralpak AD-H column (10% isopropanol in hexanes, 1 mL/min, 254 nm, minor  $t_r = 24.2$  min, major  $t_r = 26.8$  min).

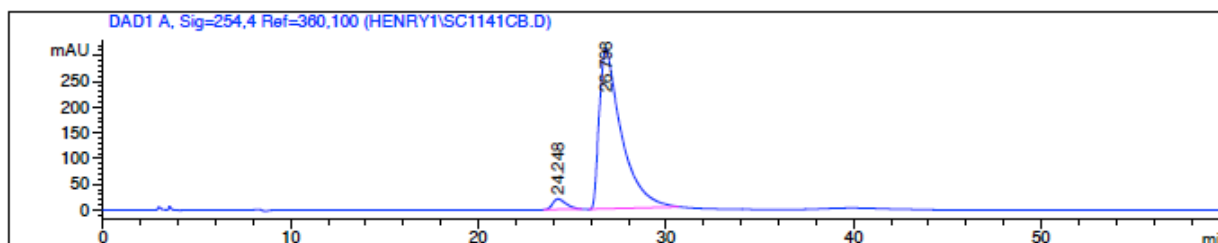

Signal 1: DAD1 A, Sig=254,4 Ref=360,100

| Peak # | RetTime [min] | Type | Width [min] | Area [mAU*s] | Height [mAU] | Area %  |
|--------|---------------|------|-------------|--------------|--------------|---------|
| 1      | 24.248        | PB   | 0.7350      | 1024.41492   | 20.71267     | 3.8563  |
| 2      | 26.798        | PB   | 1.1770      | 2.55403e4    | 312.02063    | 96.1437 |

Totals : 2.65648e4 332.73330

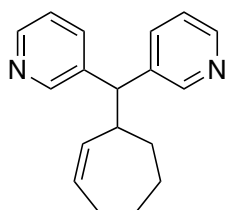

**3,3'-(Cyclohept-2-en-1-ylmethylene)dipyridine (9dd)** [from L1 (SL-J204-1)]: The reaction was performed following General Procedure B with di(pyridin-3-yl)methane (**4d**) (17 mg, 0.1 mmol),  $\text{NaN}(\text{SiMe}_3)_2$  (55 mg, 0.3 mmol) and cycloheptenyl OBoc (**2d**) (53 mg, 0.2 mmol). The crude material was purified by flash chromatography

on silica gel (eluted with  $\text{MeOH}:\text{DCM} = 2.5:97.5$ ) to give the product (22.5 mg, 85% yield) as a yellow oil.  $R_f = 0.25$  ( $\text{MeOH}:\text{DCM} = 2.5:97.5$ );  $^1\text{H}$  NMR (500 MHz;  $\text{CDCl}_3$ ):  $\delta$  8.55 (t,  $J = 3.0$ , 2H), 8.45-8.42 (m, 2H), 7.56 (ddt,  $J = 11.8, 8.0, 1.8$ , 2H), 7.21 (dt,  $J = 8.2, 4.2$ , 2H), 5.76 (dtd,  $J = 11.0, 6.5, 2.0$ , 1H), 5.40 (dd,  $J =$

11.1, 4.5, 1H), 3.89 (d, J = 11.1, 1H), 3.21-3.16 (m, 1H), 2.19-2.15 (m, 2H), 1.90 (dtd, J = 11.3, 5.7, 3.2, 1H), 1.70-1.65 (m, 1H), 1.59-1.49 (m, 2H), 1.32 (dtd, J = 9.9, 6.5, 3.3, 1H), 1.26-1.23 (m, 1H). <sup>13</sup>C NMR (126 MHz; CDCl<sub>3</sub>): δ 150.2, 149.9, 148.09, 148.01, 138.9, 138.5, 135.6, 135.3, 134.8, 132.5, 123.7, 123.6, 52.1, 42.6, 31.3, 30.5, 28.5, 26.2. IR: 2924, 2853, 1735, 1575, 1478, 1422, 1377, 1107, 1025, 799, 720. HRMS : calcd for C<sub>18</sub>H<sub>20</sub>N<sub>2</sub> [M+H]<sup>+</sup> 265.1705, found 265.1704. [α]<sub>D</sub><sup>25</sup> = 59.9. The ee was determined by HPLC with a Daicel Chiralpak AS-H column (20% isopropanol in hexanes, 0.8 mL/min, 254 nm

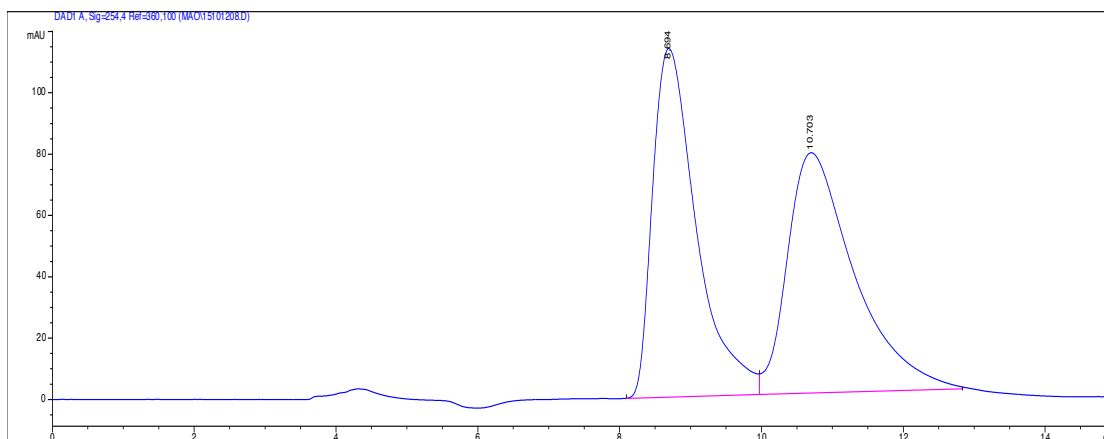

| Peak #   | RetTime [min] | Type | Width [min] | Area [mAU*s] | Height [mAU] | Area %  |
|----------|---------------|------|-------------|--------------|--------------|---------|
| 1        | 8.694         | BB   | 0.6568      | 4879.19727   | 113.67563    | 48.6841 |
| 2        | 10.703        | BB   | 0.9616      | 5142.96191   | 78.36824     | 51.3159 |
| Totals : |               |      |             | 1.00222e4    | 192.04387    |         |

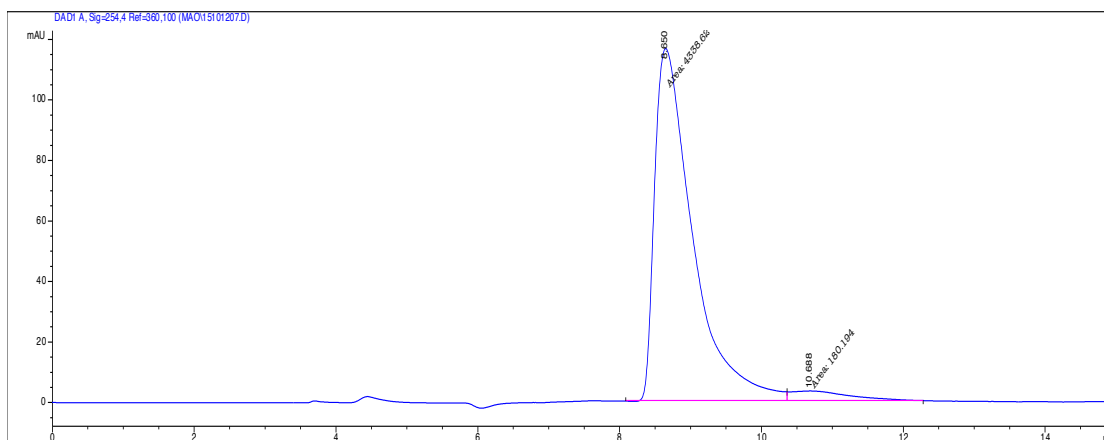

| Peak #   | RetTime [min] | Type | Width [min] | Area [mAU*s] | Height [mAU] | Area %  |
|----------|---------------|------|-------------|--------------|--------------|---------|
| 1        | 8.650         | MF   | 0.6216      | 4338.62305   | 116.32966    | 96.0124 |
| 2        | 10.688        | FM   | 0.9468      | 180.19398    | 3.17186      | 3.9876  |
| Totals : |               |      |             | 4518.81703   | 119.50152    |         |

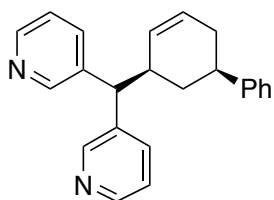

**3,3'-(((1*R*,3*R*)-1,2,3,6-tetrahydro-[1,1'-biphenyl]-3-yl)methylene)dipyridine**

**(10dc)(from DPPF):** The reaction was performed following General Procedure

B with di(pyridin-3-yl)methane (**4d**) (17 mg, 0.1 mmol),  $\text{NaN}(\text{SiMe}_3)_2$  (55 mg,

0.3 mmol) and *tert*-butyl ((1*S*,3*S*)-1,2,3,6-tetrahydro-[1,1'-biphenyl]-3-yl)

carbonate (**2c**) (54  $\mu\text{L}$ , 0.2 mmol, *cis:trans* > 30:1). The crude material was purified by flash

chromatography on silica gel (eluted with MeOH:DCM = 2.5:97.5) to give the product (29 mg, 89% yield,

*cis:trans* = 15:1) as a pale yellow oil.  $R_f$  = 0.20 (MeOH:DCM = 2.5:97.5); The NMR spectral data match

the previously published data.<sup>8</sup>

Stereochemistry was assigned by <sup>1</sup>H NMR analysis.<sup>6</sup>

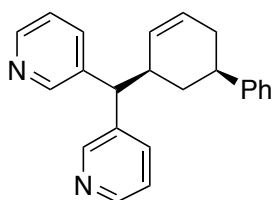

**3,3'-(((1*R*,3*R*)-1,2,3,6-tetrahydro-[1,1'-biphenyl]-3-yl)methylene)dipyridine**

**(10dc) [from L1 (SL-J204-1)]:** The reaction was performed following General

Procedure C with di(pyridin-3-yl)methane (**4d**) (17 mg, 0.1 mmol),  $\text{NaN}(\text{SiMe}_3)_2$

(55 mg, 0.3 mmol) and *tert*-butyl ((1*S*,3*S*)-1,2,3,6-tetrahydro-[1,1'-biphenyl]-3-yl)

carbonate (**2c**) (54  $\mu\text{L}$ , 0.2 mmol, *cis:trans* > 30:1). The crude material was purified by flash

chromatography on silica gel (eluted with MeOH:DCM = 2.5:97.5) to give the product (28.4 mg, 87% yield,

*cis:trans* = 15:1) as a pale yellow oil.  $R_f$  = 0.20 (MeOH:DCM = 2.5:97.5); The NMR spectral data match

the previously published data.<sup>8</sup>

### Screening Results of Achiral Ligands

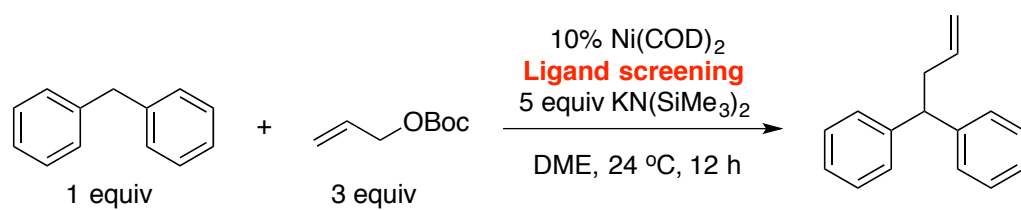

**Control: Xantphos**  
**Assay Yield/ Internal Standard**

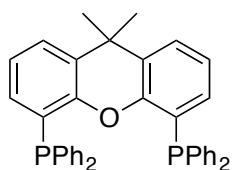

**Xantphos: 22**

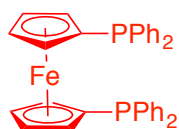

**DPPF: 46**

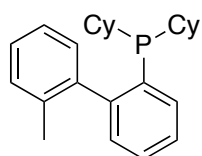

**MePhos: 11**

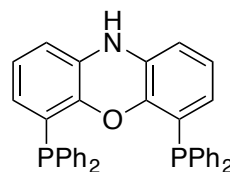

**NiXantphos: 20**

|                                                                                                |
|------------------------------------------------------------------------------------------------|
| 24 Achiral Ligands                                                                             |
| 2-(Di-tert-butylphosphino)biphenyl (JohnPhos)                                                  |
| 4-(Di-tert-butylphosphino)-N,N-dimethylaniline (Ataphos)                                       |
| 2-Dicyclohexylphosphino-2'-(N,N-dimethylamino)biphenyl (Dave Phos)                             |
| 2-Di-tert-butylphosphino-3,4,5,6-tetramethyl-2',4',6'-triisopropyl-1,1'-biphenyl (Me4tBuXPhos) |
| Dicyclohexyl-[3,6-dimethoxy-2-(2,4,6-triisopropylphenyl)phenyl]phosphane (BrettPhos)           |
| 1,1'-Bis(diphenylphosphino)ferrocene (Dppf)                                                    |
| 9,9-Dimethyl-4,5-bis(diphenylphosphino)xanthene (XantPhos)                                     |
| 2-Dicyclohexylphosphino-2'-methylbiphenyl (MePhos)                                             |
| N-(dicyclohexylphosphino)-2-2'-tolylindole (Indole ligand)                                     |
| P(O-Tol)3                                                                                      |
| P <sup>t</sup> Bu <sub>3</sub> HBF <sub>4</sub>                                                |
| 2-(Dicyclohexylphosphino)-1-phenyl-1H-pyrrole (CataCXium Pcy)                                  |
| 4,6-Bis(diphenylphosphino)phenoxazine (NIXANTPHOS)                                             |
| Di(1-adamantyl)-2-dimethylaminophenylphosphine (Me-Dalphos)                                    |
| 2-Dicyclohexylphosphino-2',6'-dimethoxybiphenyl (Sphos)                                        |
| Butyl-di-1-adamantylphosphine (CataCXium A)                                                    |
| PCy <sub>3</sub> HBF <sub>4</sub>                                                              |
| 2-Di-tert-butylphosphino-3-Methoxy-6-Methyl-2'-4'-6'-triisopropylbiphenyl (RockPhos)           |
| 1,2,3,4,5-Pentaphenyl-1'-(di-t-butylphosphino)ferrocene (Qphos)                                |
| PPh <sub>3</sub>                                                                               |
| 1-[2-[Bis(tert-butyl)phosphino]phenyl]-3,5-diphenyl-1H-pyrazole (Trippy Phos)                  |
| 2-(Dicyclohexylphosphino)biphenyl (CyJohnPhos)                                                 |
| 2-Dicyclohexylphosphino-2',4',6'-tri-i-propyl-1,1'-biphenyl (Xphos)                            |
| Di(1-adamantyl)-2-morpholinophenylphosphine (Mor-DalPhos)                                      |

## Screening Results of Chiral Ligands

| Chiral Ligands P1-52 ligands                                                                                                              | Assay Yield (%) | ee <sup>[a]</sup> (%) |
|-------------------------------------------------------------------------------------------------------------------------------------------|-----------------|-----------------------|
| (S,S)-bpm2: (2S,4S)-tBu(-)-4-(Diphenylphosphino)-2-(diphenylphosphinomethyl)pyrrolidine carboxylate                                       | 62              | 16                    |
| Catassium D: (3S,4S)-(-)-1-Benzyl-3,4-bis(diphenylphosphino)pyrrolidine                                                                   | 35              | 10                    |
| (R,R)-SL-M004-1: (SP,S'P)-1,1'-Bis[bis(4-methoxy-3,5-dimethylphenyl)phosphino]-2,2'-bis[(R)-alpha-(dimethylamino)benzyl]ferrocene         | 59              | 21                    |
| SL-W009-1: [2-[2-[(1S)-1-bis(3,5-dimethylphenyl)phosphanylethyl]cyclopentyl]phenyl]-bis(3,5-dimethylphenyl)phosphane;cyclopentane;iron    | 78              | 30                    |
| (R,R)-SL-W021-1: dimethoxy-2'-(Diphenylphosphino)phenyl]ferrocenyl]ethyl di(bis-(3,5-trifluoromethyl)phenyl)-phosphine                    | 74              | 30                    |
| (S,S)-DIOP: (4S,5S)-2,2-Dimethyl-4,5-bis(diphenylphosphinomethyl)-1,3-dioxolane                                                           | 46              | 5                     |
| (S,S)-SL-M001-1: (aR,aR)-2,2'-Bis(a-N,N-dimethylaminophenylmethyl)-(S,S)-1,1'-bis(diphenylphosphino)-ferrocene                            | 64              | 35                    |
| (S,S)-SL-M002-1: (aR,aR)-2,2'-Bis(a-N,N-dimethylaminophenylmethyl)-(S,S)-1,1'-bis(dicyclohexylphosphino)-ferrocene                        | 64              | 14                    |
| (S,S)-SL-M003-1: (aR,aR)-2,2'-Bis(a-N,N-dimethylaminophenylmethyl)-(S,S)-1,1'-bis[di(bis(3,5-trifluoromethyl)-phenyl)phosphino]-ferrocene | 27              | 11                    |
| (S)-BINAPINE: (3S,3'S,4S,4'S,11bS,11'bS)-(+)-4,4'-Di-t-butyl-4,4',5,5'-tetrahydro-3,3'-bi-3H-dinaphtho[2,1-c:1',2'-e]phosphine            | 27              | 11                    |
| (S,S)-SL-T001-1: (S)-1-Diphenylphosphino-2-[(S)-a-(N,N-dimethyl-amino)-o-(diphenylphosphinophenyl)methyl]-ferrocene                       | 71              | 20                    |
| (R,S)-SL-T002-1: (R)-1-Dicyclohexylphosphino-2-[(R)-a-(N,N-dimethylamino)-o-(dicyclohexylphosphinophenyl)-methyl]-ferrocene               | 65              | 12                    |
| (S)-CTH-JAFAPHOS: (R)-CTH-JAFAPHOS;(R)-(+)-1,1'-BIS(DIPHENYLPHOSPHINO)-2,2'-BIS(N,N-DIISOPROPYLAMIDO)FERROCENE                            | 51              | 20                    |
| (R,R)-Me-DuPhos: 1,2-bis((2R,5R)-2,5-dimethylphospholano)benzene                                                                          | 76              | 60                    |
| (R,R)-i-Pr-DUPHOS: (+)-1,2-Bis((2R,5R)-2,5-di-i-propylphospholano)benzene                                                                 | 48              | 13                    |
| (R,R) Et-DuPhos: (-)-1,2-BIS((2R,5R)-2,5-DIETHYLPHOSPHOLANO)BENZENE                                                                       | 67              | 15                    |
| (R)-Prophos: (R)-(+)-BIS-(1,2-DIPHENYLPHOSPHINO)PROPANE                                                                                   | 15              | -                     |
| SL-J011-1: (R)-1-[(S)-2-Di-(4-trifluoromethylphenylphosphino)ferrocenyl]-ethyl-di-tert-butylphosphine                                     | 56              | 20                    |
| SL-J412-1: (R)-1-[(S)-2-bis(3,5-dimethylphenyl)phosphino]ferrocenyl]ethyl bis[bis-(3,5-trifluoro-methyl)phenyl]-phosphine                 | 49              | 12                    |
| SL-W022-1: (R)-1-[(RP)-2-[2-(Diphenylphosphino)phenyl]ferrocenyl]ethyldi(2-norbornyl)phosphine                                            | 68              | -                     |
| SL-F011-2: (Twinphos, analog of Me-BoPhoz)                                                                                                | 76              | 6                     |
| SL-F013-2: (Twinphos, analog of P(cyco)-BoPhoz)                                                                                           | 80              | 44                    |
| (S,S)-Ph-BPE: (+)-1,2-Bis((2S,5S)-2,5-diphenylphospholano)ethane                                                                          | 59              | 50                    |
| (+)-catASium I: [(1R,2R,3S)-(+)-1,2-Dimethyl-2,3-bis(diphenylphosphinomethyl)cyclopentyl]methanol                                         | 71              | 37                    |
| (S,S)-CHIRAPHOS: (2S,3S)-(-)-Bis(diphenylphosphino)butane                                                                                 | 31              | 9                     |
| (R,R)-SL-W002-1: (R)-1-[(R)-2-(2'-Diphenylphosphinophenyl)-ferrocenyl]-ethyl-diphenylphosphine                                            | 78              | 3                     |
| (S,S)-DIPAMP: (S,S)-(+)-1,2-Bis[(2-methoxyphenyl)(phenyl)phosphino]ethane                                                                 | 59              | 20                    |
| (1S,1'S,2R,2'R)-DuanPhos: (1S,1'S,2R,2'R)-2,2'-Di-tert-butyl-2,3,2',3'-tetrahydro-1H,1'H-(1,1')biisosphindolyl                            | 62              | 17                    |
| (R)-BINAPHANE: (R,R)-(-)-1,2-Bis((R)-4,5-dihydro-3H-binaphtho[1,2-c:2',1'-e]phosphino)benzene                                             | 71              | 5                     |
| (S,S,S,S)-Me-Ketalphos                                                                                                                    | 71              | 3                     |

|                                                                                                                                                                                                                                                                                                                           |    |    |
|---------------------------------------------------------------------------------------------------------------------------------------------------------------------------------------------------------------------------------------------------------------------------------------------------------------------------|----|----|
| (S,S,R,R)-TANGPHOS: (1S,1'S,2R,2'R)-(+)-1,1'-Di- <i>t</i> -butyl-[2,2']-diphospholane                                                                                                                                                                                                                                     | 29 | -  |
| SL-W006-1: (R)-1-[(R)-2-(2'-Diphenylphosphinophenyl)-ferrocenyl]-ethyl-di-3,5-xylylphosphine                                                                                                                                                                                                                              | 74 | 20 |
| (-)-MOD DIOP: ((4S,5S)-2,2-diMethyl-1,3-dioxolane-4,5-diyl)bis(Methylene)bis(bis(3,5-diMethylphenyl)phosphine)                                                                                                                                                                                                            | 53 | 13 |
| SL-W003-1: (R)-1-[(R)-2-(2'-Diphenylphosphinophenyl)-ferrocenyl]-ethyl-dicyclohexylphosphine                                                                                                                                                                                                                              | 72 | 5  |
| CTH-(R)-SpiroP: 1R,5R,6R-(+)-1,6-Bis(diphenylphosphinoxy)spiro[4.4]nonane                                                                                                                                                                                                                                                 | 74 | 3  |
| SL-W001-1: (R)-1-[(R)-2-(2'-Diphenylphosphinophenyl)-ferrocenyl]-ethyl-di-bis(3,5-trifluoromethyl-phenyl)phosphine                                                                                                                                                                                                        | 73 | 15 |
| CARBOPHOS: METHYL-ALPHA-D-GLUCOPYRANOSIDE-2,6-DIBENZOATE-3,4-DI(BIS(3,5-DIMETHYLPHENYL)PHOSPHINITE)                                                                                                                                                                                                                       | 76 | 7  |
| (1S,2S)-(-)-Bis(methylphenylphosphino)benzene                                                                                                                                                                                                                                                                             | 59 | -  |
| SL-W008-1: (R)-1-[(R)-2-(2'-Dicyclohexylphosphinophenyl)-ferrocenyl]-ethyl-di-bis(3,5-trifluoromethyl)-phenyl)phosphine                                                                                                                                                                                                   | 72 | 45 |
| (S)-Me-f-Ketalphos: 1,1'-Bis[(3a <i>S</i> ,4 <i>S</i> ,6 <i>S</i> ,6a <i>S</i> )-tetrahydro-2,2,4,6-tetramethyl-5 <i>H</i> -phospholo[3,4- <i>d</i> ]-1,3-dioxol-5-yl]ferrocene, 1,1-Bis[(2 <i>S</i> ,3 <i>S</i> ,4 <i>S</i> ,5 <i>S</i> )-2,5-dimethyl-3,4- <i>O</i> -isopropylidene-3,4-dihydroxyphospholanyl]ferrocene | 76 | 30 |
| SL-W005-1: (R)-1-[( <i>R<sub>p</sub></i> )-2-[2-Bis(4-methoxy-3,5-dimethylphenyl)phosphino]phenyl]ferrocenyl]ethylbis[3,5-bis(trifluoromethyl)phenyl]phosphine                                                                                                                                                            | 72 | 28 |
| (R,R)-NORPHOS: (2R,3R)-(-)-2,3-BIS(DIPHENYLPHOSPHINO)BICYCLO[2.2.1]HEPT-5-ENE                                                                                                                                                                                                                                             | 40 | 9  |
| catASium D (R):(3R,4R)-(+)-1-BENZYL-3,4-BIS(DIPHENYLPHOSPHINO)PYRROLIDINE                                                                                                                                                                                                                                                 | 54 | 4  |
| M012-1: (S,S)-(-)-2,2'-BIS[(R)-(N,N-DIMETHYLAMINO)(PHENYL)METHYL]-1,1'-BIS(DI(2-METHYLPHENYL)PHOSPHINO)FERROCENE                                                                                                                                                                                                          | 46 | 22 |
| CTH-(R)-3,5-xylyl-PHANEPHOS: (R)-(-)-4,12-Bis(di(3,5-xylyl)phosphino)-[2.2]-paracyclophane                                                                                                                                                                                                                                | 54 | 27 |
| (S,S)-BDPP: (2S,4S)-(-)-2,4-BIS(DIPHENYLPHOSPHINO)PENTANE                                                                                                                                                                                                                                                                 | 24 | 9  |
| (R,R)-QuinoxP*: (R,R)--2,3-Bis(tert-butylmethylphosphino)quinoxaline                                                                                                                                                                                                                                                      | 37 | -  |
| SL-J005-1: (R)-1-[(S)-2-(Diphenylphosphino)ferrocenyl]-ethyl-di-3,5-xylylphosphine                                                                                                                                                                                                                                        | 48 | 25 |
| SL-J216-1: (R)-1-[(S)-2-(Di-1-naphtylphosphino)ferrocenyl]-ethyl-di-tert.-butylphosphine                                                                                                                                                                                                                                  | 40 | 20 |
| SL-J404-1: (R)-1-[(S)-2-(Di-1-naphtylphosphino)ferrocenyl]-ethyl-di-3,5-xylylphosphine                                                                                                                                                                                                                                    | 61 | 31 |
| SL-J502-1: (R)-1-[(S)-2-(Di-tert.-butylphosphino)ferrocenyl]-ethyl-diphenylphosphine                                                                                                                                                                                                                                      | 64 | 7  |
| SL-J505-1: (R)-1-[(S)-2-(Di-tert.-butylphosphino)ferrocenyl]-ethyl-di-2-methylphenylphosphine                                                                                                                                                                                                                             | 26 | 23 |

| Chiral Ligands P2-70 ligands                                                                                                   | Assay Yield (%) | ee <sup>[a]</sup> (%) |
|--------------------------------------------------------------------------------------------------------------------------------|-----------------|-----------------------|
| (R,R)-Me-BPE: (+)-1,2-Bis[(2R,5R)-2,5-dimethylphospholano]ethane                                                               | 22              | 13                    |
| (R,R)-Et-BPE: (+)-1,2-Bis((2R,5R)-2,5-diethylphospholano)ethane                                                                | 41              | -                     |
| (R,R)-iPr-BPE: 1,2-BIS[(2R,5R)-2,5-DIISOPROPYLPHOSPHOLANO]ETHANE                                                               | 46              | 9                     |
| (R,R)-Me-Ferrolane: 1,1'-BIS[(2R,5R)-2,5-DIMETHYLPHOSPHOLANO]FERROCENE                                                         | 62              | 11                    |
| (R,R)-Et-Ferrolane: 1,1'-BIS[(2R,5R)-2,5-DIETHYLPHOSPHOLANO]FERROCENE                                                          | 64              | 20                    |
| (R,R)-iPr-Ferrolane: 1,1'-Bis[(2R,5R)-2,5-diisopropylphospholano]ferrocene                                                     | 63              | 4                     |
| SL-F131-1 (Trifer): 1,1'-BIS[(R)-[(RP)-2-[(S)-1-(DIMETHYLAMINO)ETHYL]FERROCENYL]PHENYLPHOSPHINO]FERROCENE                      | 52              | 20                    |
| SL-F356-1 (Chenphos): 1-DICYCLOHEXYLPHOSPHINO-1'-[(R)-[(RP)-2-[(S)-1-(DIMETHYLAMINO)ETHYL]FERROCENYL]PHENYLPHOSPHINO]FERROCENE | 71              | 9                     |



|                                                                                                                                                                                                              |    |    |
|--------------------------------------------------------------------------------------------------------------------------------------------------------------------------------------------------------------|----|----|
| SL-J681-1: (S, Rp, SSPO)-1-tert.-butylphosphinoyl)-2-[1-(diphenylphosphino)ethyl]ferrocene                                                                                                                   | 53 | 15 |
| SL-J688-1: (RP)-1-[(S)-1-(DI-TERT-BUTYLPHOSPHINO)ETHYL]-2-[(S)-PHENYLPHOSPHINOYL]FERROCENE                                                                                                                   | 58 | 45 |
| (R)-PhanePhos: (R)-(-)-4,12-BIS(DIPHENYLPHOSPHINO)-[2.2]-PARACYCLOPHANE                                                                                                                                      | 52 | 7  |
| (R)-An-PhanePhos: (R)-4,12-Bis[di(4-methoxyphenyl)phosphino]-[2.2]-paracyclophane                                                                                                                            | 62 | 3  |
| (1S,1'S)-ethane-1,2-diylbis(tert-butyl(methyl)phosphonium) tetrafluoroborate                                                                                                                                 | 68 | 13 |
| (R,R)-miniPHOS 2HBF4: (1R,1'R)-methylenebis(tert-butyl(methyl)phosphonium) tetrafluoroborate                                                                                                                 | 25 | 25 |
| (R)-di-tert-butyl((tert-butyl(methyl)phosphonio)methyl)phosphonium tetrafluoroborate                                                                                                                         | 27 | 51 |
| (S)-MaxPhos HBF4: (S)-(tert-butylmethylphosphonium)(di-tert-butylphosphino)amine tetrafluoroborate                                                                                                           | 21 | 30 |
| (R,R)-(+)-1,2-Bis(t-butylmethylphosphino)benzene                                                                                                                                                             | 3  | -  |
| (R,R)-Nap-DIPAMP: 1,2-bis((R)-naphthalen-1-yl(phenyl)phosphino)ethane                                                                                                                                        | 59 | -  |
| (R,R)-Tol-DIPAMP: 1,2-bis((R)-phenyl(o-tolyl)phosphino)ethane                                                                                                                                                | 19 | 10 |
| (S,S)-iPr-DIPAMP: 1,2-bis((S)-(2-isopropylphenyl)(phenyl)phosphino)ethane                                                                                                                                    | 44 | 47 |
| (S,S)-Ph2-DIPAMP: 1,2-bis((S)-[1,1'-biphenyl]-2-yl(phenyl)phosphino)ethane                                                                                                                                   | 19 | 31 |
| catASium T1 (R): (1R,AR)-3-DIPHENYLPHOSPHINO-2-(4-DIPHENYLPHOSPHINO-2,5-DIMETHYL-3-THIENYL)-1,7,7-TRIMETHYL-BICYCLO[2.2.1]HEPT-2-ENE                                                                         | 17 | 44 |
| catASium T3 (R): (1R,AR)-3-DIPHENYLPHOSPHINO-2-(4-BIS(3,5-DIMETHYLPHENYL)PHOSPHINO-2,5-DIMETHYL-3-THIENYL)-1,7,7-TRIMETHYLBICYCLO[2.2.1]HEPT-2-ENE                                                           | 21 | 27 |
| (R)-Tol-Binap: (R)-(+)-2,2'-BIS(DI-P-TOLYLPHOSPHINO)-1,1'-BINAPHTHYL                                                                                                                                         | 66 | 13 |
| (R)-Hexaphemp                                                                                                                                                                                                | 43 | 7  |
| (S)-Me-Soniphos: (S)-(-)-6,6'-Bis(diphenylphosphino)-1,1'-biphenyl-2,2'-diylbis(acetate)                                                                                                                     | 64 | 9  |
| (R)-Cl,MeO-Biphep: (R)-(+)-5,5'-DICHLORO-6,6'-DIMETHOXY-2,2'-BIS(DIPHENYLPHOSPHINO)-1,1'-BIPHENYL                                                                                                            | 64 | 33 |
| SL-J203-2                                                                                                                                                                                                    | 63 | 71 |
| SL-A109-2: (S)-2,2'-Bis(di(3,5-di-tert-butyl-4-methoxyphenyl)phosphino)-6,6'-dimethoxy-1,1'-biphenyl                                                                                                         | 21 | 37 |
| (R)-P-Phos: (R)-(+)-2,2',6,6'-Tetramethoxy-4,4'-bis(diphenylphosphino)-3,3'-bipyridine                                                                                                                       | 71 | 37 |
| (R)-DTBM-SEGPPOS: (R)-(-)-5,5'-Bis[di(3,5-di-tert-butyl-4-methoxyphenyl)phosphino]-4,4'-bi-1,3-benzodioxole, [(4R)-(4,4'-bi-1,3-benzodioxole)-5,5'-diyl]bis[bis(3,5-di-tert-butyl-4-methoxyphenyl)phosphine] | 22 | 27 |
| (S)-Binap: (S)-(+)-2,2'-BIS(DIPHENYLPHOSPHINO)-1,1'-BINAPHTHYL                                                                                                                                               | 65 | 3  |
| (R)-xyl-binap: (R)-(+)-2,2'-BIS[DI(3,5-XYLYL)PHOSPHINO]-1,1'-BINAPHTHYL                                                                                                                                      | 68 | 25 |
| (R)-DM-SEGPPOS: (R)-(+)-5,5'-Bis[di(3,5-xylyl)phosphino]-4,4'-bi-1,3-benzodioxole, [(4R)-(4,4'-bi-1,3-benzodioxole)-5,5'-diyl]bis[bis(3,5-dimethylphenyl)phosphine]                                          | 62 | 20 |
| (R)-Difluorophos: (R)-(-)-5,5'-Bis(diphenylphosphino)-2,2,2',2'-tetrafluoro-4,4'-bi-1,3-benzodioxole                                                                                                         | 72 | 20 |
| SL-A120-2: (S)-2,2'-Bis[bis(3,5-dimethyl)phosphino]-6,6'-dimethoxy-1,1'-biphenyl                                                                                                                             | 58 | 23 |
| (R)-H8-BINAP: (R)-(+)-2,2'-Bis(diphenylphosphino)-5,5',6,6',7,7',8,8'-octahydro-1,1'-binaphthyl, [(1R)-5,5',6,6',7,7',8,8'-octahydro-[1,1'-binaphthalene]-2,2'-diyl]bis[diphenylphosphine]                   | 34 | 47 |
| (S)-Xylyl-P-Phos: (S)-(-)-2,2',6,6'-Tetramethoxy-4,4'-bis(di(3,5-xylyl)phosphino)-3,3'-bipyridine                                                                                                            | 65 | 27 |
| (S)-cHex-Soniphos: (S)-(-)-6,6'-Bis(diphenylphosphino)-1,1'-biphenyl-2,2'-diylbis(cyclohexylcarboxylate),                                                                                                    | 57 | 11 |
| SL-A102-1: (R)-2,2'-Bis(di-p-tolylphosphino)-6,6'-dimethoxy-1,1'-biphenyl                                                                                                                                    | 58 | 23 |
| SL-A107-1: (R)-2,2'-Bis[bis(3,5-diisopropyl-4-dimethylaminophenyl)phosphino]-6,6'-dimethoxy-1,1'-biphenyl                                                                                                    | 24 | 13 |
| SL-A104-1: (R)-2,2'-Bis[bis(3,4,5-trimethoxyphenyl)phosphino]-6,6'-dimethoxy-1,1'-biphenyl                                                                                                                   | 47 | 53 |
| SL-A121-1: (R)-2,2'-Bis[bis(3,5-di-tert-butyl)phosphino]-6,6'-dimethoxy-1,1'-biphenyl                                                                                                                        | 24 | 14 |

|                                                                                                                                                                                                          |    |    |
|----------------------------------------------------------------------------------------------------------------------------------------------------------------------------------------------------------|----|----|
| SL-A108-1: (R)-(+)-2,2'-Bis(di-2-furylphosphino)-6,6'-dimethoxy-1,1'-biphenyl                                                                                                                            | 64 | 7  |
| SL-A116-1: (R)-2,2'-Bis(diisopropylphosphino)-6,6'-dimethoxy-1,1'-biphenyl                                                                                                                               | 28 | 5  |
| SL-A118-1: (R)-2,2'-Bis(dicyclobutylphosphino)-6,6'-dimethoxy-1,1'-biphenyl                                                                                                                              | 72 | 35 |
| (R,R)-DACH-Phenyl Trost Ligand: (1 <i>R</i> ,2 <i>R</i> )-(+)-1,2-Diaminocyclohexane- <i>N,N'</i> -bis(2-diphenylphosphinobenzoyl)                                                                       | 55 | 20 |
| (R,R)-DACH-Naphthyl Trost Ligand: (1 <i>R</i> ,2 <i>R</i> )-(+)-1,2-Diaminocyclohexane- <i>N,N'</i> -bis(2-diphenylphosphino-1-naphthoyl)                                                                | 44 | 11 |
| SL-N003-2 (( <i>S</i> )-4-Isopropyl-2-[( <i>S</i> )-2-(diphenylphosphino)ferrocen-1-yl]oxazoline)                                                                                                        | 56 | 14 |
| SL-N008-2 (( <i>S</i> )-4-Isopropyl-2-[( <i>S</i> )-2-(bis(3,5-dimethyl-4-methoxyphenyl)phosphino)ferrocen-1-yl]oxazoline)                                                                               | 56 | 12 |
| SL-N011-2 (( <i>S</i> )-4-Isopropyl-2-[( <i>S</i> )-2-(bis(1-naphthyl)phosphino)ferrocen-1-yl]oxazoline)                                                                                                 | 51 | 25 |
| SL-N012-2 (( <i>S</i> )-4-Isopropyl-2-[( <i>S</i> )-2-(bis(2-methoxyphenyl)phosphino)ferrocen-1-yl]oxazoline)                                                                                            | 17 | 53 |
| SL-N004-2: ( <i>S</i> )-4-tert.-Butyl-2-[( <i>S</i> )-2-(bis(1-phenyl)-phosphino)ferrocen-1-yl]oxazoline                                                                                                 | 58 | 29 |
| ( <i>S</i> )-Xyl-SDP: ( <i>S</i> )-(-)-7,7'-Bis[di(3,5-dimethylphenyl)phosphino]-1,1'-spirobiindane, ( <i>S</i> )-(-)-7,7'-Bis[di(3,5-dimethylphenyl)phosphino]-2,2',3,3'-tetrahydro-1,1'-spirobiindane  | 26 | 32 |
| ( <i>S</i> )-Tol-SDP: ( <i>S</i> )-(-)-7,7'-Bis[di(4-methylphenyl)phosphino]-2,2',3,3'-tetrahydro-1,1'-spirobiindane, ( <i>S</i> )-(-)-7,7'-Bis[di( <i>p</i> -methylphenyl)phosphino]-1,1'-spirobiindane | 24 | 23 |
| SL-J001-1: (R)-(-)-1-[( <i>S</i> )-2-(DIPHENYLPHOSPHINO)FERROCENYL]ETHYLDICYCLOHEXYLPHOSPHINE                                                                                                            | 63 | 25 |
| SL-J002-1: (R)-1-[( <i>S</i> )-2-(Diphenylphosphino)ferrocenyl]-ethyl-di-tert.-butylphosphine                                                                                                            | 65 | 40 |
| SL-J004-1: (R)-(-)-1-[( <i>S</i> )-2-(DICYCLOHEXYLPHOSPHINO)FERROCENYL]ETHYLDIPHENYLPHOSPHINE                                                                                                            | 43 | 32 |
| SL-J006-1: (R)-1-[( <i>S</i> )-2-Di-(3,5-bis(trifluoromethyl)phenyl-phosphino)ferrocenyl]-ethyl-dicyclohexylphosphine                                                                                    | 76 | 44 |
| SL-J008-1: (R)-1-[( <i>S</i> )-2-Di-(3,5-bis(trifluoromethyl)phenyl-phosphino)-ferrocenyl]-ethyl-di-3,5-xylylphosphine                                                                                   | 51 | 30 |
| SL-J204-1                                                                                                                                                                                                | 75 | 70 |
| SL-J013-1: (R)-1-[( <i>S</i> )-2-Di-(4-methoxy-3,5-dimethylphenyl-phosphino)ferrocenyl]-ethyl-di-tert.-butyl-phosphine                                                                                   | 65 | 40 |
| SL-J212-1: (R)-1-[( <i>S</i> )-2-(Di-2-furylphosphino)ferrocenyl]-ethyl-di-tert.-butylphosphine                                                                                                          | 71 | 40 |
| SL-J425-1: (R)-1-[( <i>S</i> )-2-Di-(4-methoxy-3,5-dimethylphenyl-phosphino)ferrocenyl]-ethyl-di-2-methylphenyl-phosphine                                                                                | 52 | 27 |
| SL-J452-1: (R)-1-[( <i>S</i> )-2-(Di-2-furylphosphino)ferrocenyl]-ethyl-di-2-methylphenylphosphine                                                                                                       | 75 | 29 |
| SL-J003-1: (R)-(-)-1-[( <i>S</i> )-2-(DICYCLOHEXYLPHOSPHINO)FERROCENYL]ETHYLDICYCLOHEXYLPHOSPHINE                                                                                                        | 67 | 20 |
| SL-J007-1: (R)-1-[( <i>S</i> )-2-Di-(4-methoxy-3,5-dimethylphenyl-phosphino)ferrocenyl]-ethyl-dicyclohexylphosphine                                                                                      | 64 | -  |
| SL-J009-1: (R)-1-[( <i>S</i> )-2-(Dicyclohexylphosphino)ferrocenyl]-ethyl-di-tert.-butylphosphine                                                                                                        | 29 | 44 |
| SL-J015-2: ( <i>S</i> )-1-[( <i>R</i> )-2-(Di-2-furylphosphino)ferrocenyl]-ethyl-di-3,5-xylylphosphine                                                                                                   | 66 | 3  |
| SL-J418-1: (R)-1-[( <i>S</i> )-2-Di-(4-methoxy-3,5-dimethylphenyl-phosphino)ferrocenyl]-ethyl-di-3,5-xylylphosphine                                                                                      | 53 | 28 |

| Chiral Ligands P3-56 ligands                                                                                                | Assay Yield (%) | E <sub>e</sub> <sup>[a]</sup> (%) |
|-----------------------------------------------------------------------------------------------------------------------------|-----------------|-----------------------------------|
| (R)-MonoPhos: (R)-(-)-[4-N,N-DIMETHYLAMINO]DINAPHTHO[2,1-D:1',2'-F][1,3,2]DIOXAPHOSPHINE                                    | 45              | 10                                |
| (S)-N-Me-N-Bn-MonoPhos: ( <i>S</i> )-(+)-(3,5-DIOXA-4-PHOSPHA-CYCLOHEPTA[2,1-A:3,4-A']DINAPHTHALEN-4-YL)BENZYL(METHYL)AMINE | 56              | 7                                 |
| (S)-PipPhos: ( <i>S</i> )-(+)-(3,5-Dioxa-4-phosphacyclohepta[2,1-a;3,4-a']dinaphtalen-4-yl)piperidine                       | 53              | 3                                 |
| (S)-2,6-Me-MonoPhos: ( <i>S</i> )-(+)-(2,6-Dimethyl-3,5-dioxa-4-phospha-cyclohepta[2,1-a;3,4-                               | 52              | 23                                |

|                                                                                                                                                                   |    |    |
|-------------------------------------------------------------------------------------------------------------------------------------------------------------------|----|----|
| a]dinaphthalen-4-yl)dimethylamine                                                                                                                                 |    |    |
| (S,R)-(a-MeBn)-MonoPhos: (S)-(+)-(3,5-Dioxa-4-phospha-cyclohepta[2,1-a;3,4-a]dinaphthalen-4-yl)[(1R)-1-phenylethyl]amine                                          | 21 | 13 |
| (S,R,R)-(a-MeBn)2-MonoPhos: (S)-(+)-(3,5-DIOXA-4-PHOSPHA-CYCLOHEPTA[2,1-A;3,4-A]DINAPHTHALEN-4-YL)BIS[(1R)-1-PHENYLETHYL]AMINE, DICHLOROMETHANE ADDUCT            | 37 | 9  |
| (S,S,S)-(a-MeBn)2-MonoPhos: (S)-(+)-(3,5-Dioxa-4-phospha-cyclohepta[2,1-a;3,4-a]dinaphthalen-4-yl)bis[(1S)-1-phenylethyl]amine                                    | 40 | 8  |
| (S)-H8-MonoPhos: (S)-(+)-(8,9,10,11,12,13,14,15-OCTAHYDRO-3,5-DIOXA-4-PHOSPHA-CYCLOHEPTA[2,1-A;3,4-A]DINAPHTHALEN-4-YL)DIMETHYLAMINE                              | 41 | 16 |
| (S)-H8-PipPhos: 1-[(11bS)-8,9,10,11,12,13,14,15-octahydrodinaphtho[2,1-d:1',2'-f][1,3,2]dioxaphosphocin-4-yl]piperidine                                           | 20 | 26 |
| (R)-BINOL-P-OiPr: (R)-BINAPHTHYLISOPROPYLPHOSPHITE                                                                                                                | 13 | 60 |
| (R)-BINOL-P-OiBu: (R)-BINAPHTHYLISOBUTYLPHOSPHITE                                                                                                                 | 14 | -  |
| (R,R)-TADDOL-P-NMe2: (3aR,8aR)-(-)-(2,2-Dimethyl-4,4,8,8-tetraphenyl-tetrahydro-[1,3]dioxolo[4,5-e][1,3,2]dioxaphosphocin-6-yl)dimethylamine                      | 21 | -  |
| (R)-SIPHOS (11aR)-(+)-10,11,12,13-tetrahydrodiindeno[7,1-de:1',7'-fg][1,3,2]dioxaphosphocin-5-dimethylamine                                                       | 53 | 3  |
| (R)-SIPHOS-PE: (11aR)-(+)-10,11,12,13-tetrahydrodiindeno[7,1-de:1',7'-fg][1,3,2]dioxaphosphocin-5-bis[(R)-1-phenylethyl]amine                                     | 33 | 27 |
| (R)-ShiP: (11aR)-(+)-10,11,12,13-tetrahydrodiindeno[7,1-de:1',7'-fg][1,3,2]dioxaphosphocin-5-phenoxy                                                              | 2  | 57 |
| (S,S)-Mikami Ligand: 2,10-dimethyl-N,N-bis[(1S)-1-phenylethyl]-12H-Dibenzo[d,g][1,3,2]dioxaphosphocin-6-amine                                                     | 32 | 27 |
| (S,S)-tBu-Mikami Ligand: 4,8-di-tert-butyl-2,10-dimethyl-N,N-bis[(1S)-1-phenylethyl]-12H-Dibenzo[d,g][1,3,2]dioxaphosphocin-6-amine                               | 19 | 29 |
| (R)-Quinap: (R)-1-(2-DIPHENYLPHOSPHINO-1-NAPHTHYL)ISOQUINOLINE                                                                                                    | 37 | 3  |
| (R)-N-PINAP: (R)-(+)-4-[2-(DIPHENYLPHOSPHINO)-1-NAPHTHALENYL]-N-[(R)-1-PHENYLETHYL]-1-PHTHALAZINAMINE                                                             | 31 | 11 |
| (R)-MOP: (R)-(+)-2-(Diphenylphosphino)-2'-methoxy-1,1'-binaphthyl                                                                                                 | 21 | 9  |
| (R,R)-Me-DuPhos Monoxide: (2R,5R)-1-[2-[(2R,5R)-2,5-DIMETHYLPHOSPHOLAN-1-YL]PHENYL]-2,5-DIMETHYLPHOSPHOLANE 1-OXIDE                                               | 26 | 3  |
| (S,S)-Me-RajPhos: (2S,5S)-(+)-1-(2-(1,3-DIOXOLAN-2-YL)PHENYL)-2,5-DIMETHYLPHOSPHOLANE                                                                             | 39 | 11 |
| (S,S)-Et-RajPhos: (2S,5S)-(-)-1-(2-(1,3-DIOXOLAN-2-YL)PHENYL)-2,5-DIETHYLPHOSPHOLANE                                                                              | 30 | 7  |
| (S,S,S)-DiazaPhos-PPE: 2,2'-[(1S,3S)-2,3,5,10-tetrahydro-5,10-dioxo-2-phenyl-1H-[1,2,4]diazaphospholo[1,2b]phthalazine-1,3-diy]bis[N-(1S)-1-phenylethyl]benzamide | 26 | 20 |
| (S)-BINAP: (S)-(+)-2,2'-BIS(DIPHENYLPHOSPHINO)-1,1'-BINAPHTHYL                                                                                                    | 66 | 3  |
| (R)-xyl-BINAP: (R)-(+)-2,2'-BIS[DI(3,5-XYLYL)PHOSPHINO]-1,1'-BINAPHTHYL                                                                                           | 69 | 23 |
| (R)-SegPhos: (R)-(+)-5,5'-BIS(DIPHENYLPHOSPHINO)-4,4'-BI-1,3-BENZODIOXOLE                                                                                         | 65 | 31 |
| SL-J002-1: (R)-1-[(S)-2-(Diphenylphosphino)ferrocenyl]-ethyl-di-tert.-butylphosphine                                                                              | 52 | 47 |
| SL-J212-1: (R)-1-[(S)-2-(Di-2-furylphosphino)ferrocenyl]-ethyl-di-tert.-butylphosphine                                                                            | 76 | 45 |
| SL-J005-1: (R)-1-[(S)-2-(Diphenylphosphino)ferrocenyl]-ethyl-di-3,5-xylylphosphine                                                                                | 39 | 13 |
| SL-J009-1: (R)-1-[(S)-2-(Dicyclohexylphosphino)ferrocenyl]-ethyl-di-tert.-butylphosphine                                                                          | 31 | 31 |
| SL-J006-2: (S)-1-[(R)-2-Di-(3,5-bis(trifluoromethyl)phenyl)-phosphino]ferrocenyl]-ethyl-dicyclohexylphosphine                                                     | 77 | 53 |
| (S,S)-Me-DuPhos: (+)-1,2-BIS[(2S,5S)-2,5-DIMETHYLPHOSPHOLANO]BENZENE                                                                                              | 75 | 55 |
| (1S,1'S,2R,2'R)-DuanPhos: (1S,1'S,2R,2'R)-2,2'-Di-tert-butyl-2,3,2',3'-tetrahydro-1H,1'H-(1,1')biisosphosphindolyl                                                | 57 | 11 |
| SL-J003-2: (S)-1-[(R <sub>P</sub> )-2-(Dicyclohexylphosphino)ferrocenyl]ethyl-dicyclohexylphosphine                                                               | 68 | 16 |
| SL-W001-1: (R)-1-[(R)-2-(2'-Diphenylphosphinophenyl)-ferrocenyl]-ethyl-di-bis(3,5-trifluoromethyl-phenyl)phosphine                                                | 70 | 24 |
| SL-W003-1: (R)-1-[(R)-2-(2'-Diphenylphosphinophenyl)-ferrocenyl]-ethyl-dicyclohexylphosphine                                                                      | 76 | 17 |

|                                                                                                                                |    |    |
|--------------------------------------------------------------------------------------------------------------------------------|----|----|
| SL-W006-1: (R)-1-[(R)-2-(2'-Diphenylphosphinophenyl)-ferrocenyl]-ethyl-di-3,5-xylylphosphine                                   | 75 | 26 |
| (R,R)-QuinoxP*: (R,R)-2,3-Bis(tert-butylmethylphosphino)quinoxaline                                                            | 35 | 4  |
| (S)-(-)-7,7'-Bis(diphenylphosphino)-2,2',3,3'-tetrahydro-1,1'-spirobiindene                                                    | 22 | 26 |
| SL-T001-1: (R)-1-Diphenylphosphino-2-[(R)-a-(N,N-dimethyl-amino)-o-(diphenylphosphinophenyl)methyl]-ferrocene                  | 72 | 15 |
| (+)-Cy-SEGPHOS                                                                                                                 | 30 | 30 |
| (S)-BINAPINE: (3S,3'S,4S,4'S,11bS,11'bS)-(+)-4,4'-Di-t-butyl-4,4',5,5'-tetrahydro-3,3'-bi-3H-dinaphtho[2,1-c:1',2'-e]phosphine | 28 | 5  |
| (S)-PipPhos: (S)-(+)-(3,5-Dioxa-4-phosphacyclohepta[2,1-a;3,4-a']dinaphthalen-4-yl)piperidine                                  | 54 | 13 |
| K15-0026: (1R,2R)-N,N'-BIS[2-(DIPHENYLPHOSPHINO)BENZYL]CYCLOHEXANE-1,2-DIAMINE                                                 | 55 | 4  |
| K15-0088: (1R,2R)-N,N-Bis(2-(di-p-tolylphosphino)-benzyl)cyclohexane-1,2-diamine                                               | 49 | 30 |
| K15-0090: (1R,2R)-N,N-Bis(2-(bis(3,5-dimethylphenyl)-phosphino)benzyl)cyclohexane-1,2-diamine                                  | 22 | 20 |
| K15-0020: 2,2'-BIS[(R)-1,1'-BINAPHTHYL-2,2'-DIMETHYL]PHOSPHINO]DIETHYLAMINE                                                    | 79 | 5  |
| K15-0129: (R)-1-(DIPHENYLPHOSPHINO)-2-AMINO-3-METHYLBUTANE                                                                     | 34 | 9  |
| K15-0131: (R)-1-(DIPHENYLPHOSPHINO)-2-AMINO-3,3-DIMETHYLBUTANE                                                                 | 39 | 15 |
| K15-0128: (S)-1-AMINO-8-(DIPHENYLPHOSPHINO)-1,2,3,4-TETRAHYDRONAPHTHALENE                                                      | 72 | 9  |
| K15-0051: 2-[(11BS)-3H-BINAPHTHO[2,1-C:1',2'-E]PHOSPHEPIN-4(5H)-YL]ETHANAMINE                                                  | 47 | 14 |
| K15-0046: (1R,2R)-2-(DIPHENYLPHOSPHINO)-1,2-DIPHENYLETHYLAMINE                                                                 | 26 | 23 |
| K15-0137: (1R,2R)-2-(DIPHENYLPHOSPHINO)-1-AMINOCYCLOHEXANE                                                                     | 42 | 15 |
| K15-0100: (1R,2R)-1-[(4S,11BR)-3,5-DIHYDRO-4H-DINAPHTHO[2,1-C:1',2'-E]PHOSPHEPIN-4-YL]-1-PHENYLPROPAN-2-AMINE                  | 38 | -  |
| (1S,2S)-(2-METHYLAMINO-1-PHENYLPROPYL)DIPHENYLPHOSPHINE                                                                        | 24 | -  |

[a] Absolute value was calculated on e.e.

Repeat hits on lab scales with e.e >70%

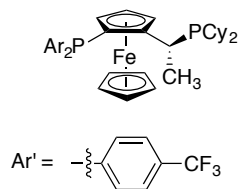

**SL-J204-1**  
Assay yield: 75%  
e.e. = 70%

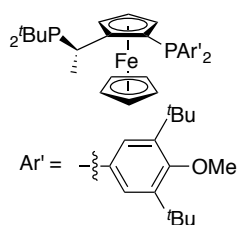

**SL-J203-2**  
Assay yield: 63%  
e.e. = 71%

## Lab Scale and Optimization

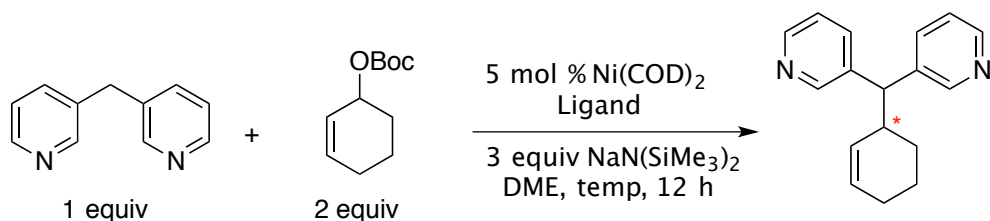

| entry | Ligand    | Ni/Ligand (mol %) | temp(°C) | yield <sup>[b]</sup> (%) | e.e. <sup>[c]</sup> (%) |
|-------|-----------|-------------------|----------|--------------------------|-------------------------|
| 1     | SL-J203-2 | 5/10              | 24       | 66                       | 70                      |
| 2     | SL-J204-1 | 5/10              | 24       | 85                       | 73                      |
| 3     | SL-J204-1 | 5/10              | 0        | 80                       | 93                      |
| 4     | SL-J204-1 | 5/7.5             | 0        | 93                       | 92                      |
| 5     | SL-J204-1 | 5/5               | 0        | 92(91) <sup>[d]</sup>    | 92                      |

[a] Reaction conducted on a 0.1 mmol scale. [b] Yield determined by <sup>1</sup>H NMR spectroscopy of the crude reaction mixture. [c] Crude e.e. determined by chiral-HPLC. [d] Isolated yield.

## References:

- (1) Park, B. S.; Lee, S. W.; Kim, I. T.; Tae, J. S.; Lee, S. H. *Heteroatom Chem.* **2011**, *23*, 66.
- (2) Engel, J. Insecticidal Perhaloalkylvinylcyclopropanecarboxylates. US Patent US4332815 (A1), **1982**.
- (3) Khatib, S.; Tal, S.; Godsi, O.; Peskin, U.; Eichen, Y. *Tetrahedron* **2000**, *56*, 6753.
- (4) Alonso, E.; Guijarro, D.; Martínez, P.; Ramón, D. J.; Yus, M. *Tetrahedron* **1999**, *55*, 11027.
- (5) Trost, B. M.; Malhotra, S.; Olson, D. E.; Maruniak, A.; Bois, Du, J. *J. Am. Chem. Soc.* **2009**, *131*, 4190.
- (6) Zhang, J.; Stanciu, C.; Wang, B.; Hussain, M. M.; Da, C.-S.; Carroll, P. J.; Dreher, S. D.; Walsh, P. J. *J. Am. Chem. Soc.* **2011**, *133*, 20552.
- (7) Yasuda, M.; Saito, T.; Ueba, M.; Baba, A. *Angew. Chem., Int. Ed.* **2004**, *43*, 1414.
- (8) Sha, S.-C.; Zhang, J.; Carroll, P. J.; Walsh, P. J. *J. Am. Chem. Soc.* **2013**, *135*, 17602.
- (9) De, S. K.; Gibbs, R. A. *Tetrahedron Lett.* **2005**, *46*, 8345.
- (10) Naga, N.; Sakai, H.; Usui, C.; Tomoda, H. *J. Polym. Sci. A Polym. Chem.* **2010**, *48*, 3542.
- (11) Okajima, M.; Soga, K.; Watanabe, T.; Terao, K.; Nokami, T.; Suga, S.; Yoshida, J.-I. *Bull. Chem. Soc. Jpn.* **2009**, *82*, 594.
- (12) Podder, S.; Choudhury, J.; Roy, S. *J. Org. Chem.* **2007**, *72*, 3129.

NMR Spectra

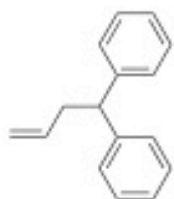

3aa

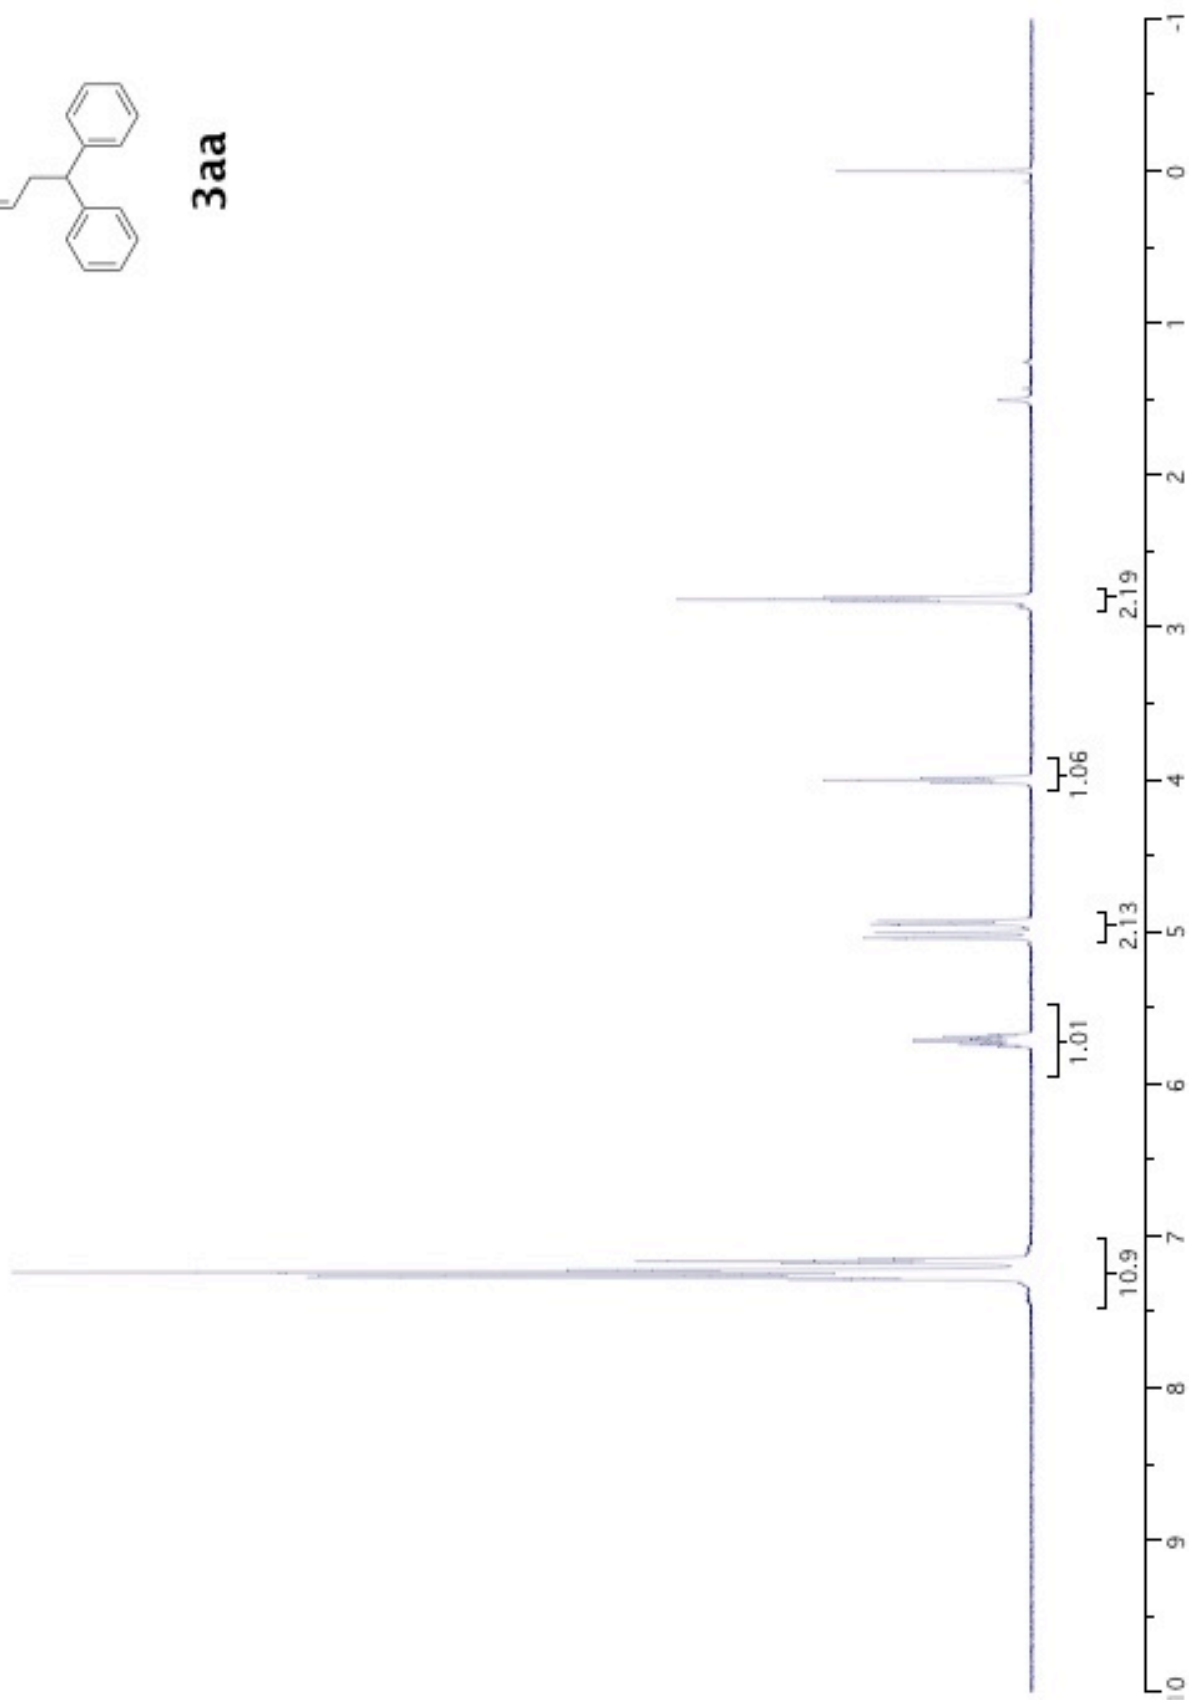

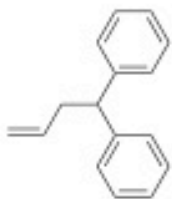

**3aa**

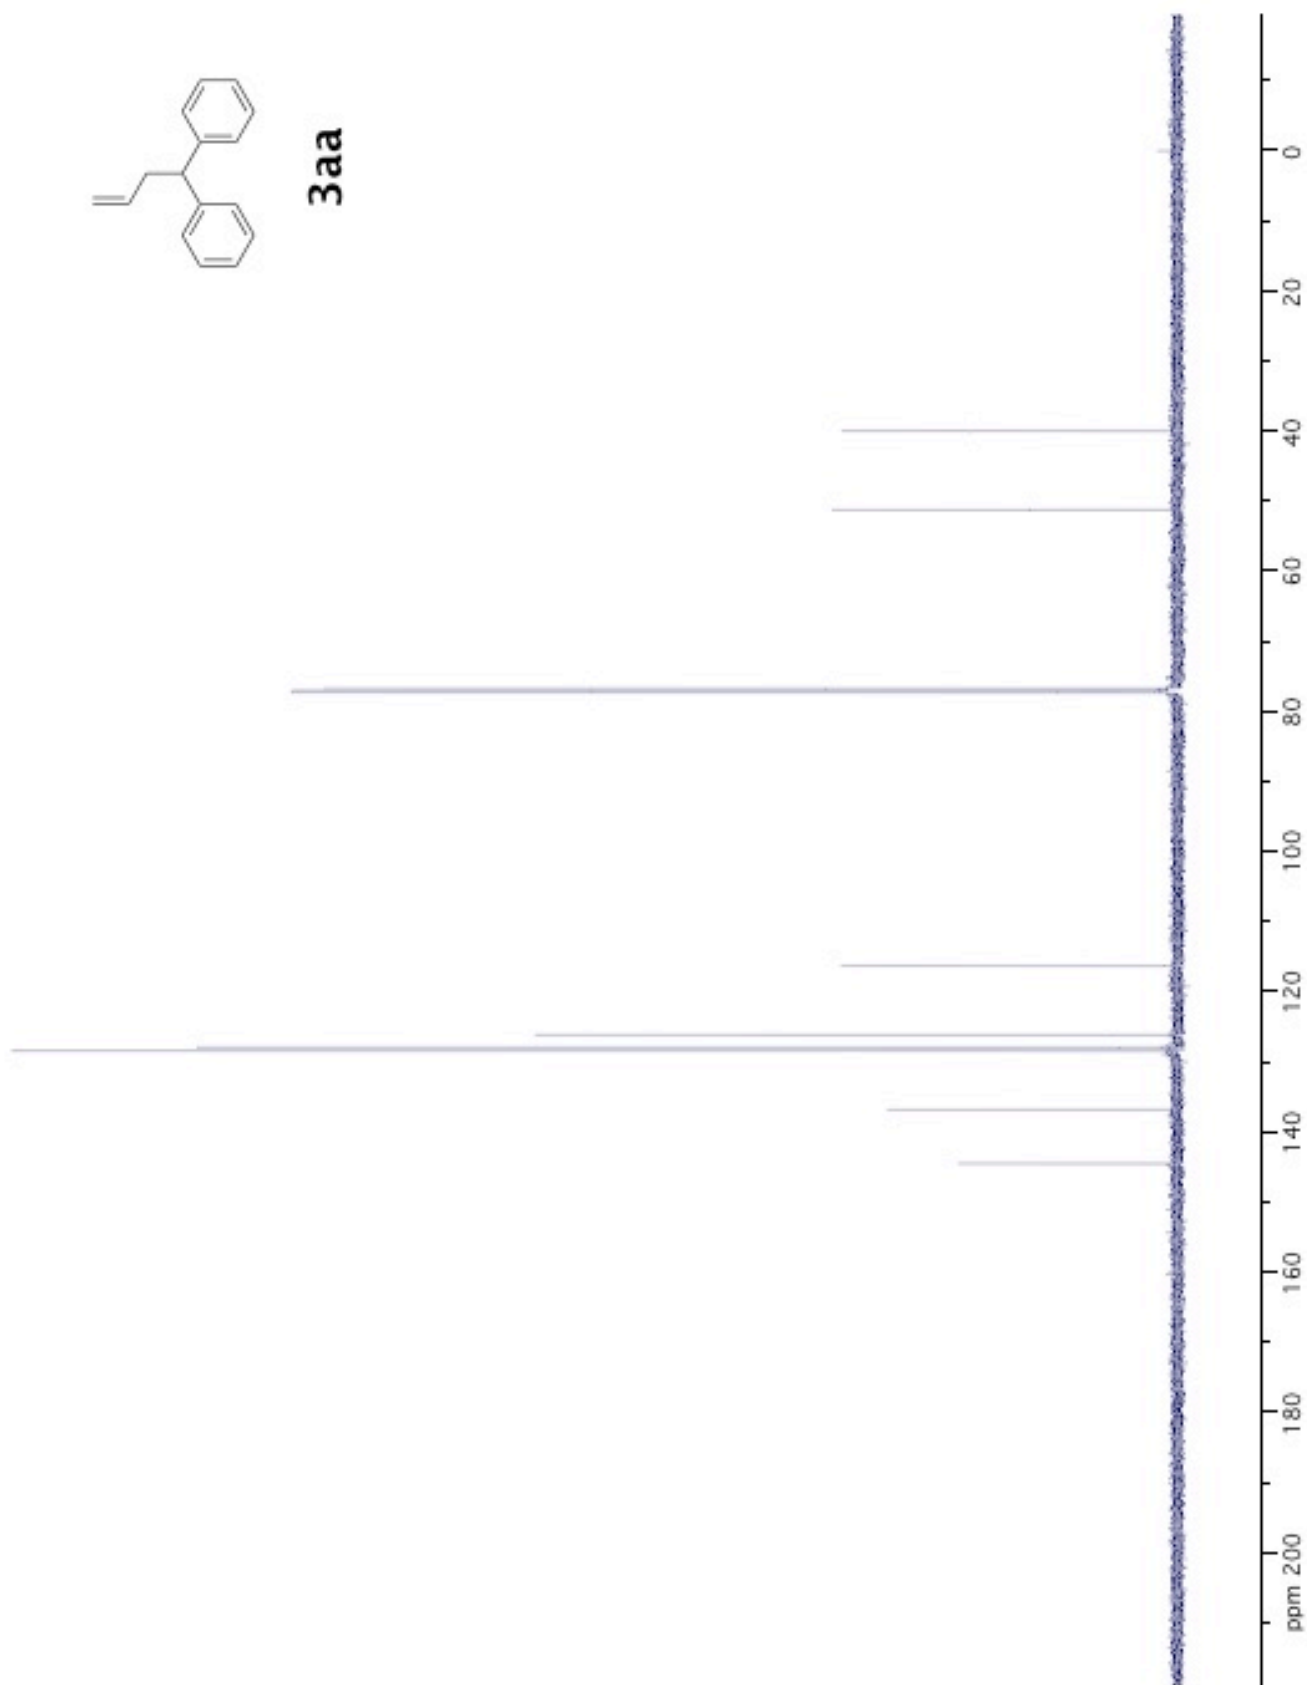

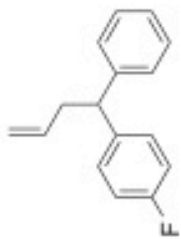

**3ba**

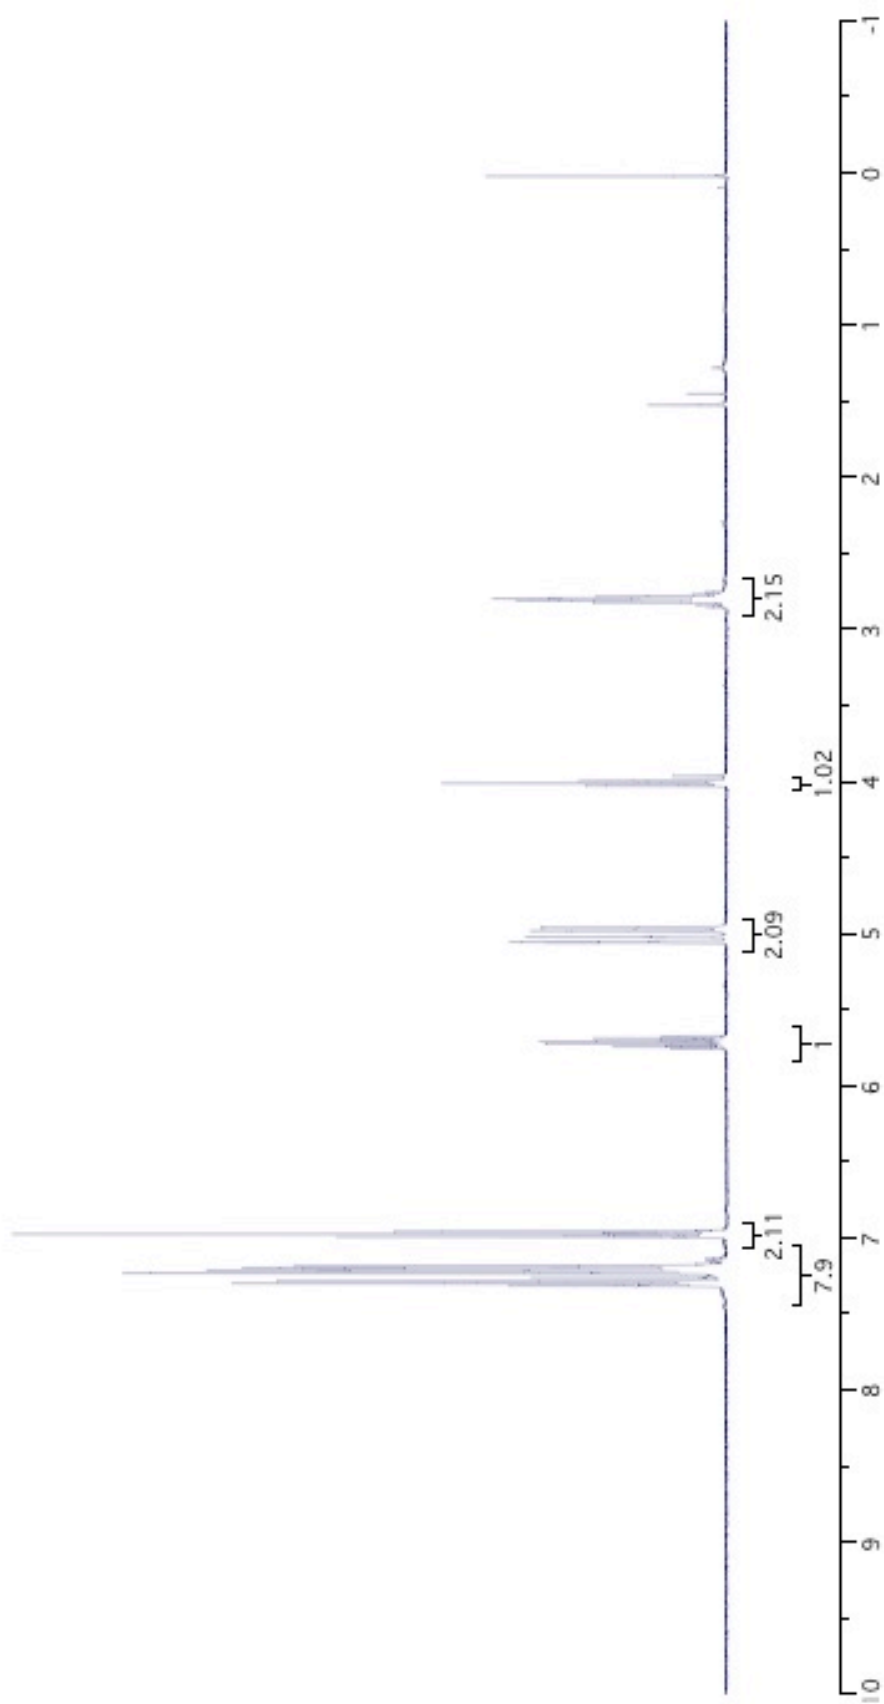



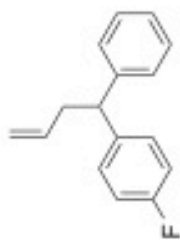

**3ba**

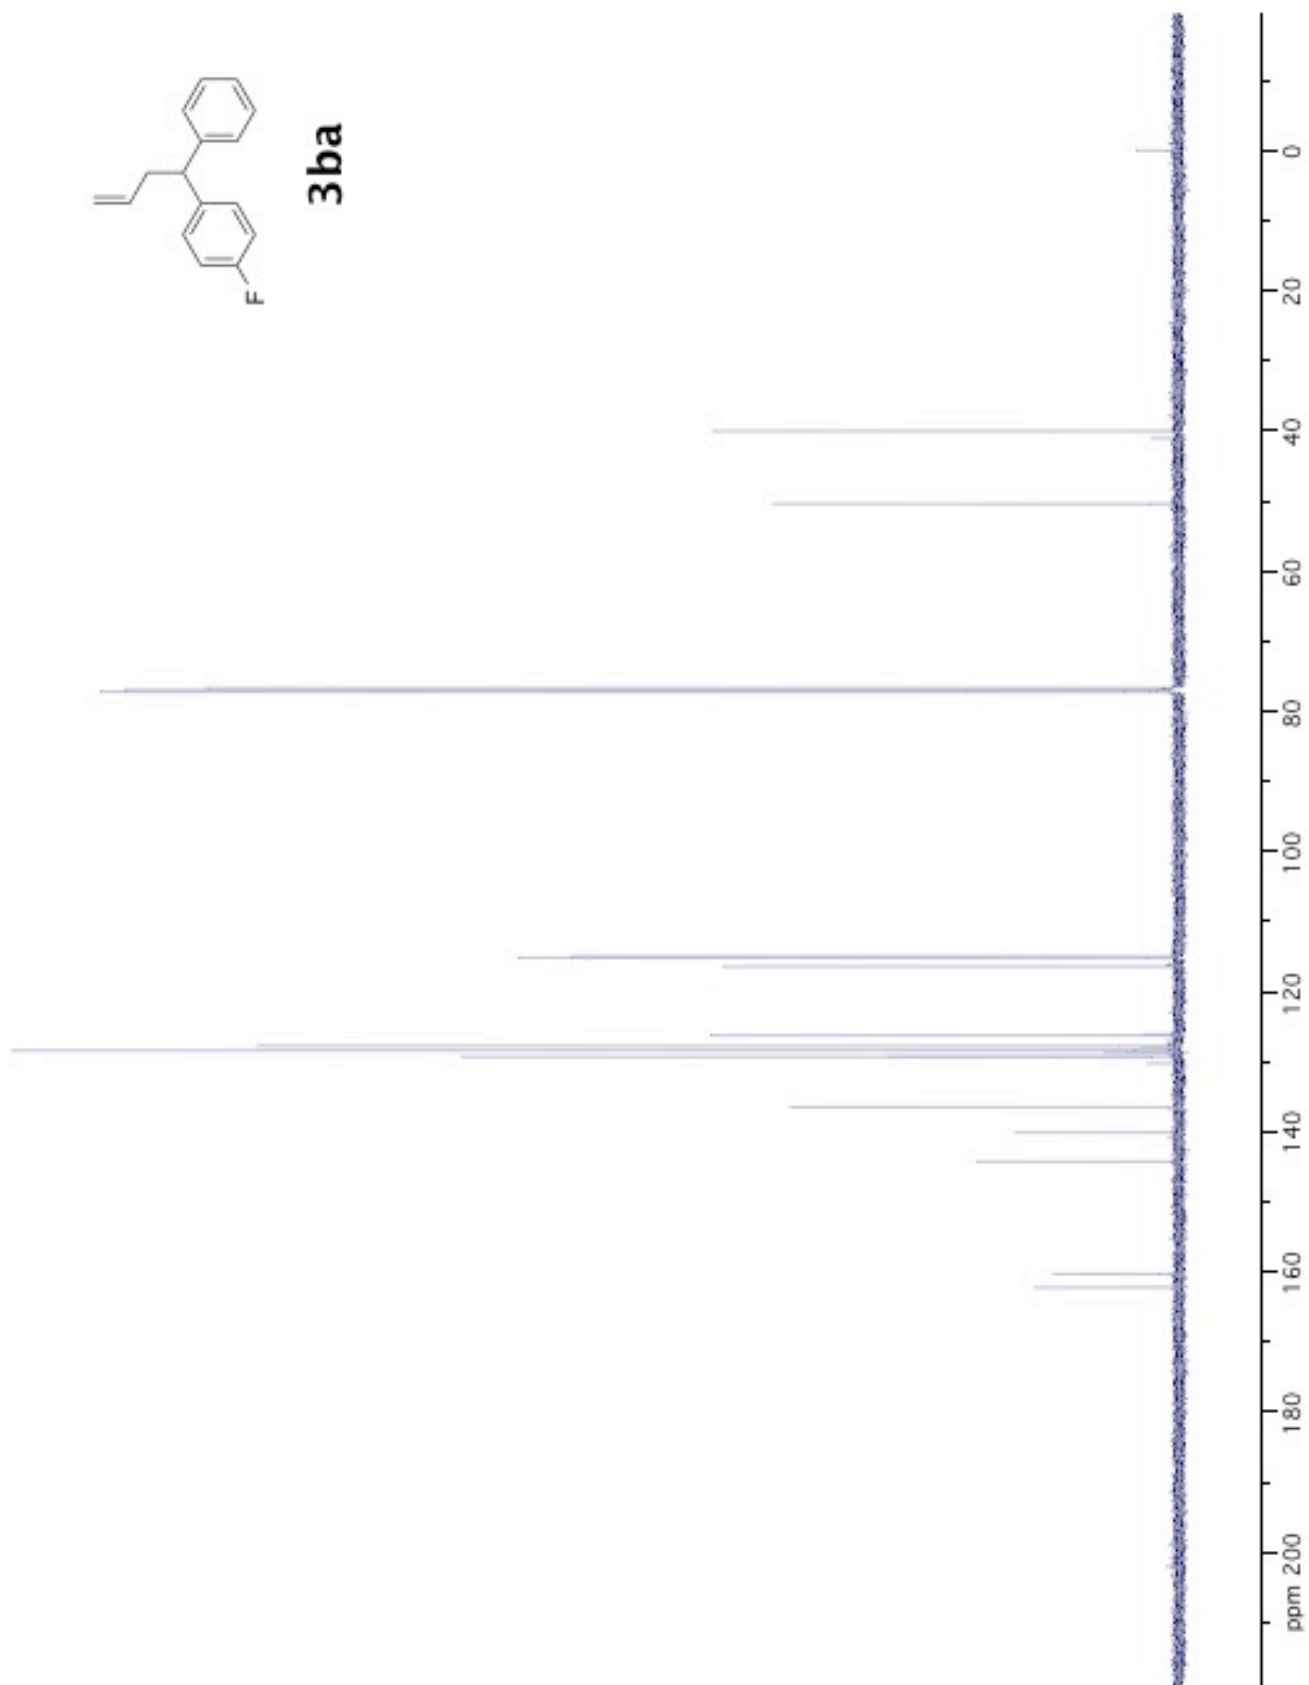

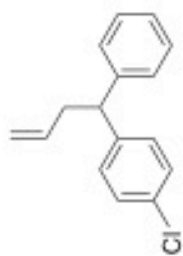

**3ca**

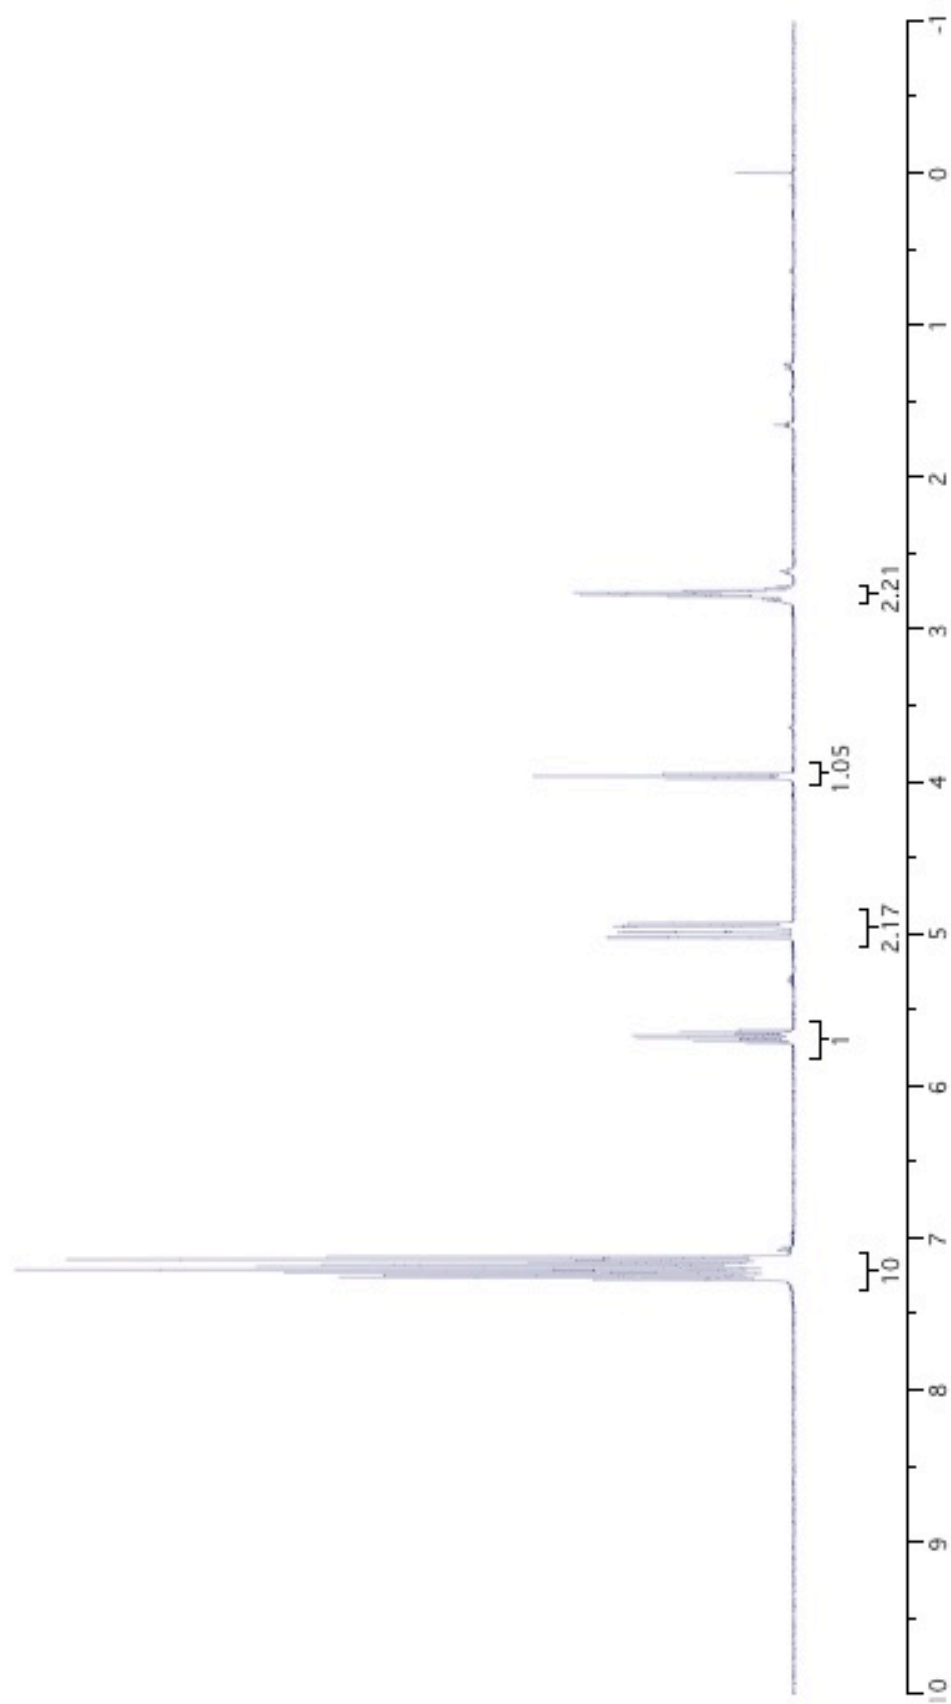

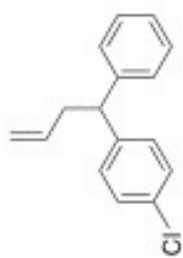

**3ca**

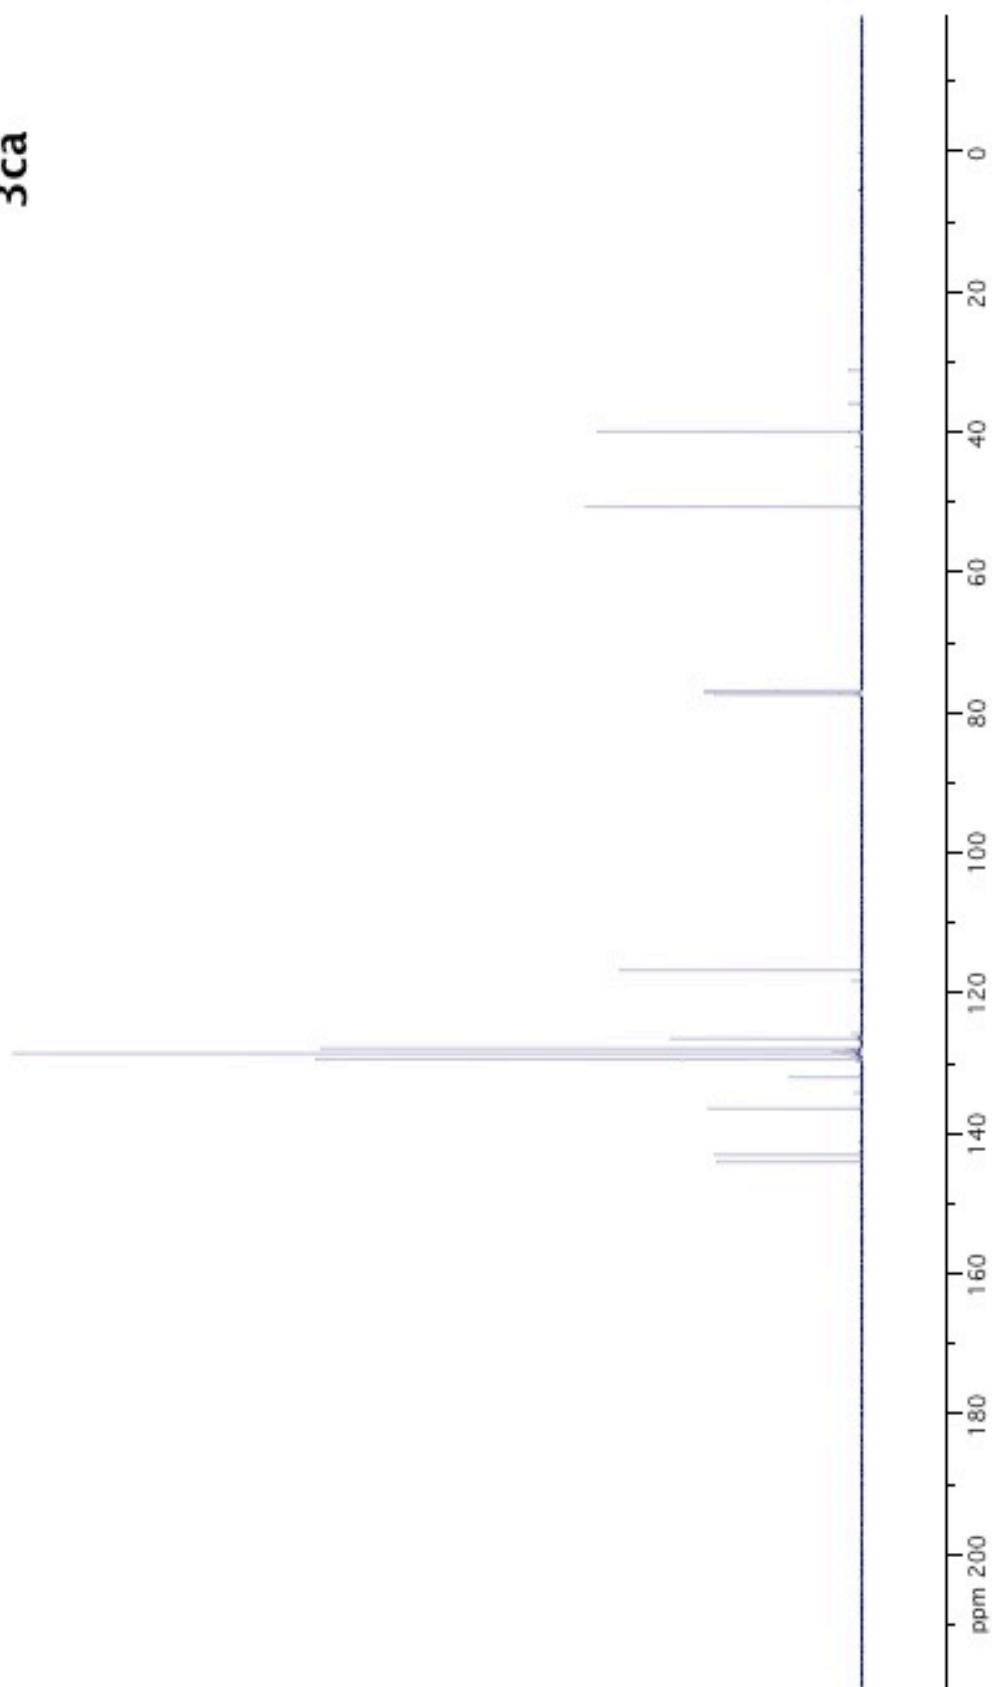

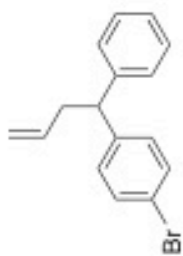

**3da**

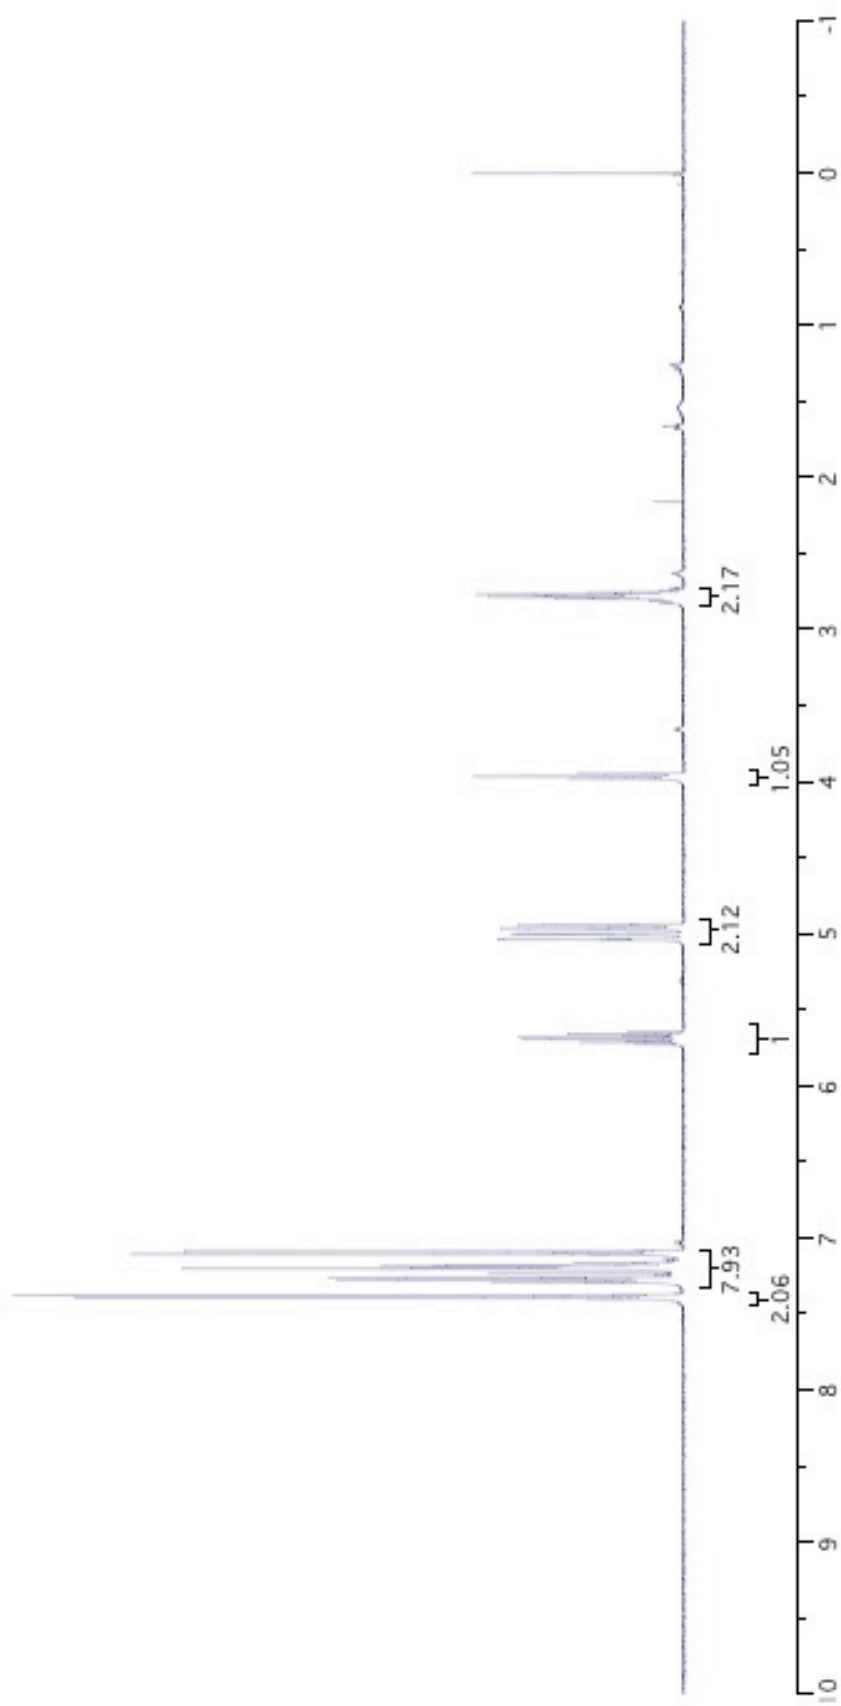

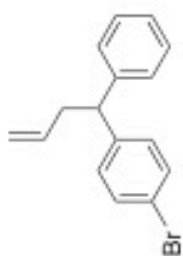

**3da**

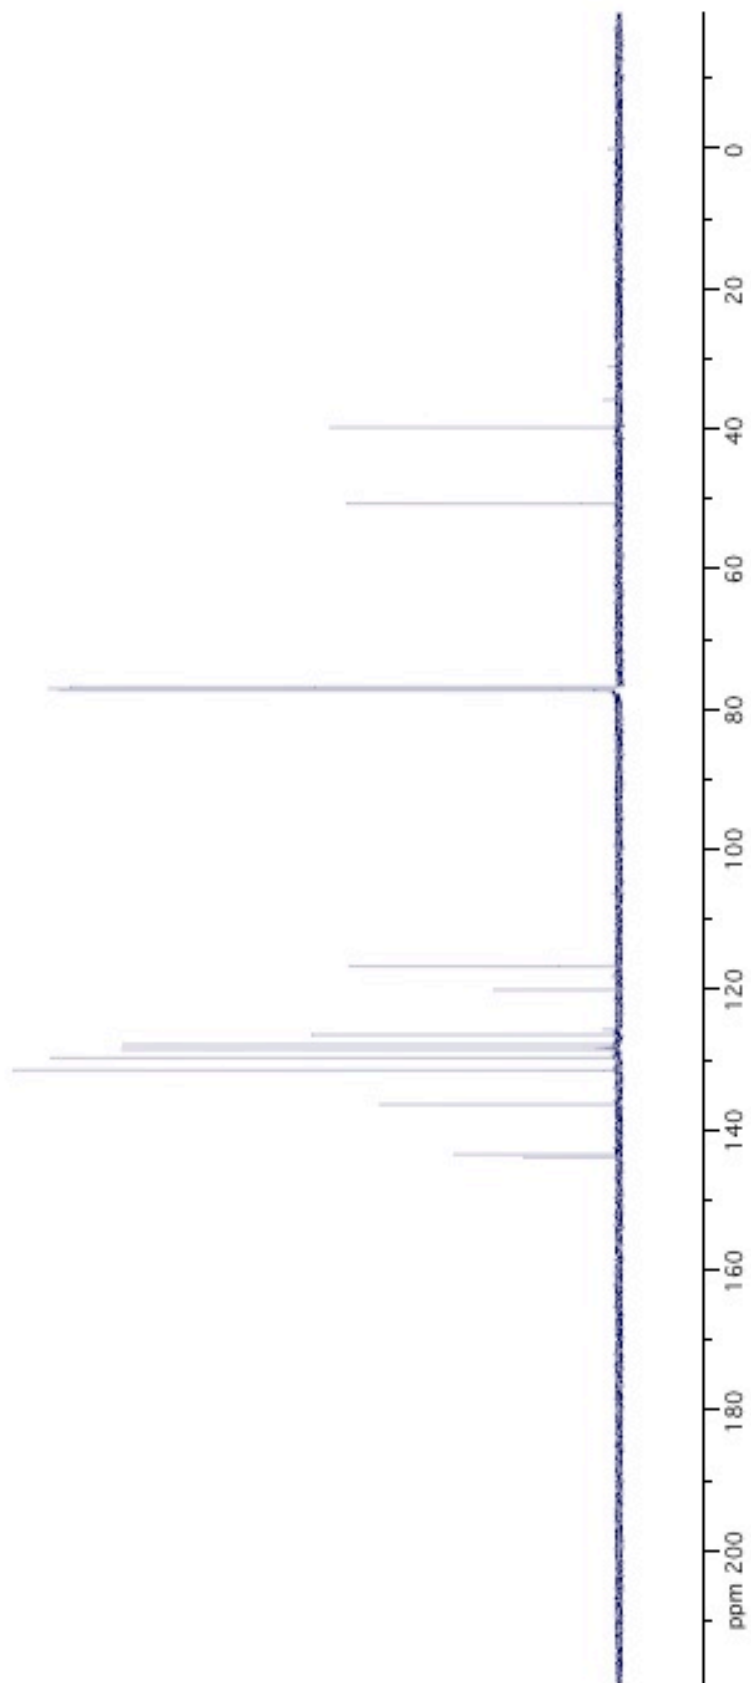

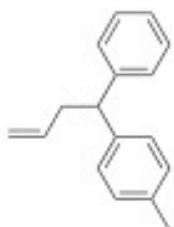

**3ea**

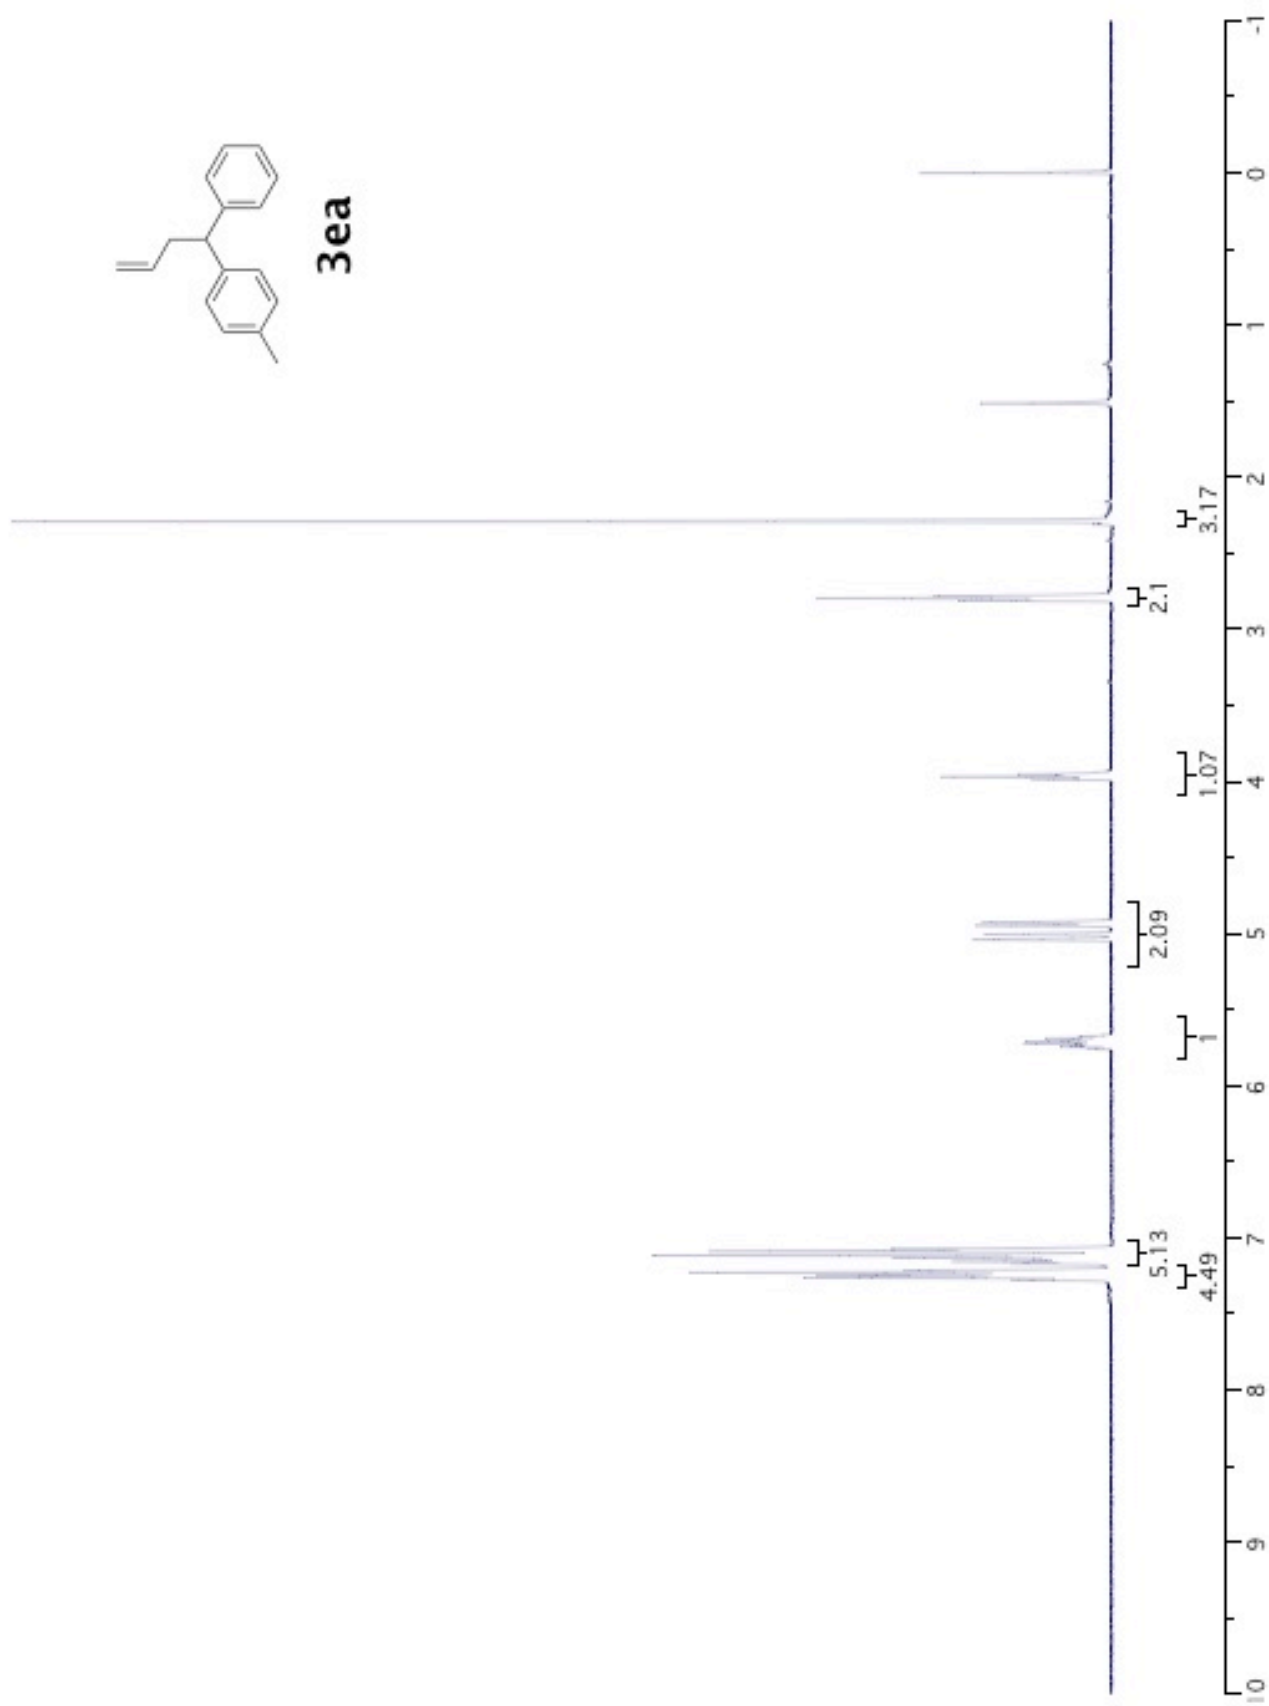

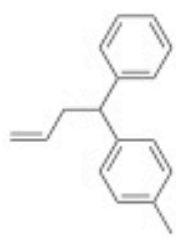

**3ea**

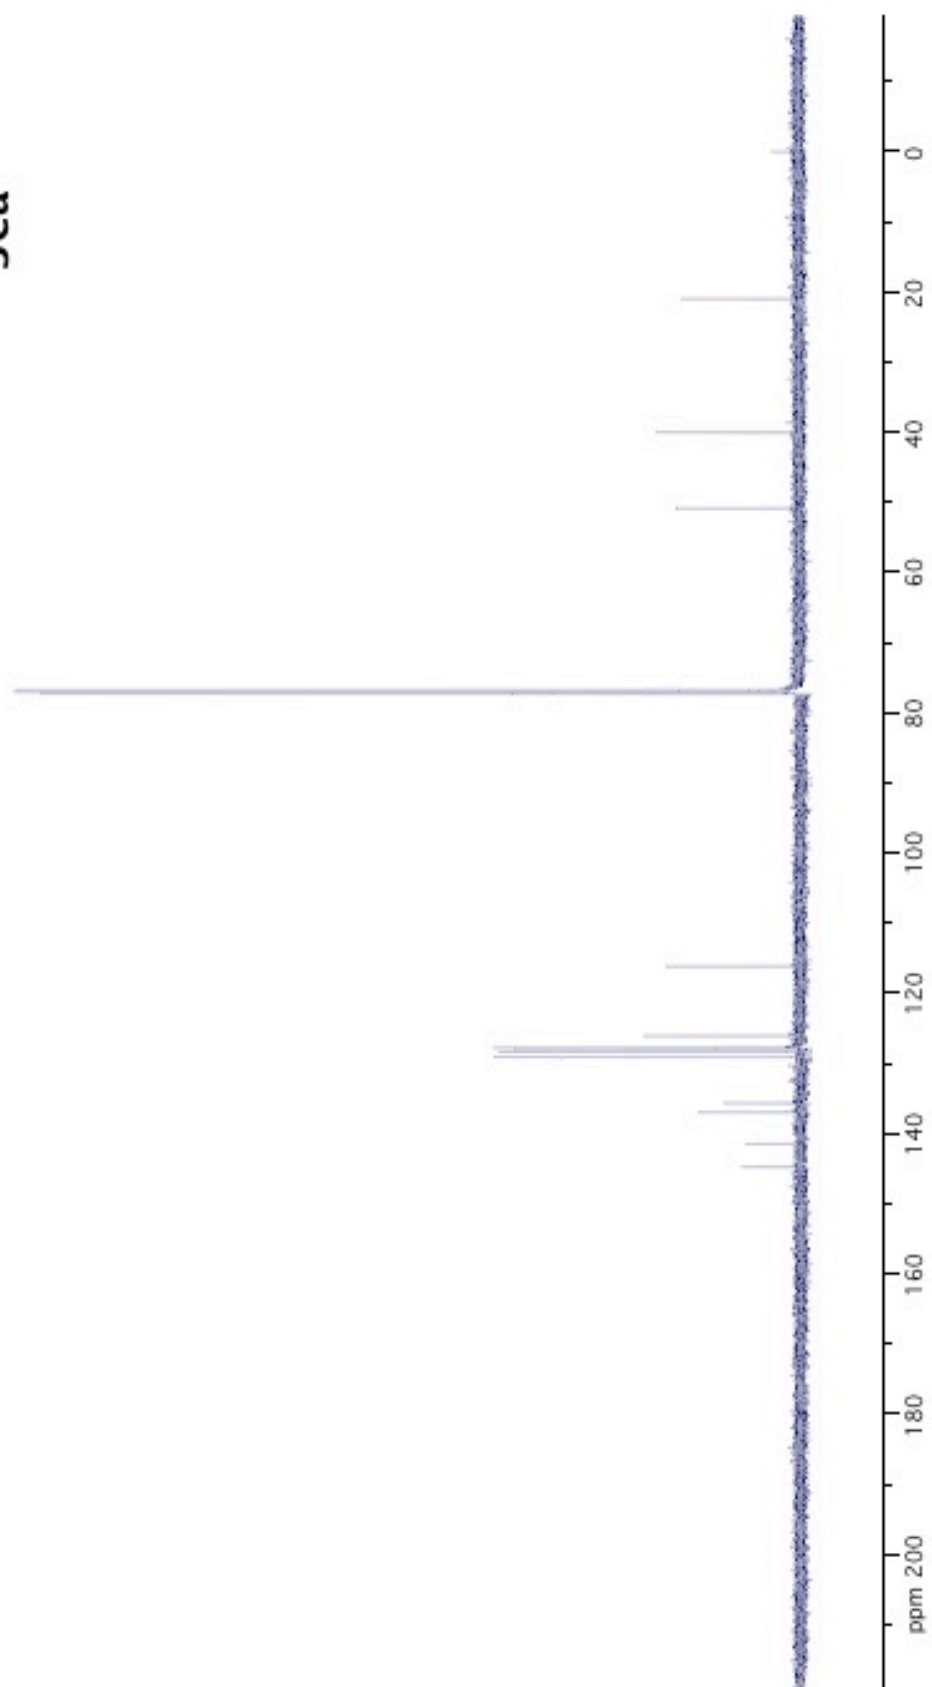

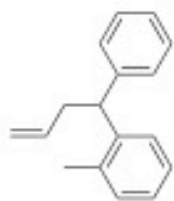

**3fa**

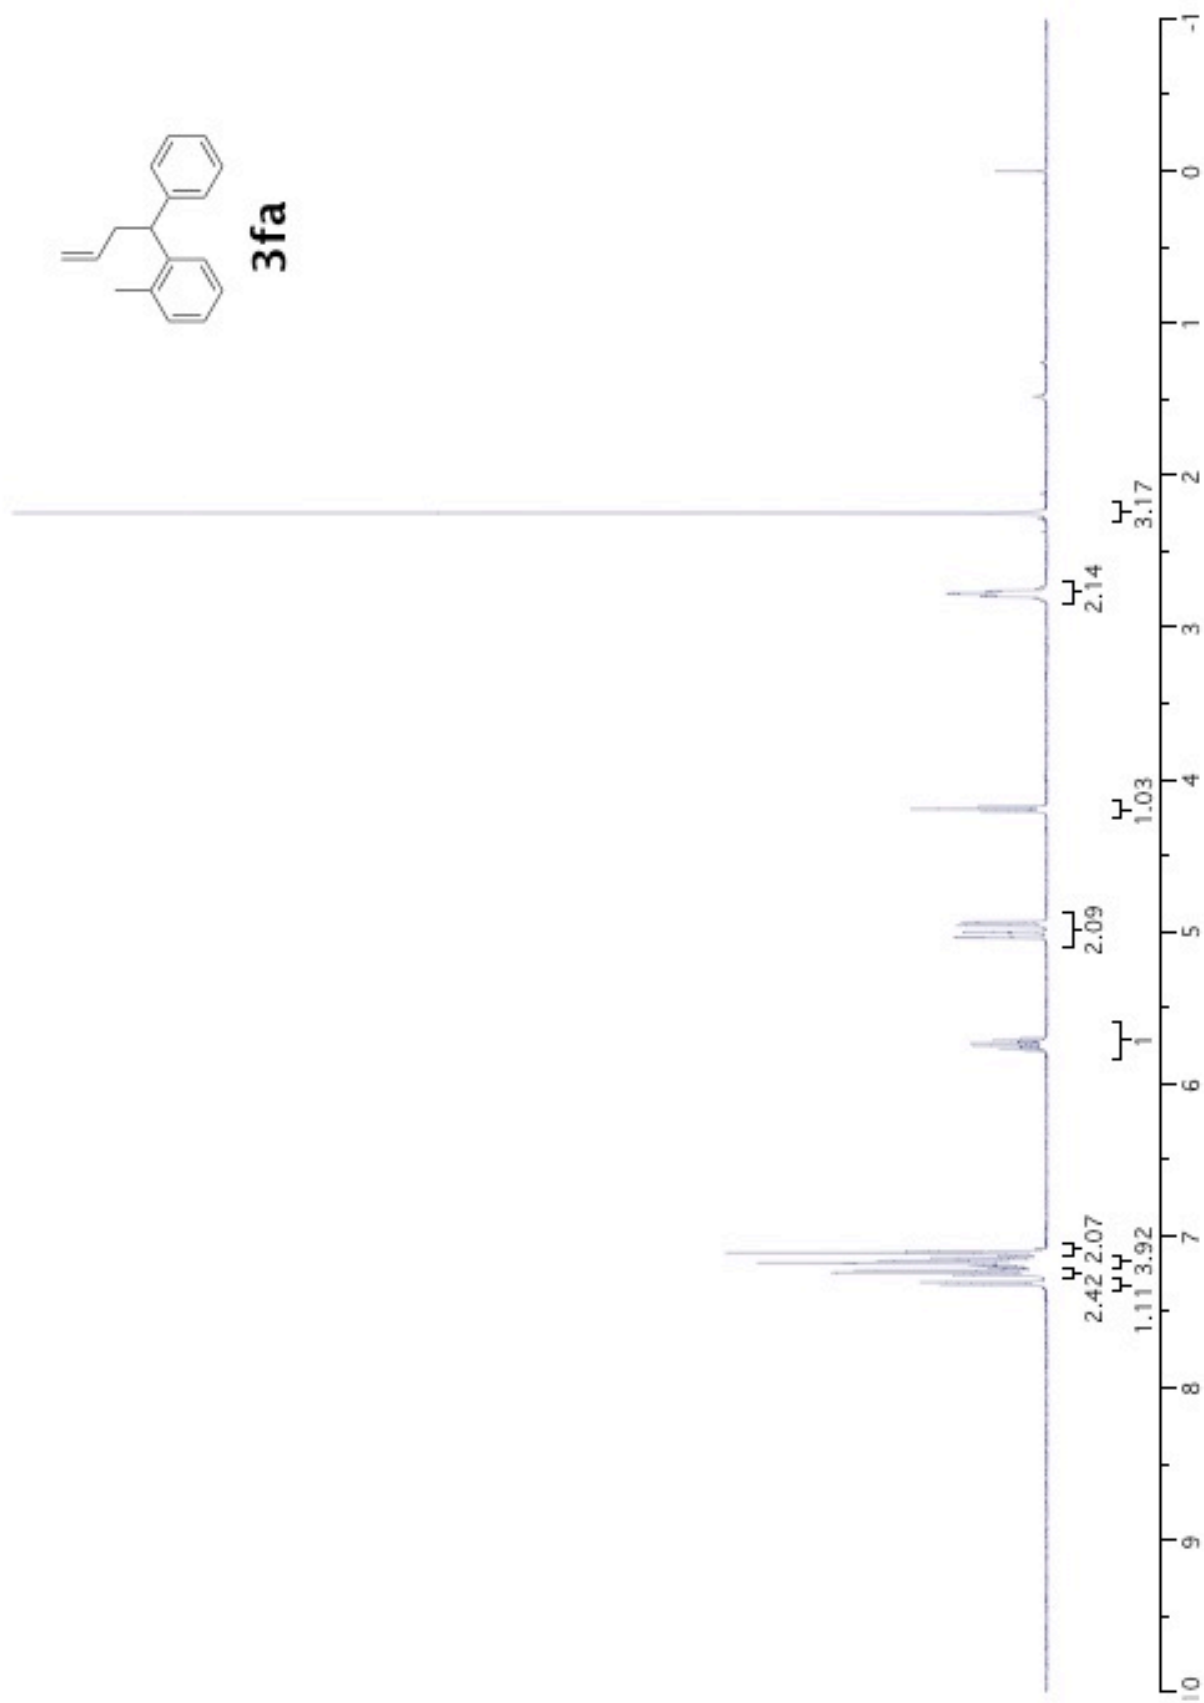



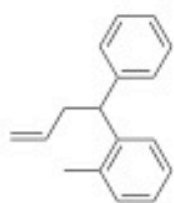

**3fa**

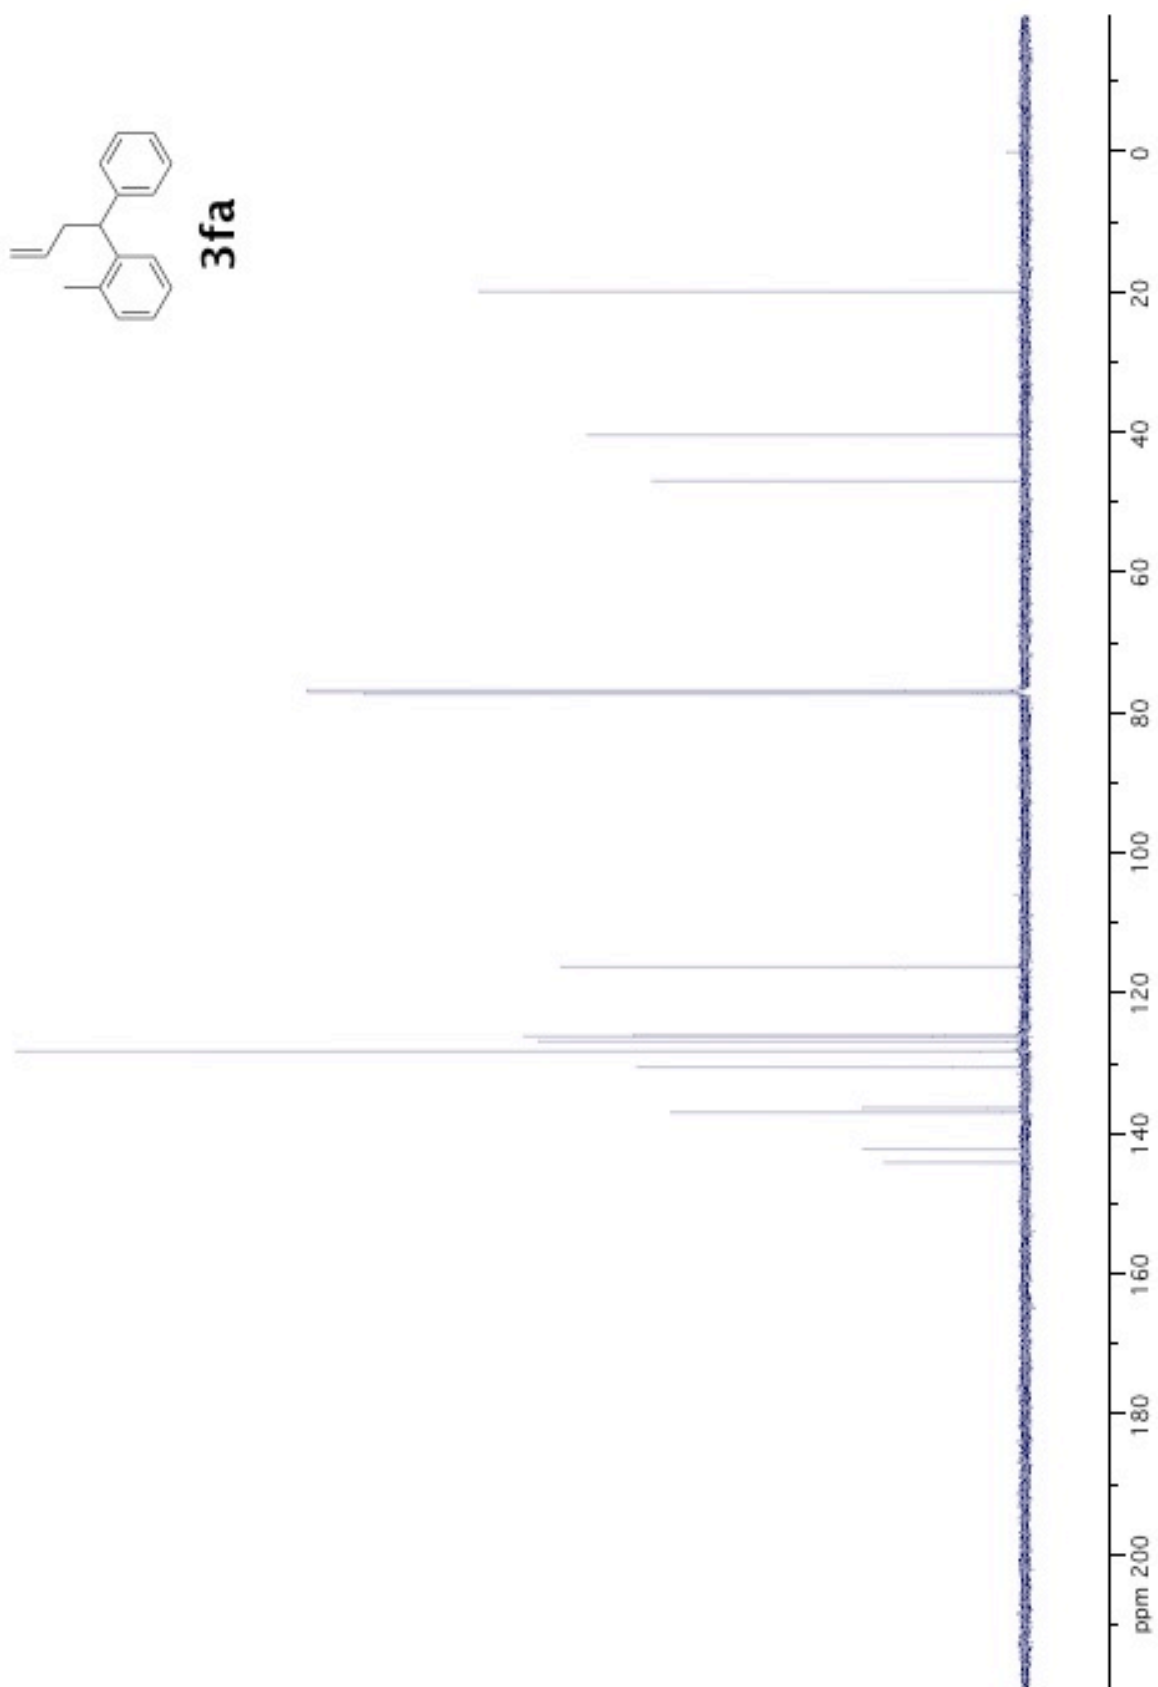

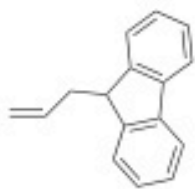

**3ga**

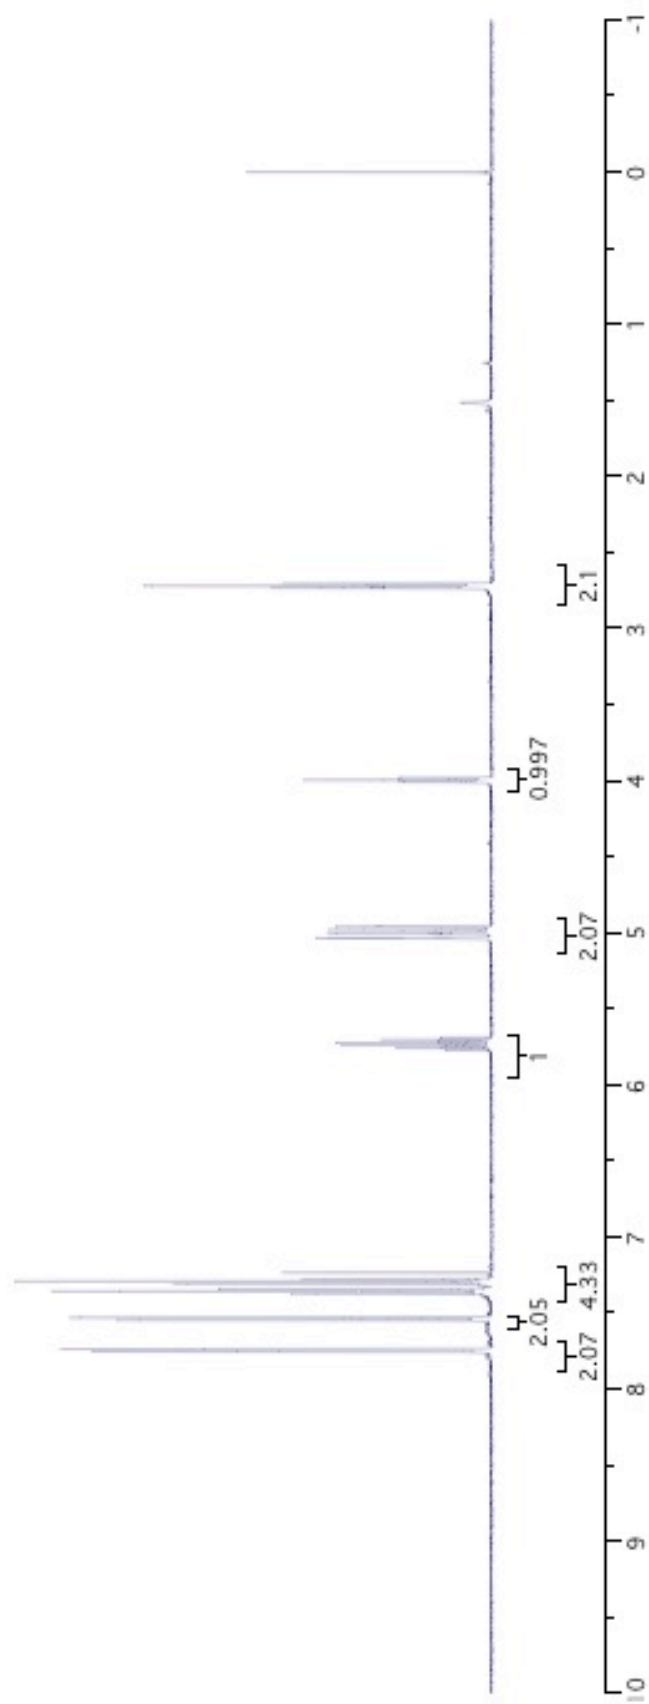

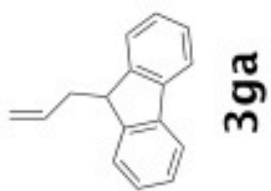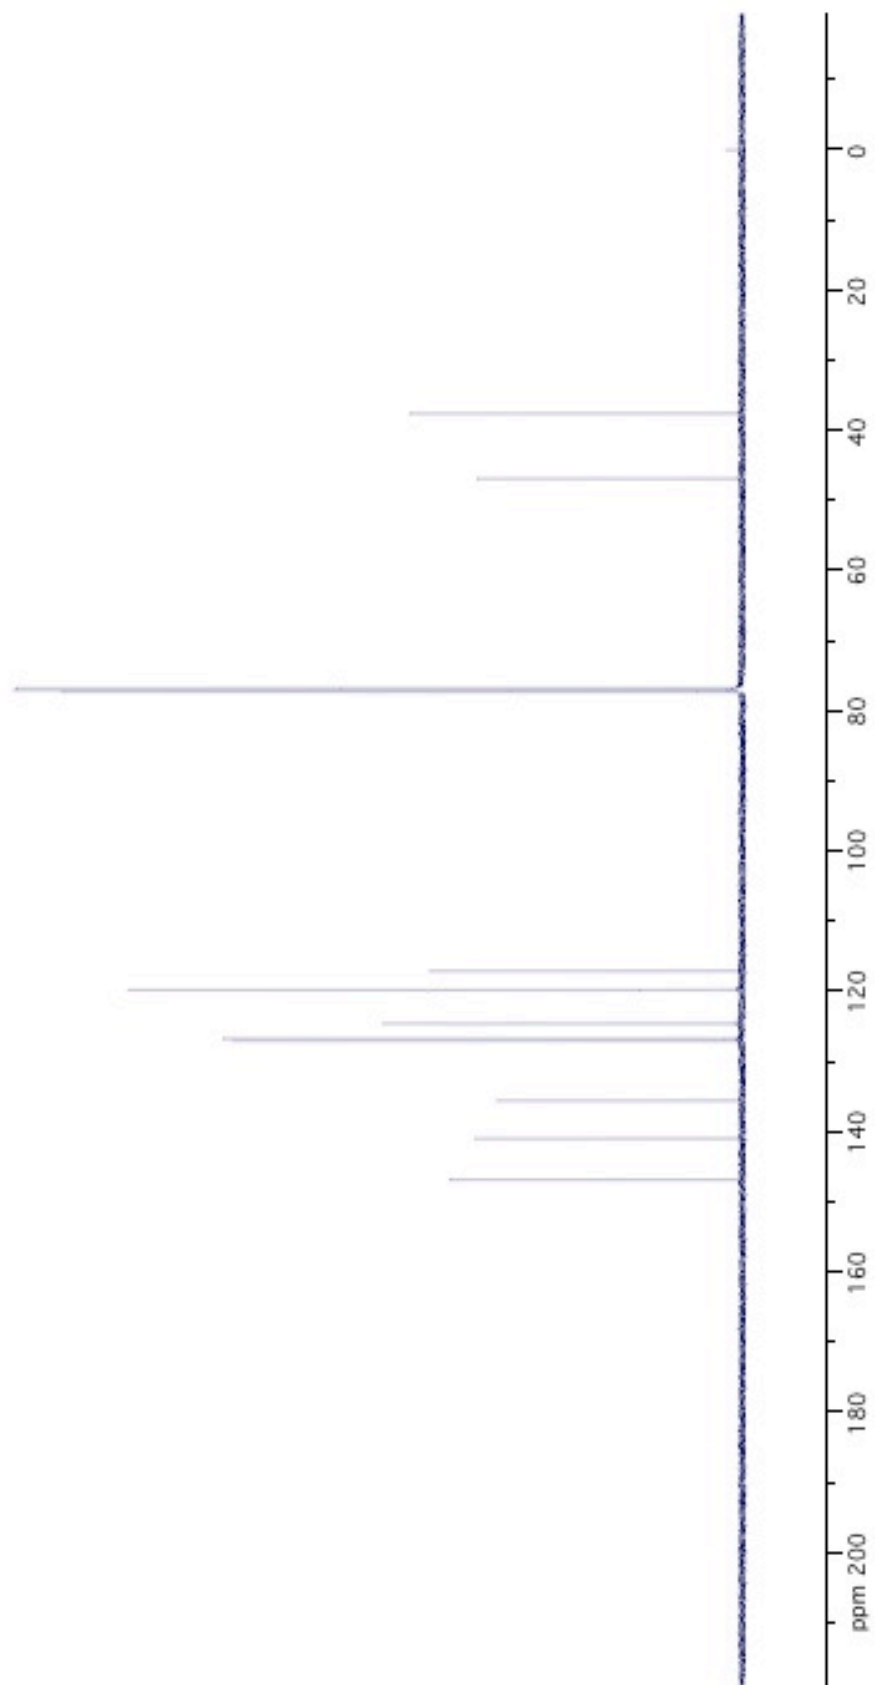

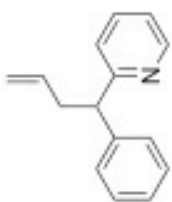

**5aa**

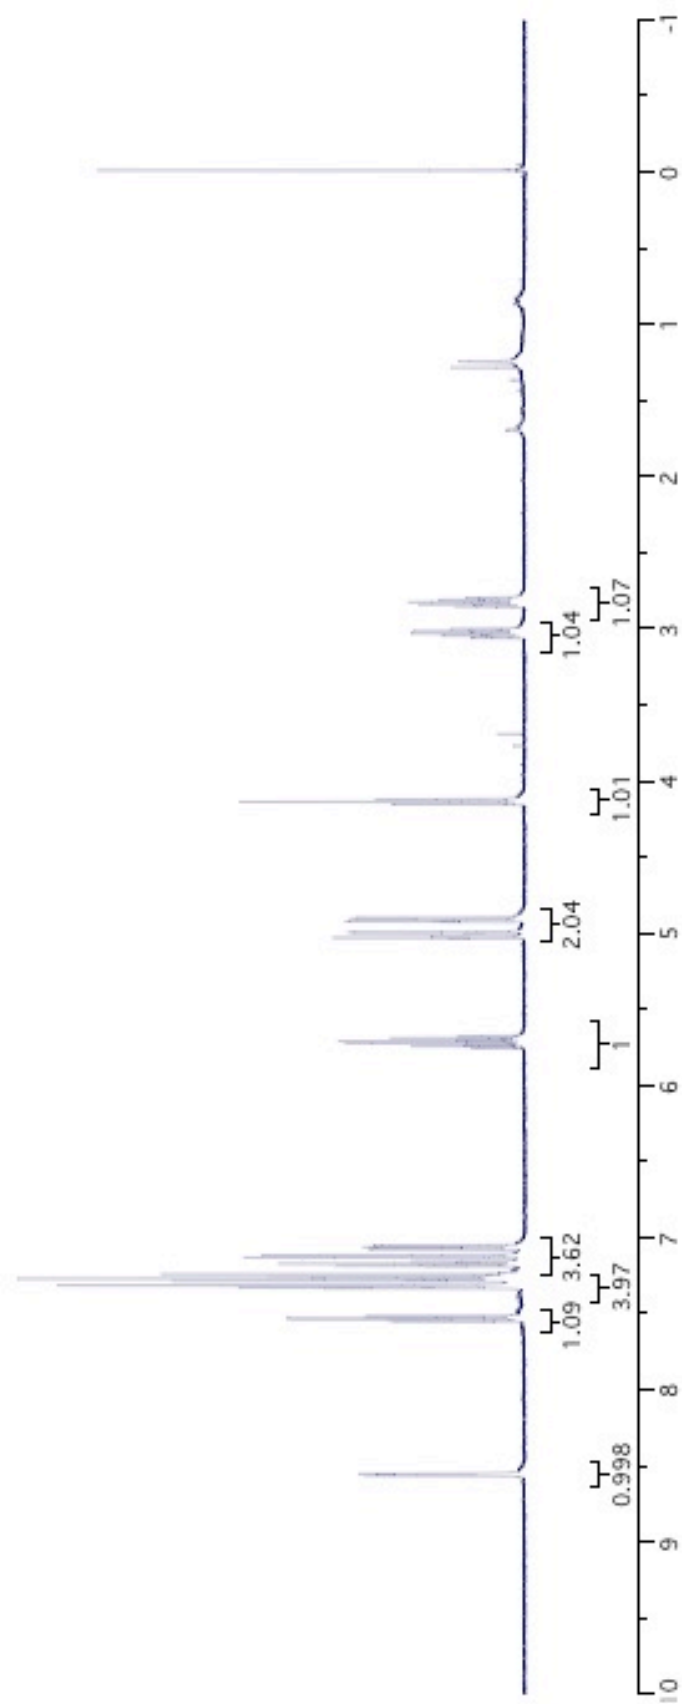

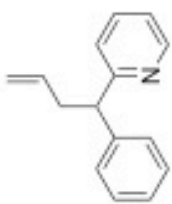

**5aa**

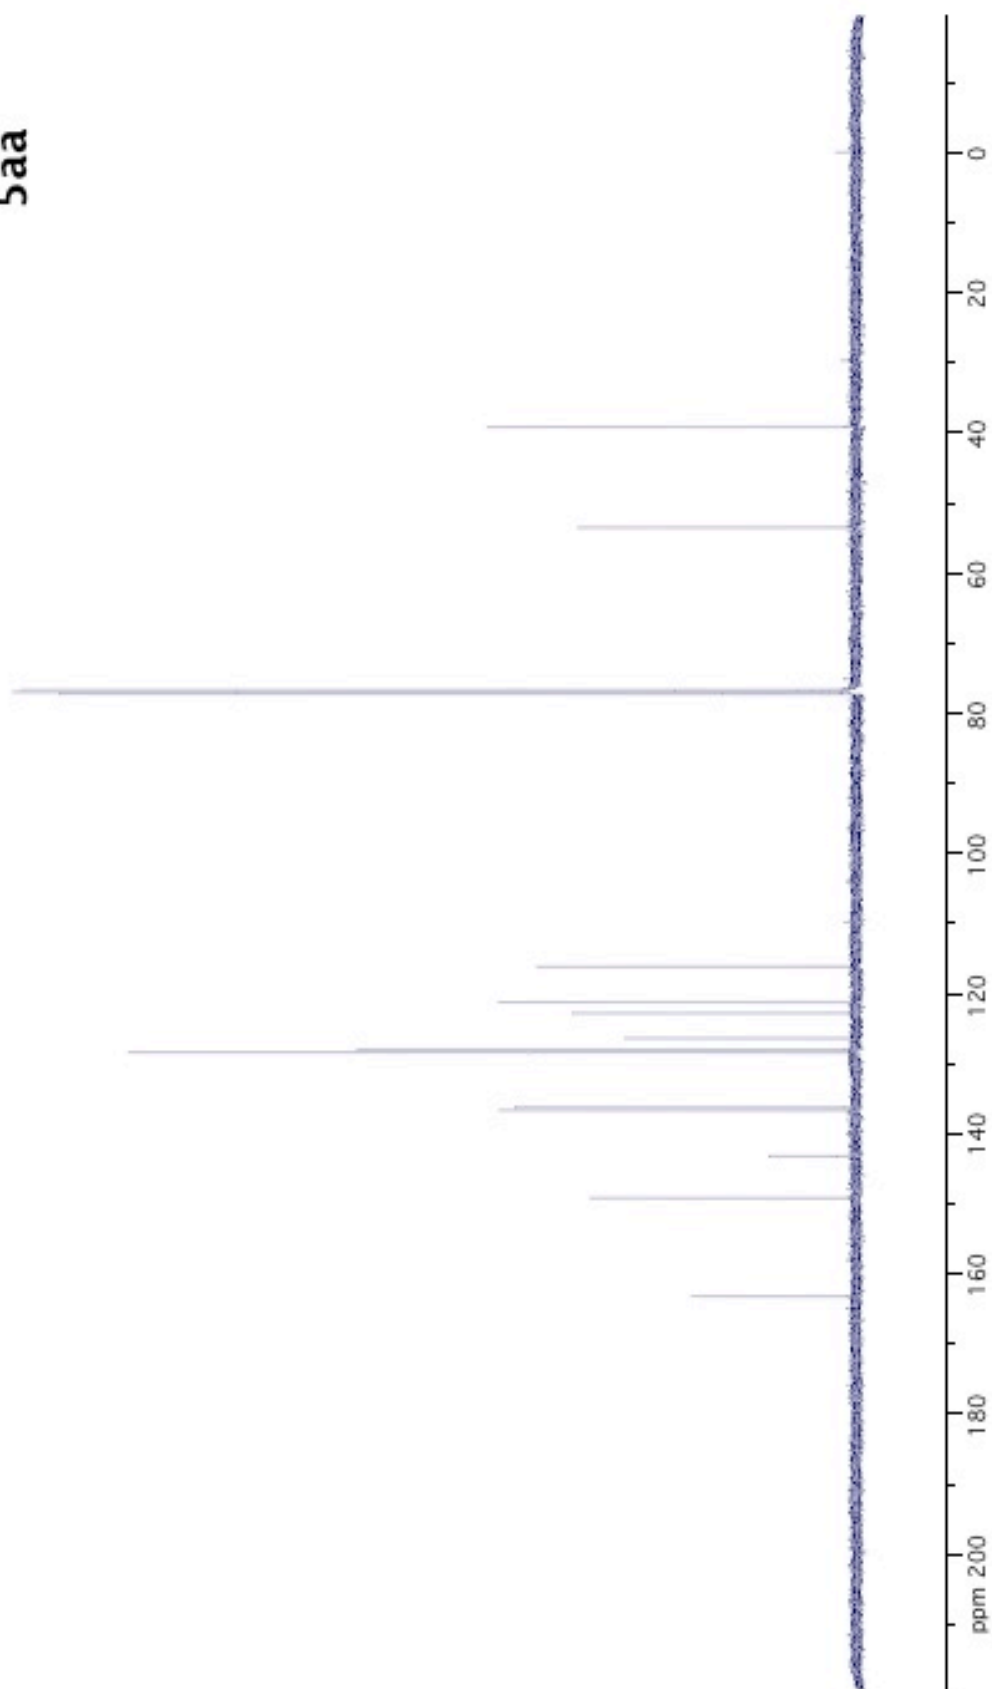

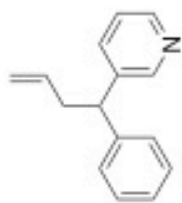

**5ba**

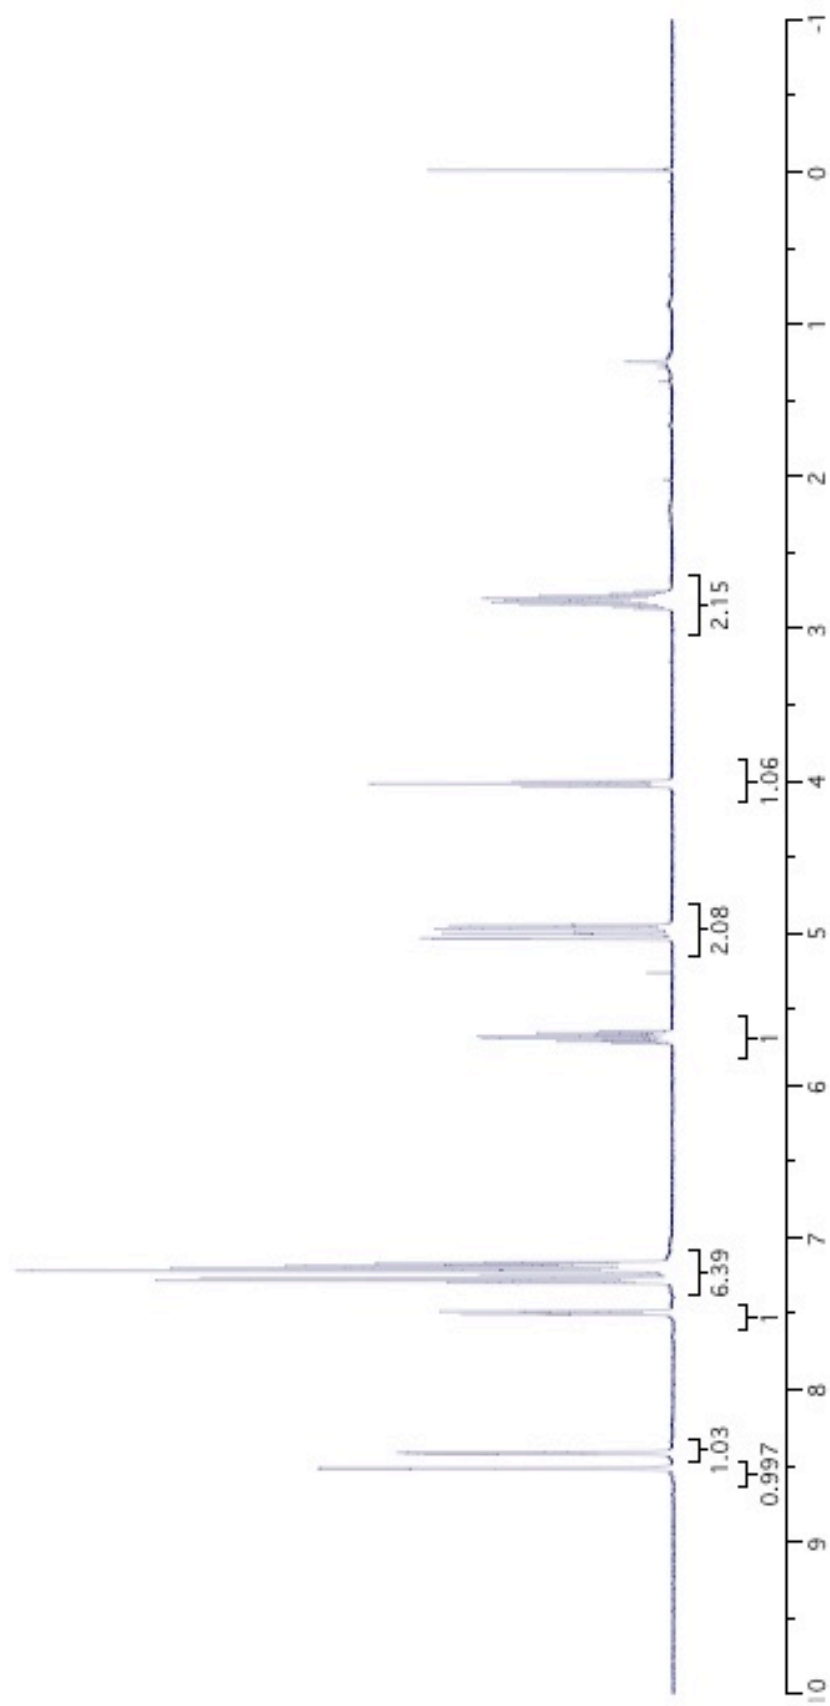

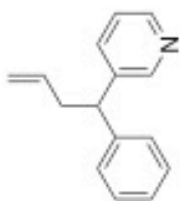

**5ba**

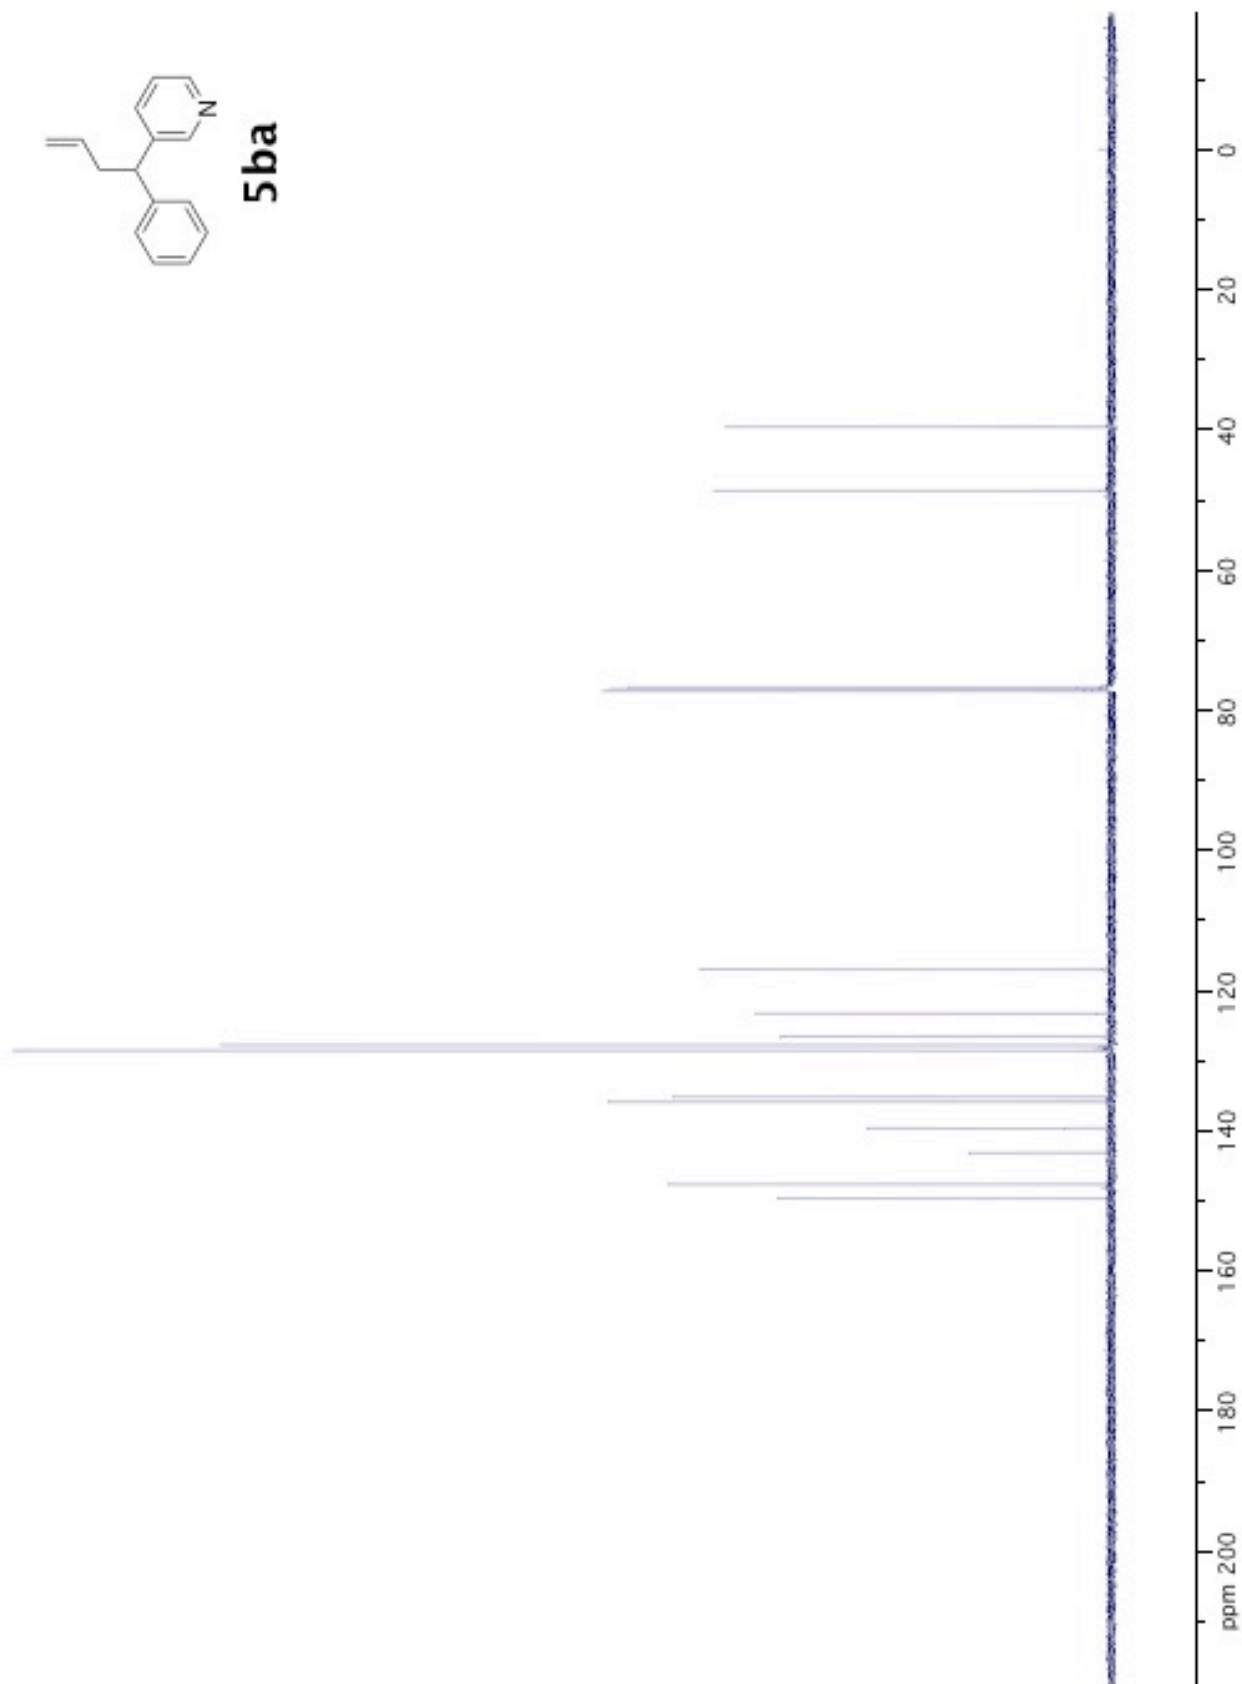

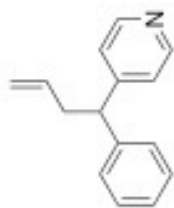

**5ca**

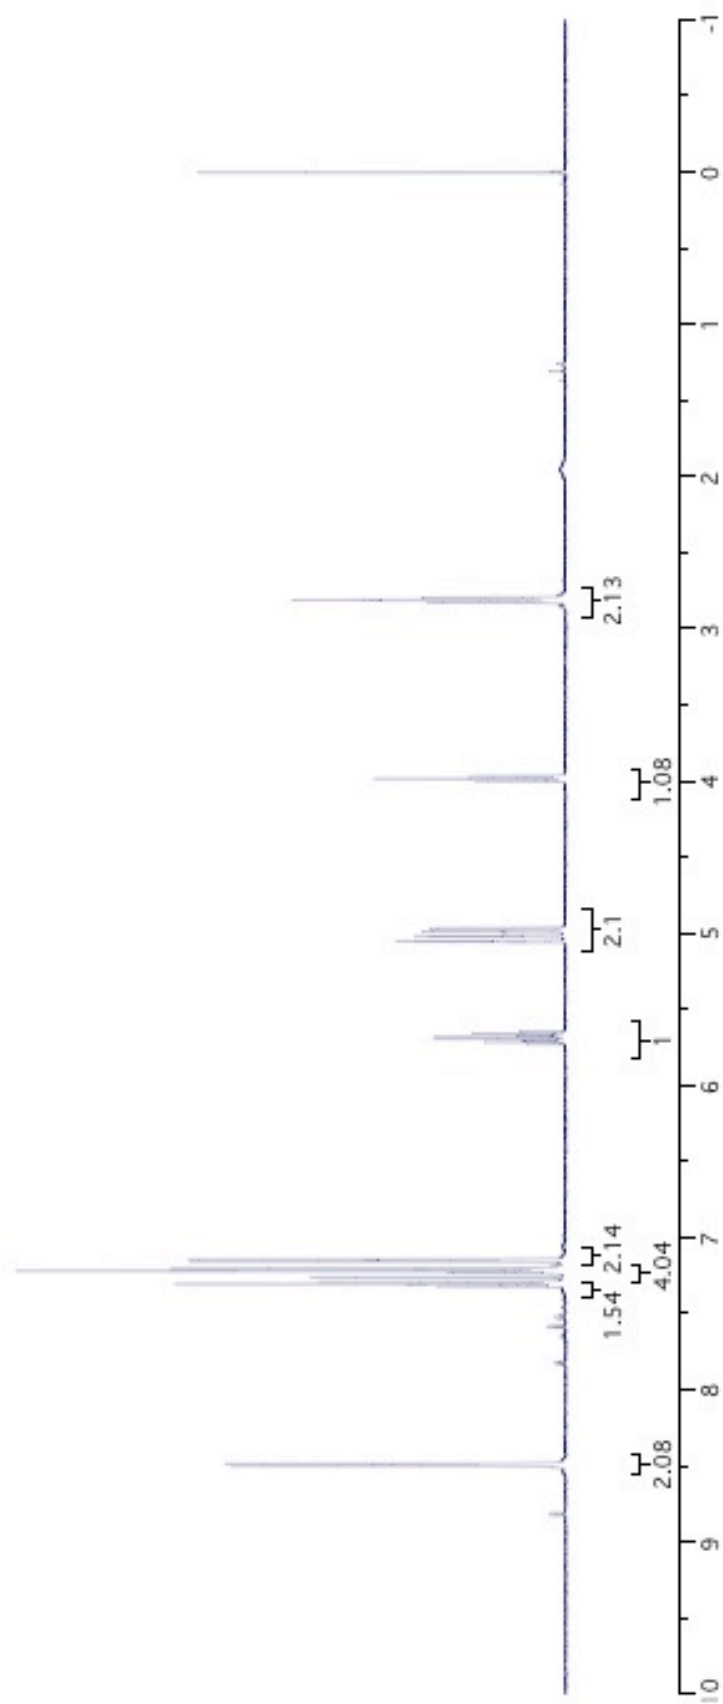





5ca

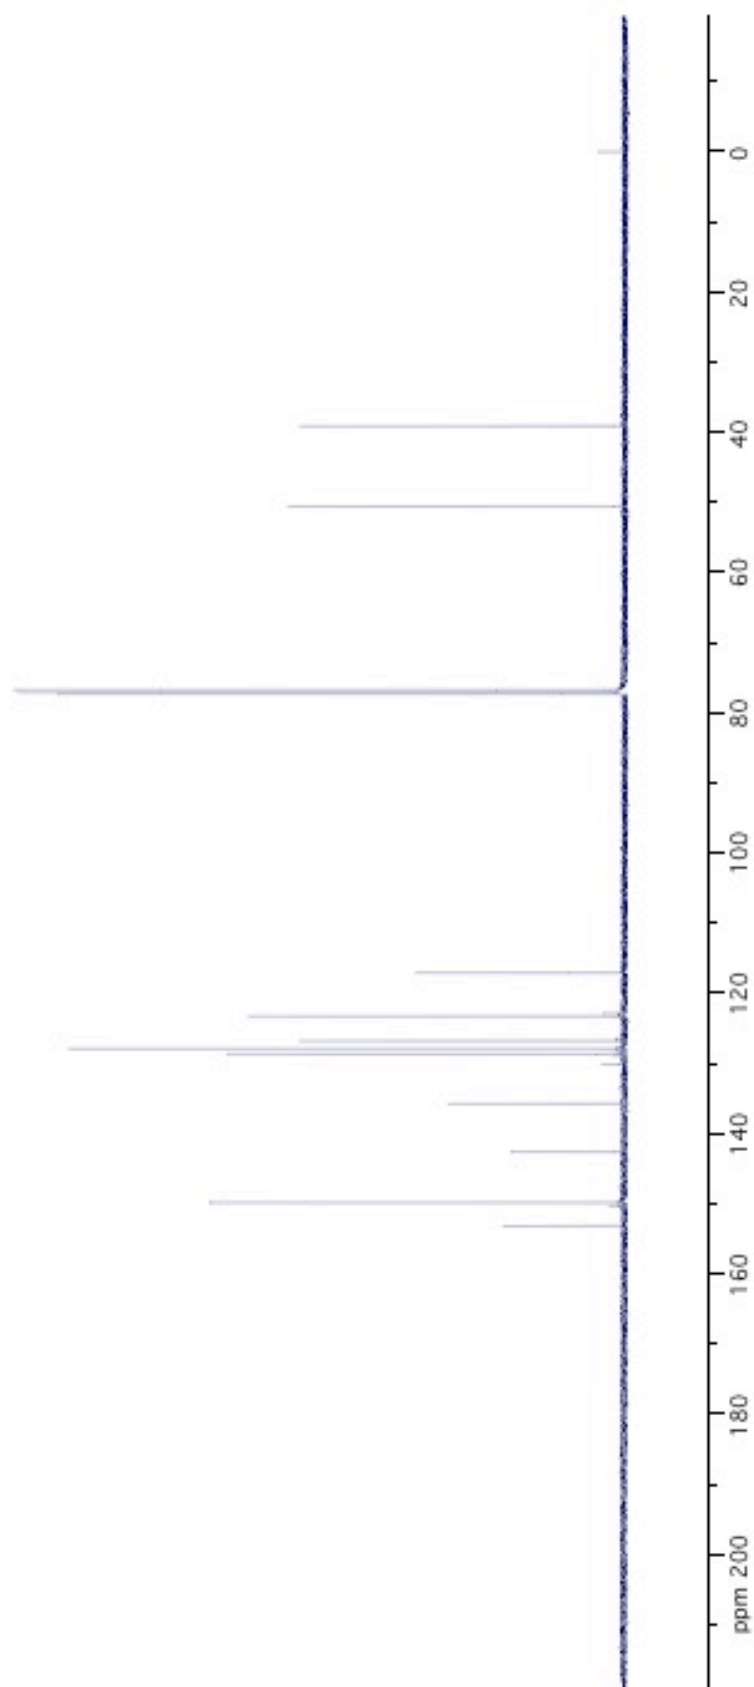

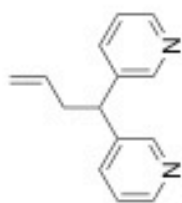

**5da**

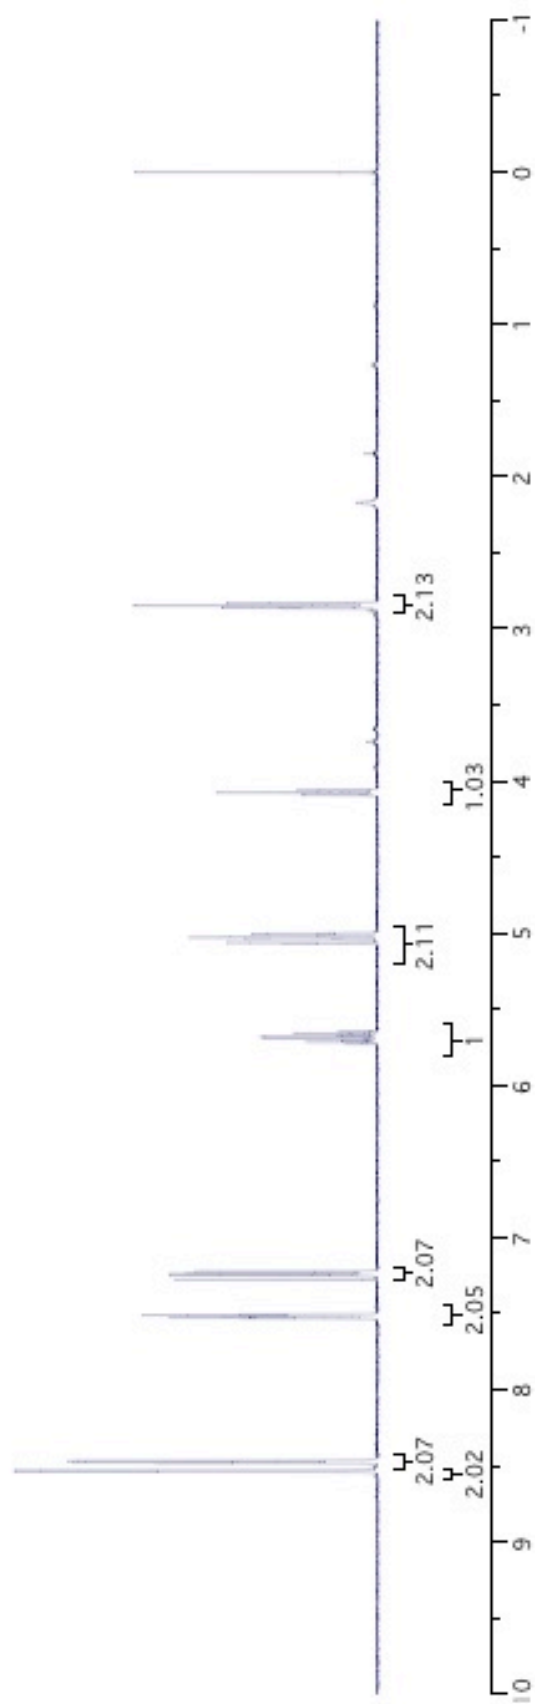

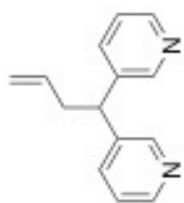

**5da**

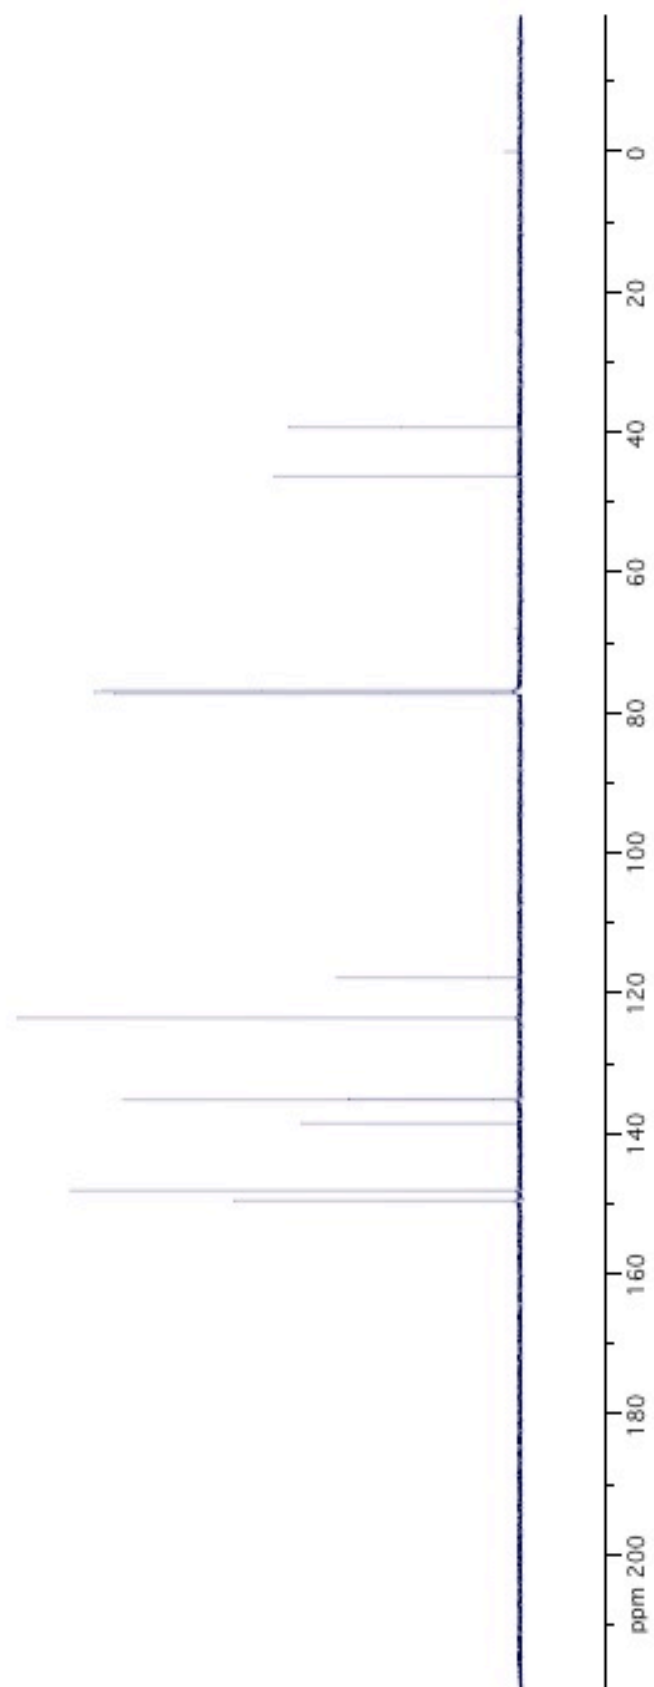

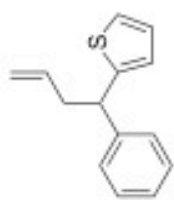

**5a**

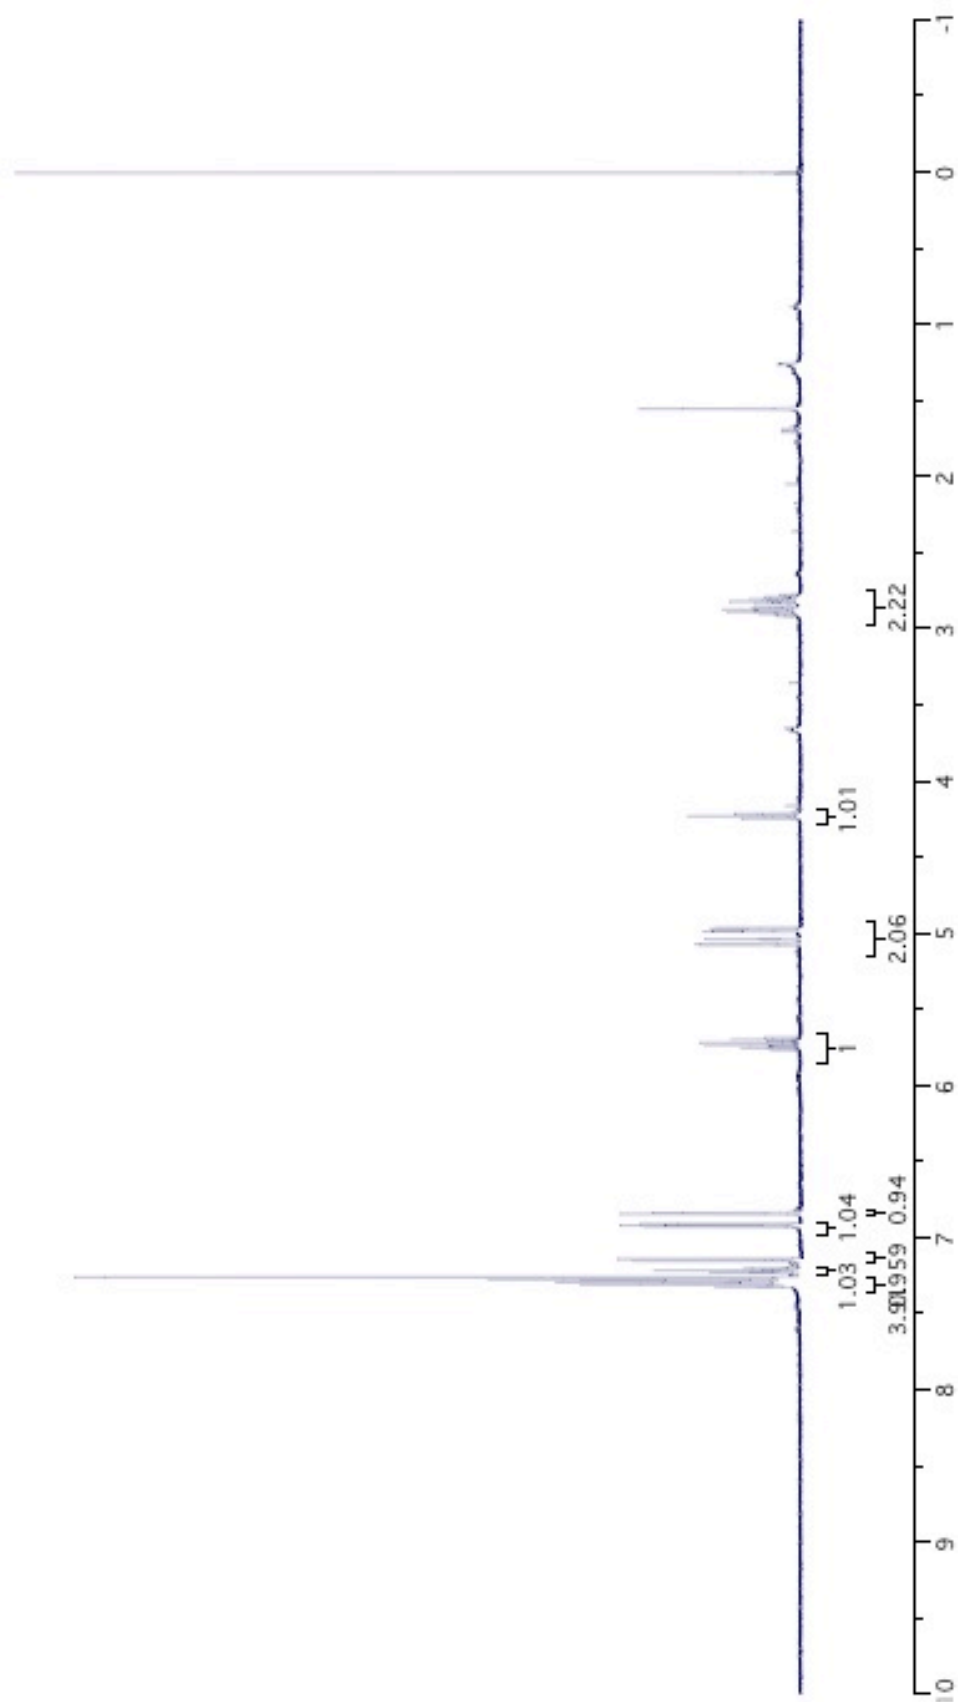

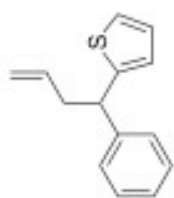

**5ea**

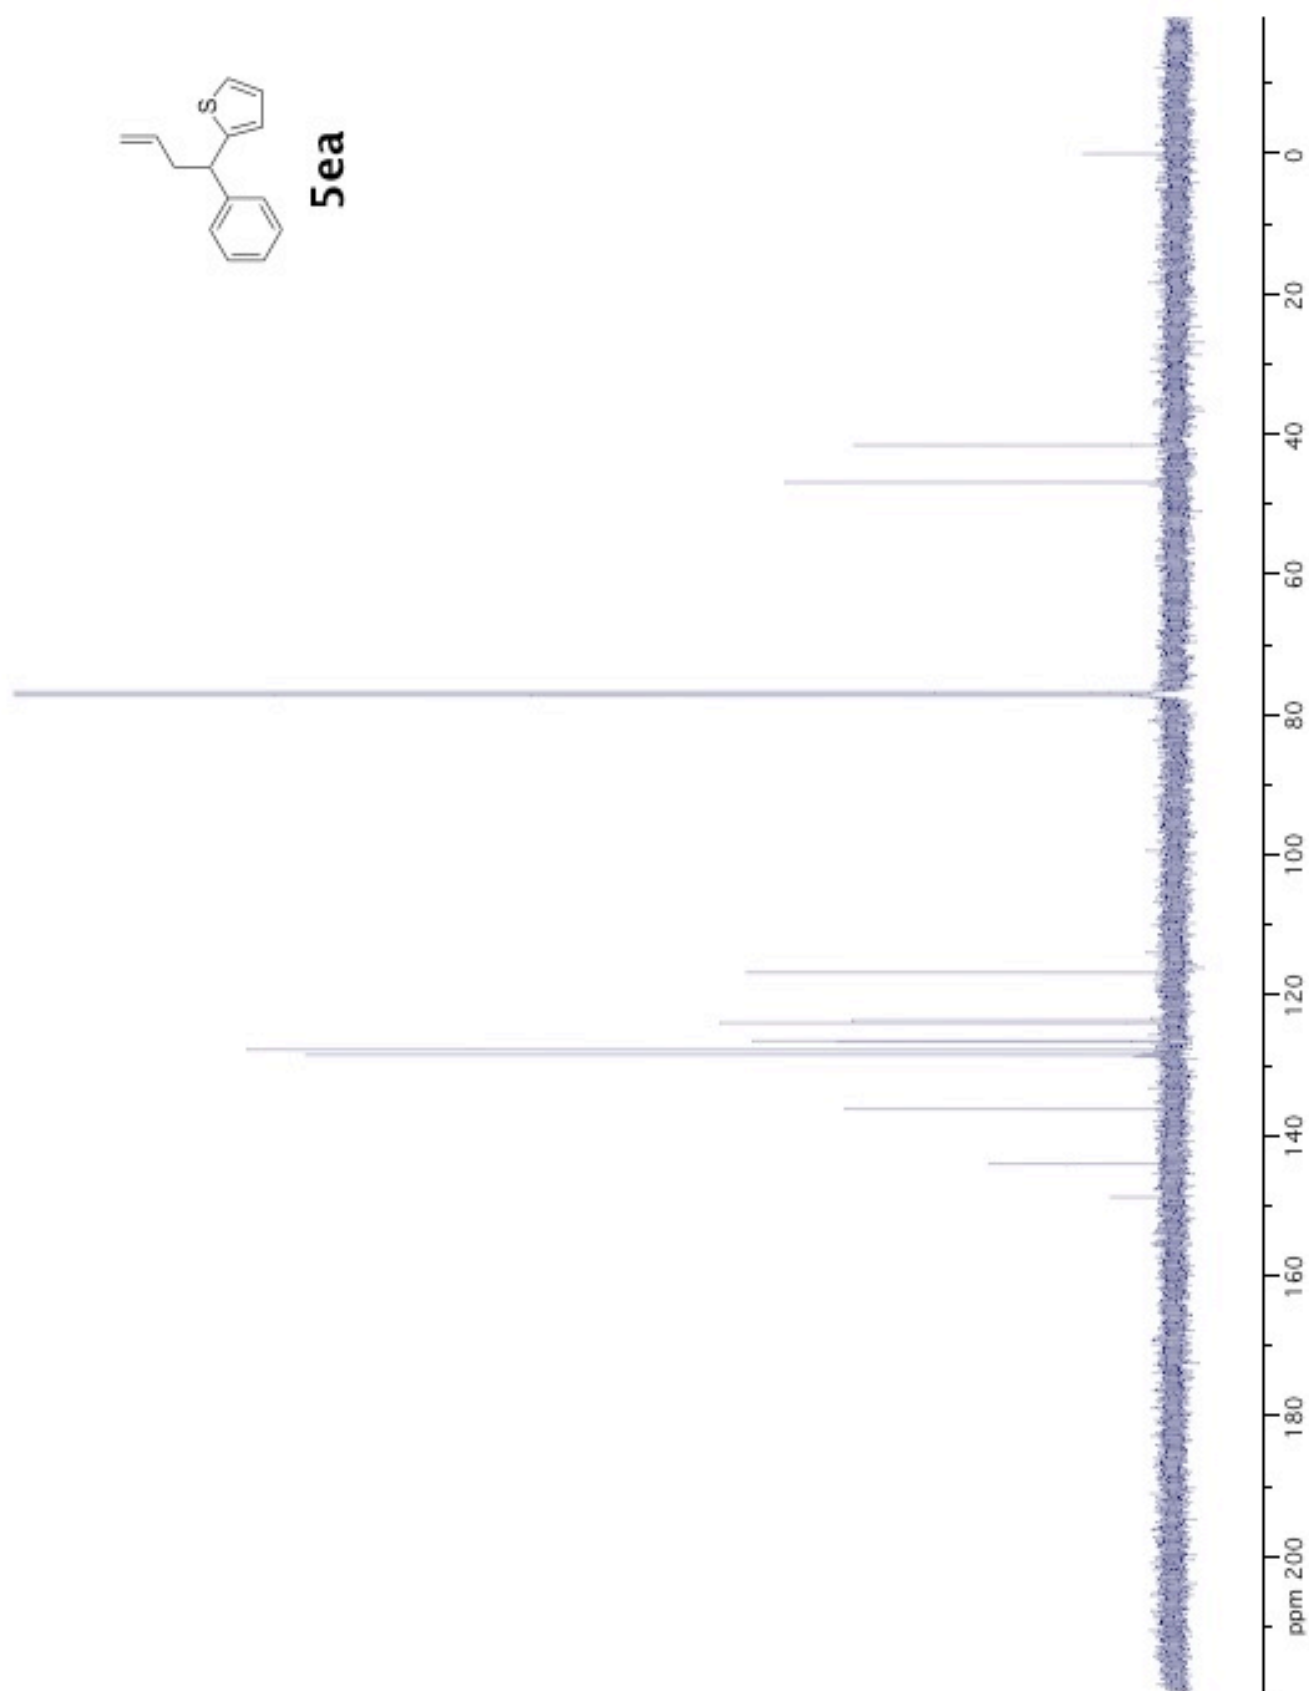

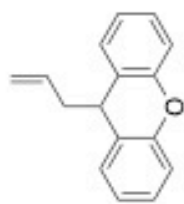

**5fa**

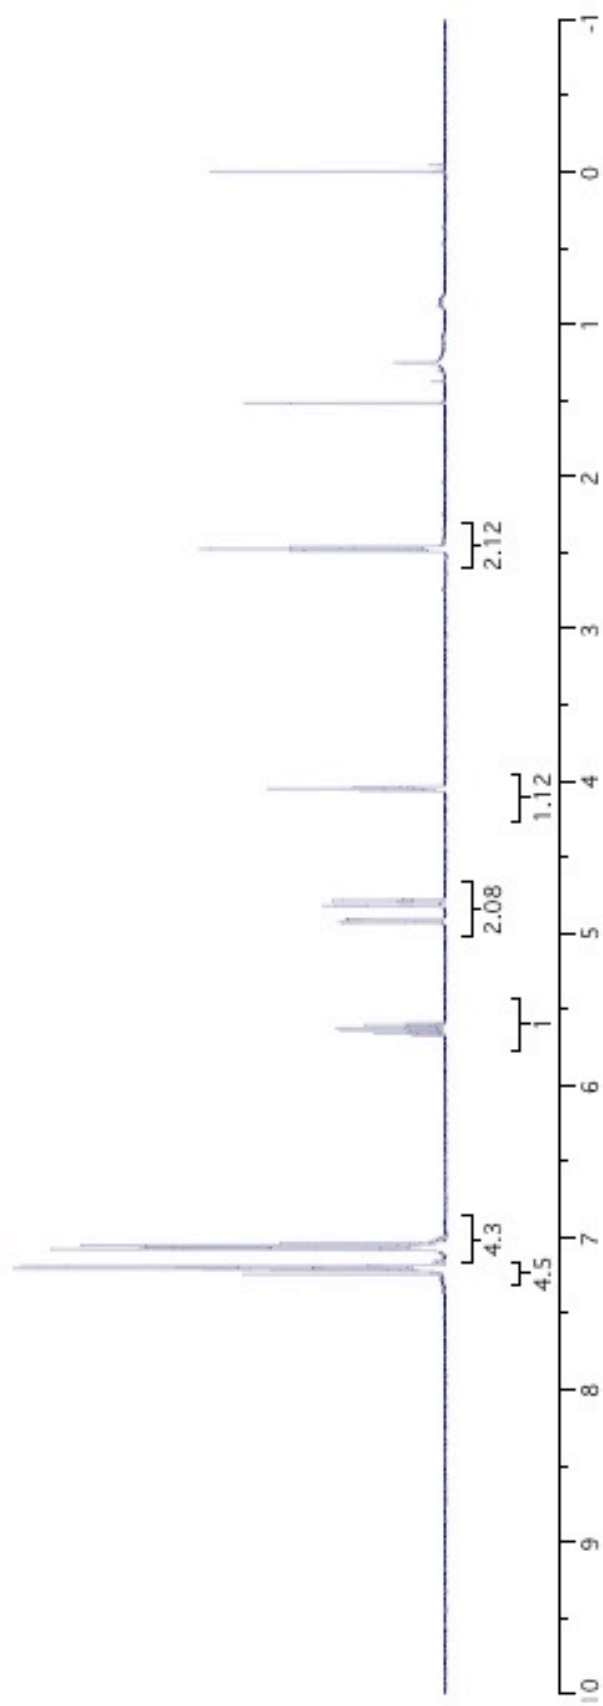

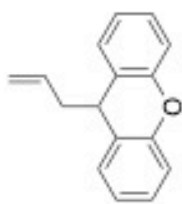

**5fa**

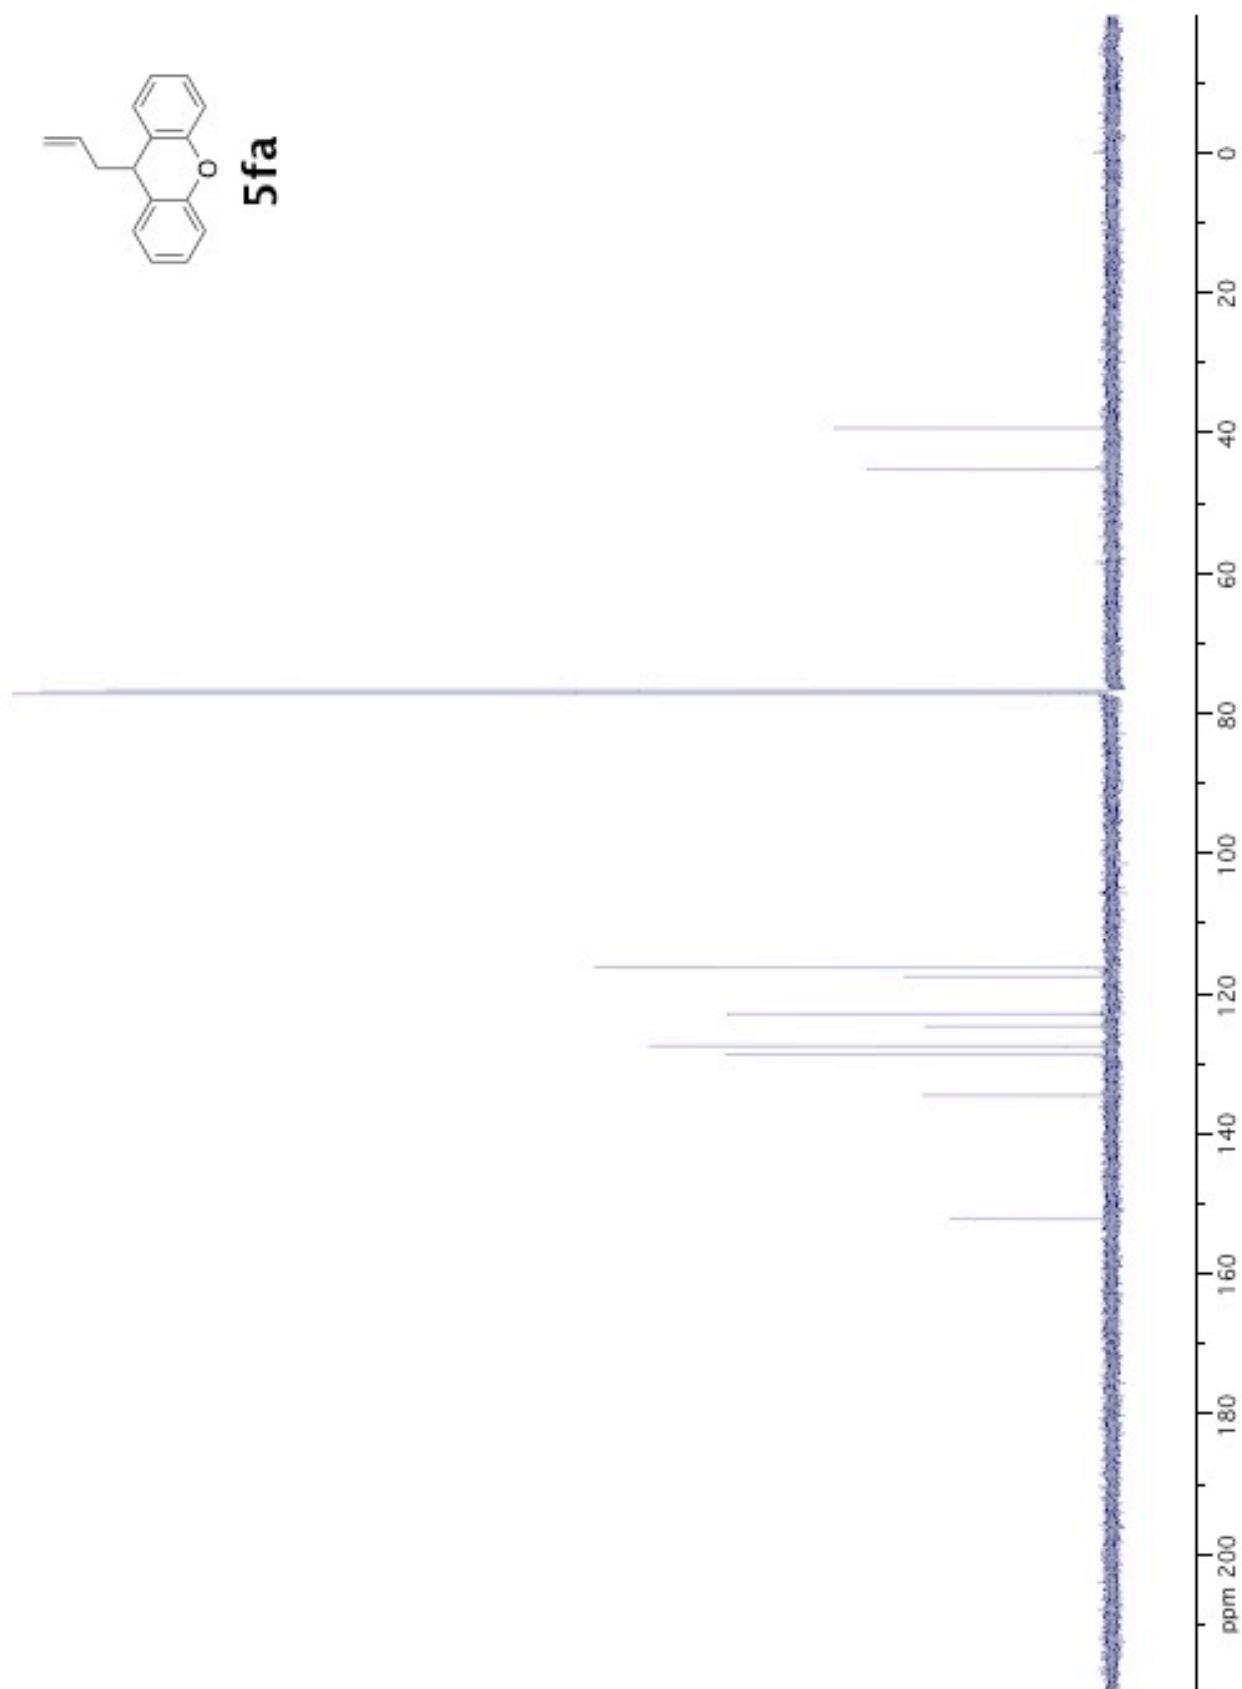

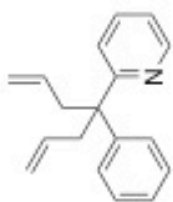

**6aa**

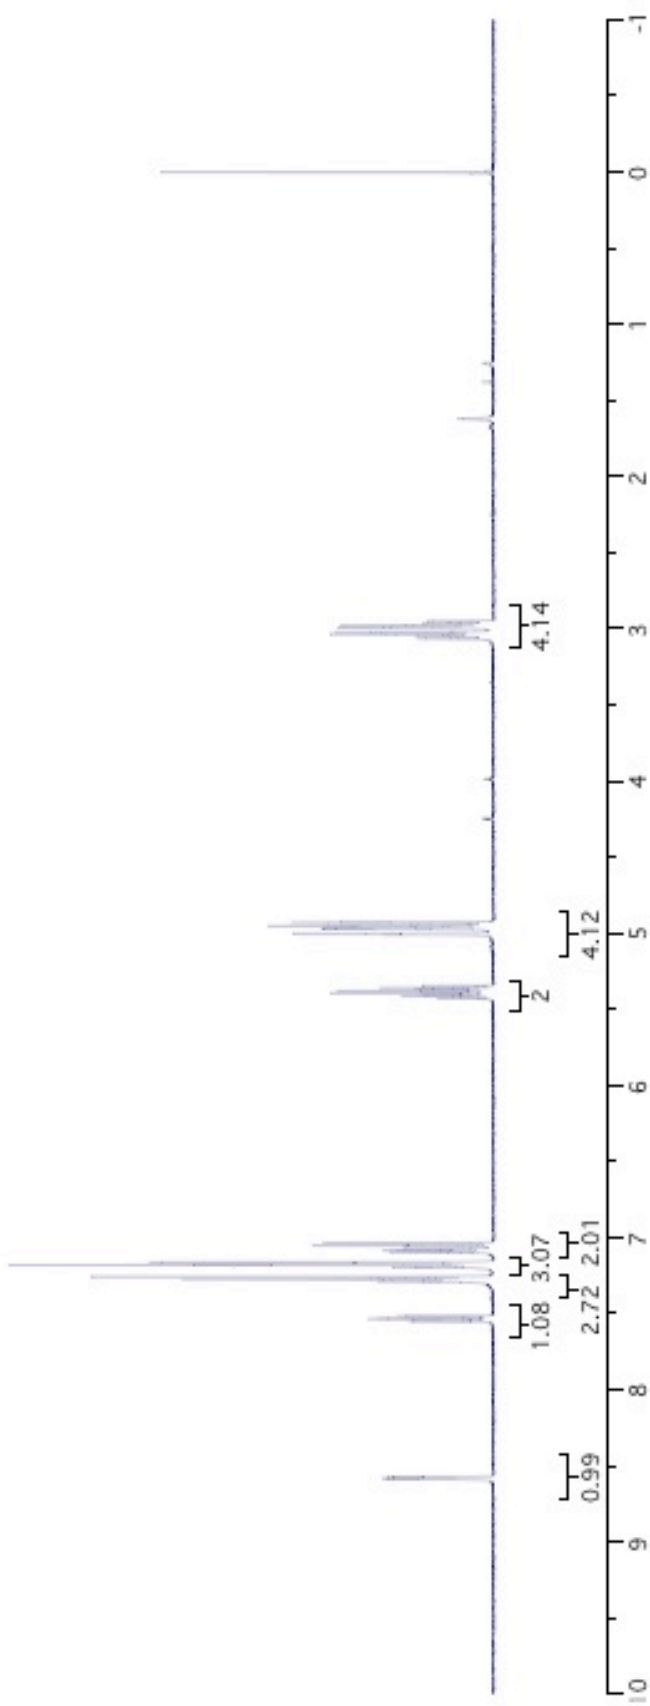



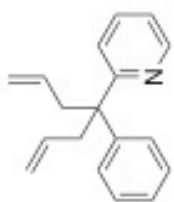

**6aa**

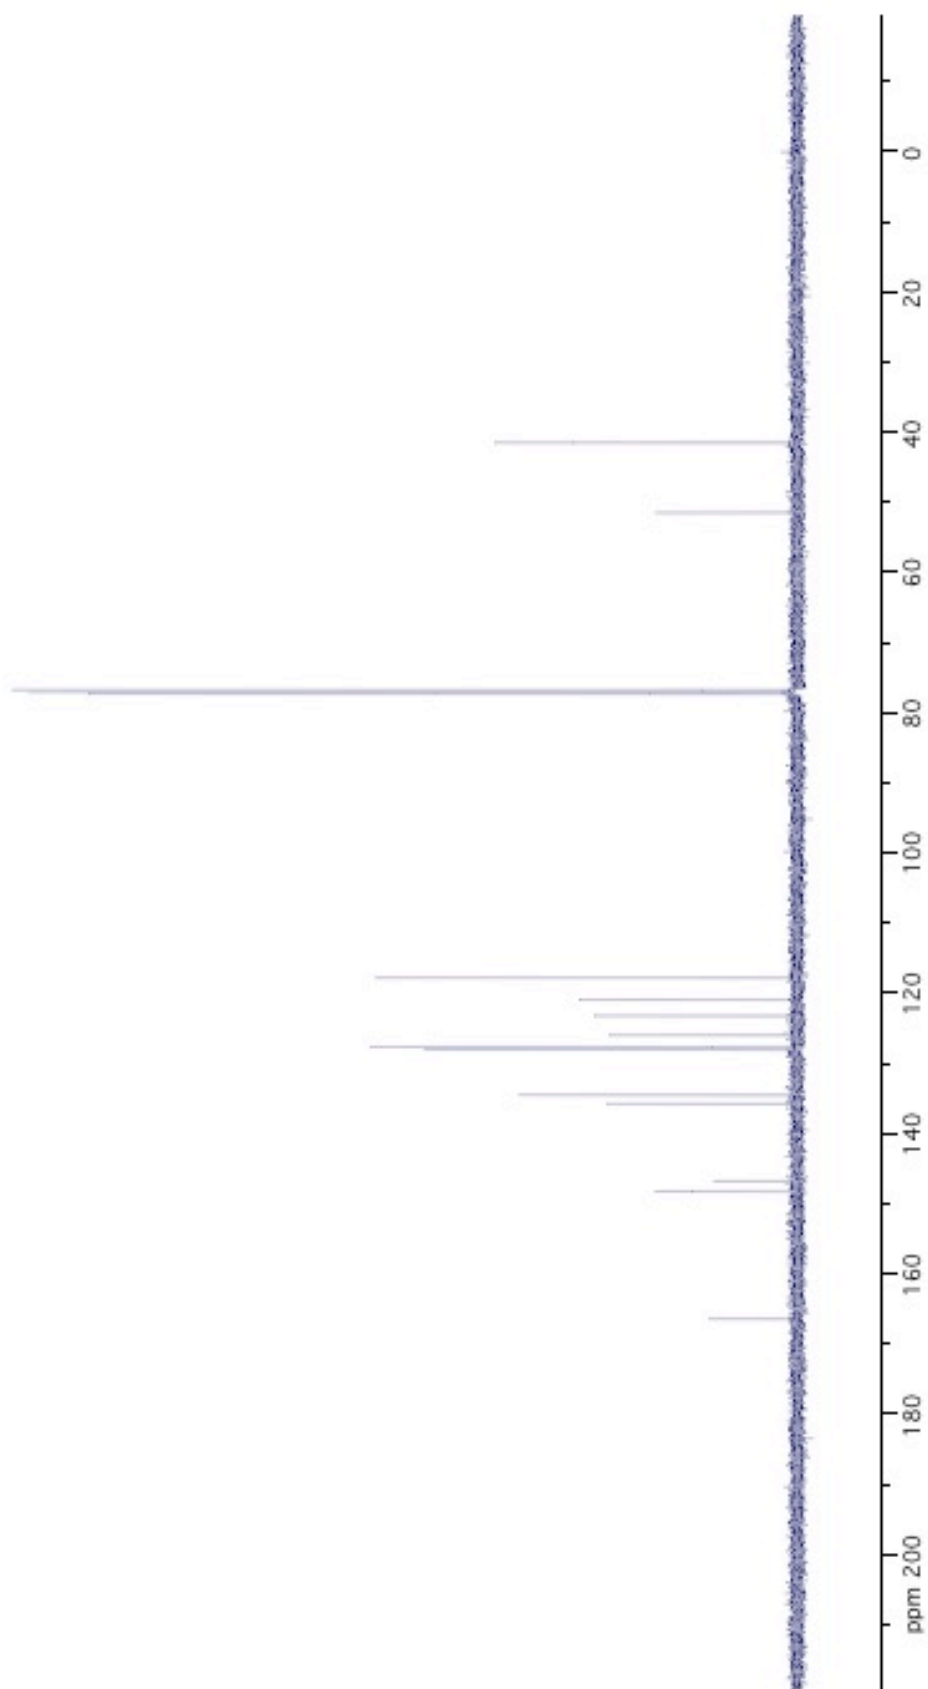

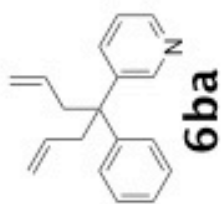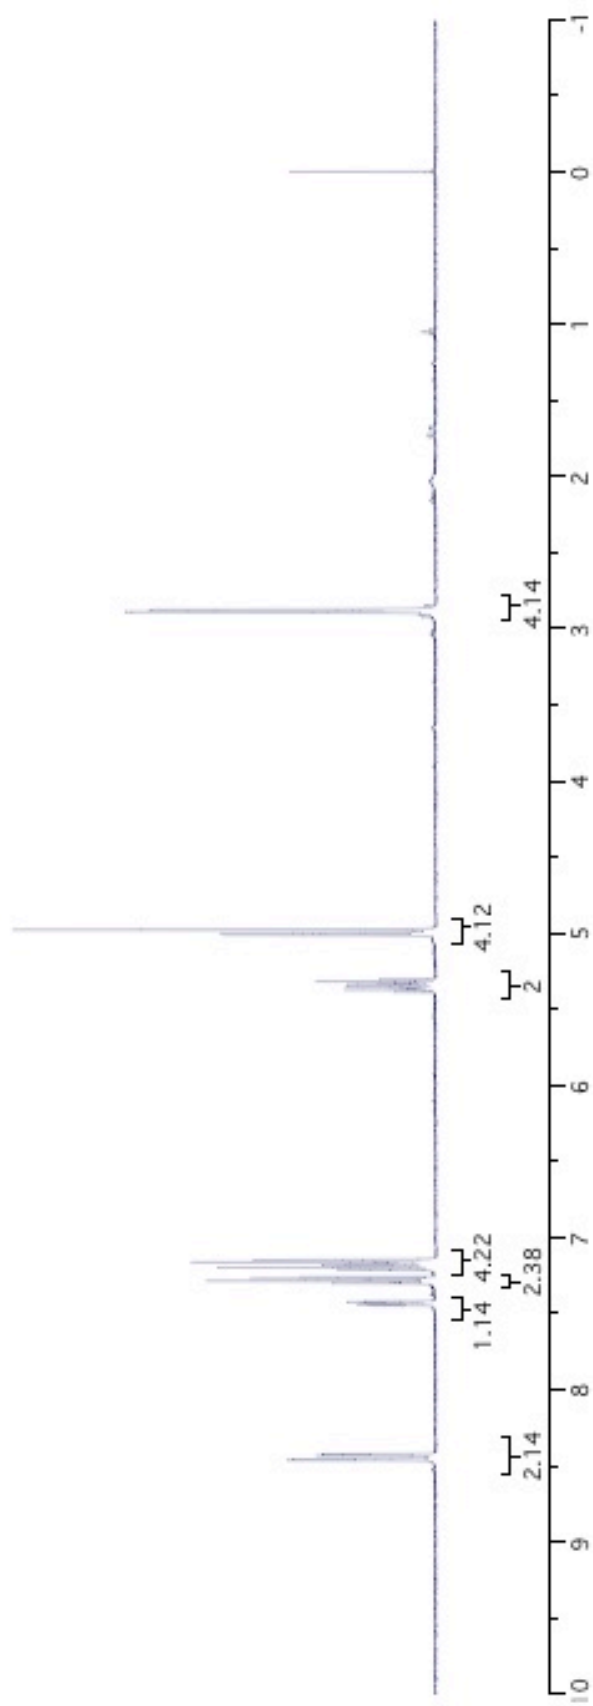

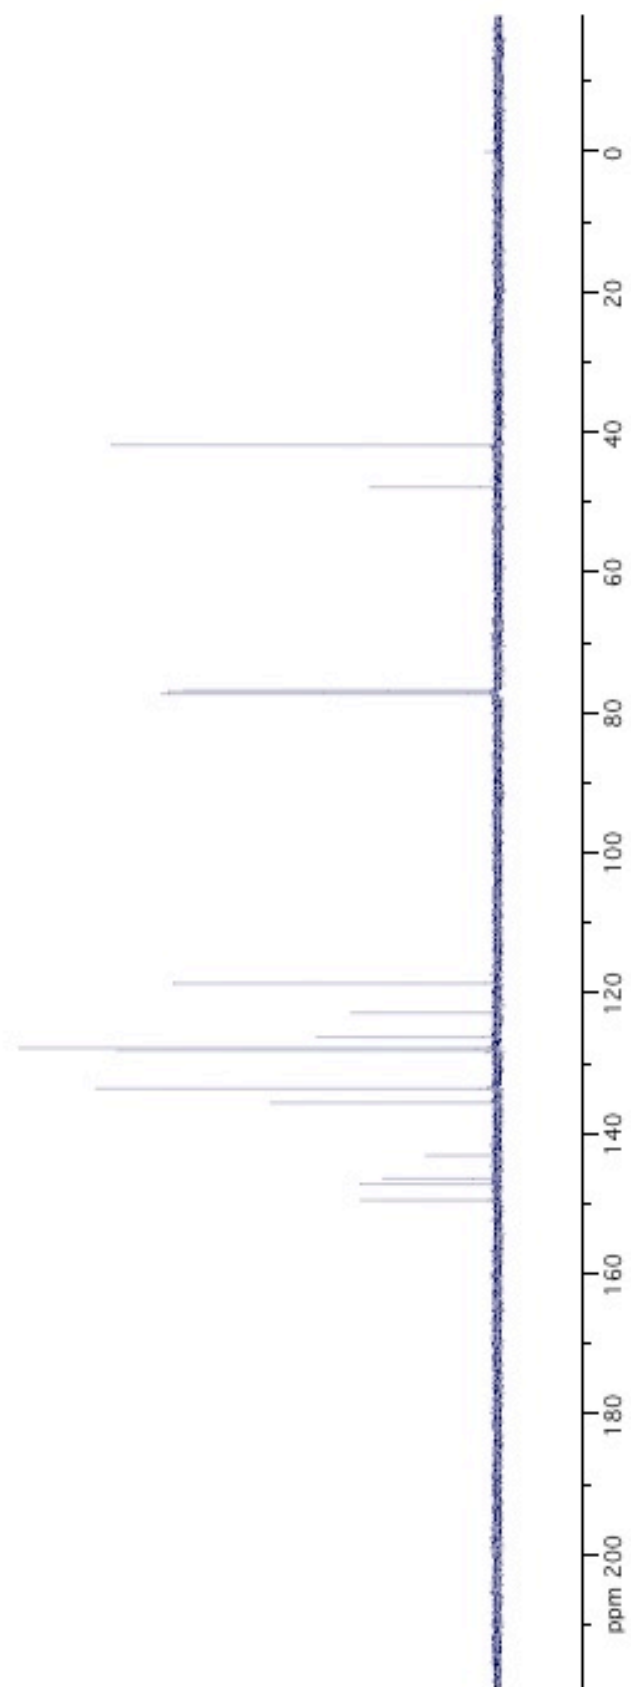

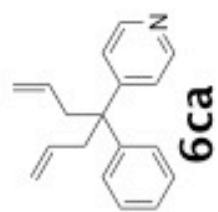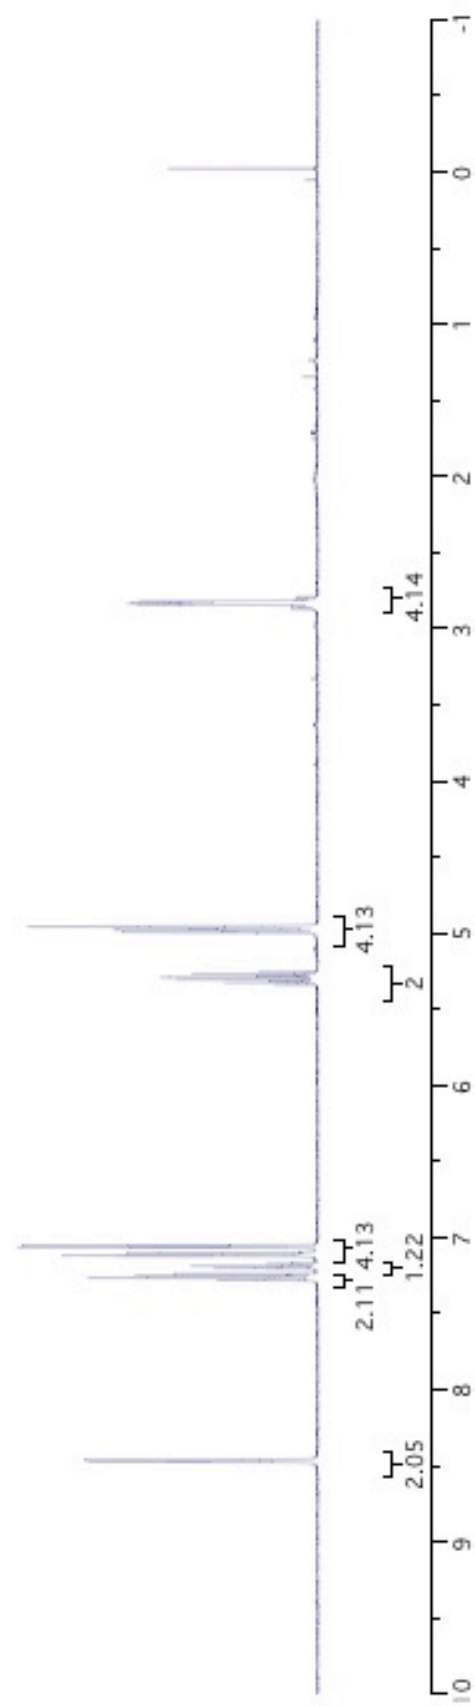

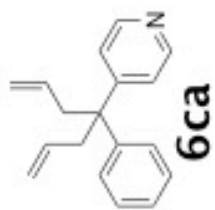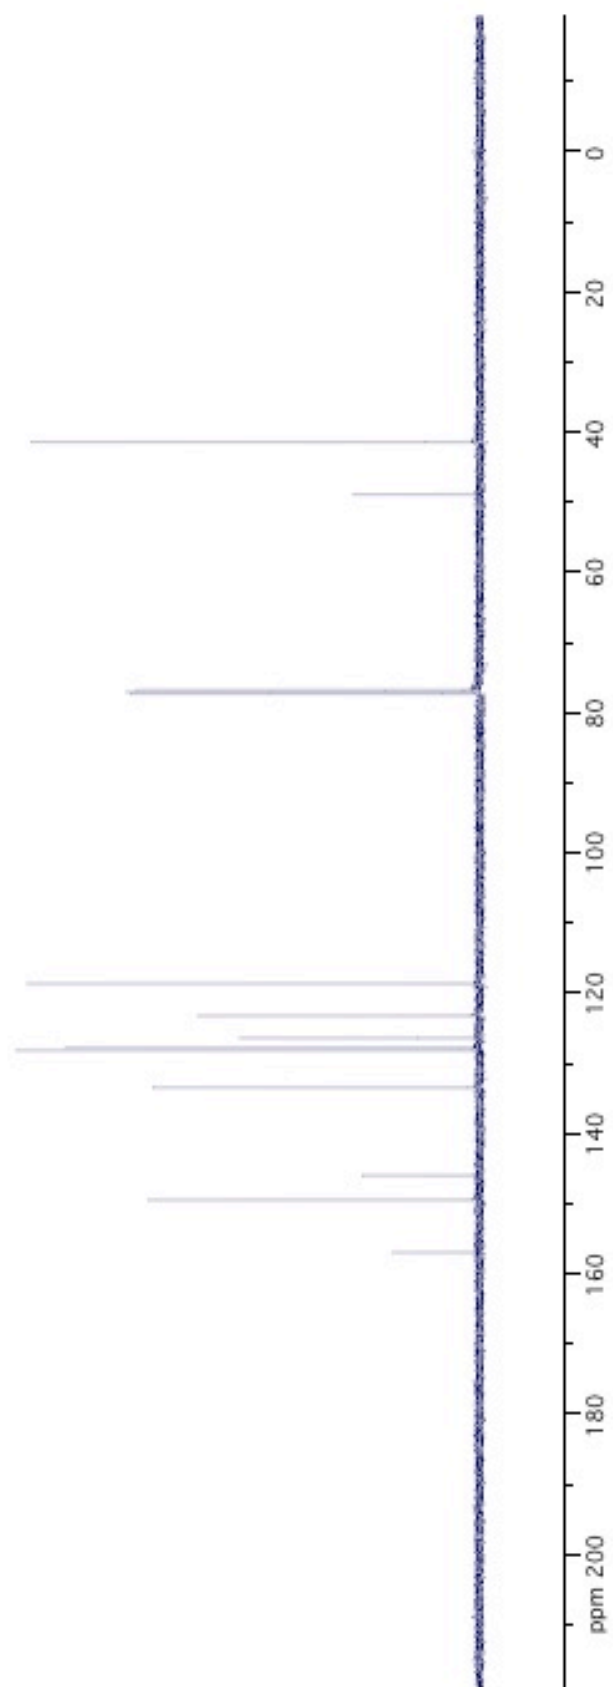

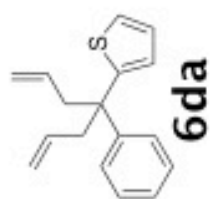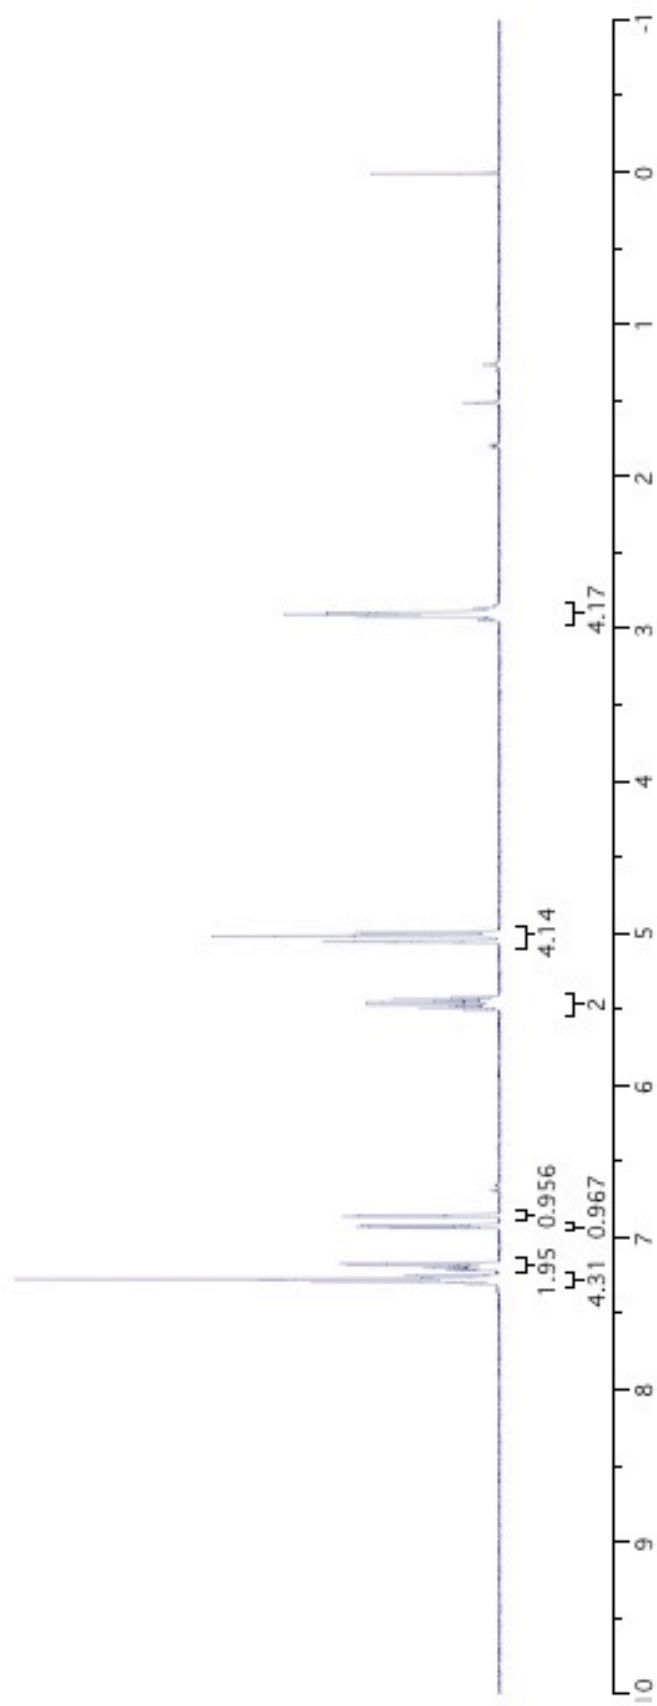

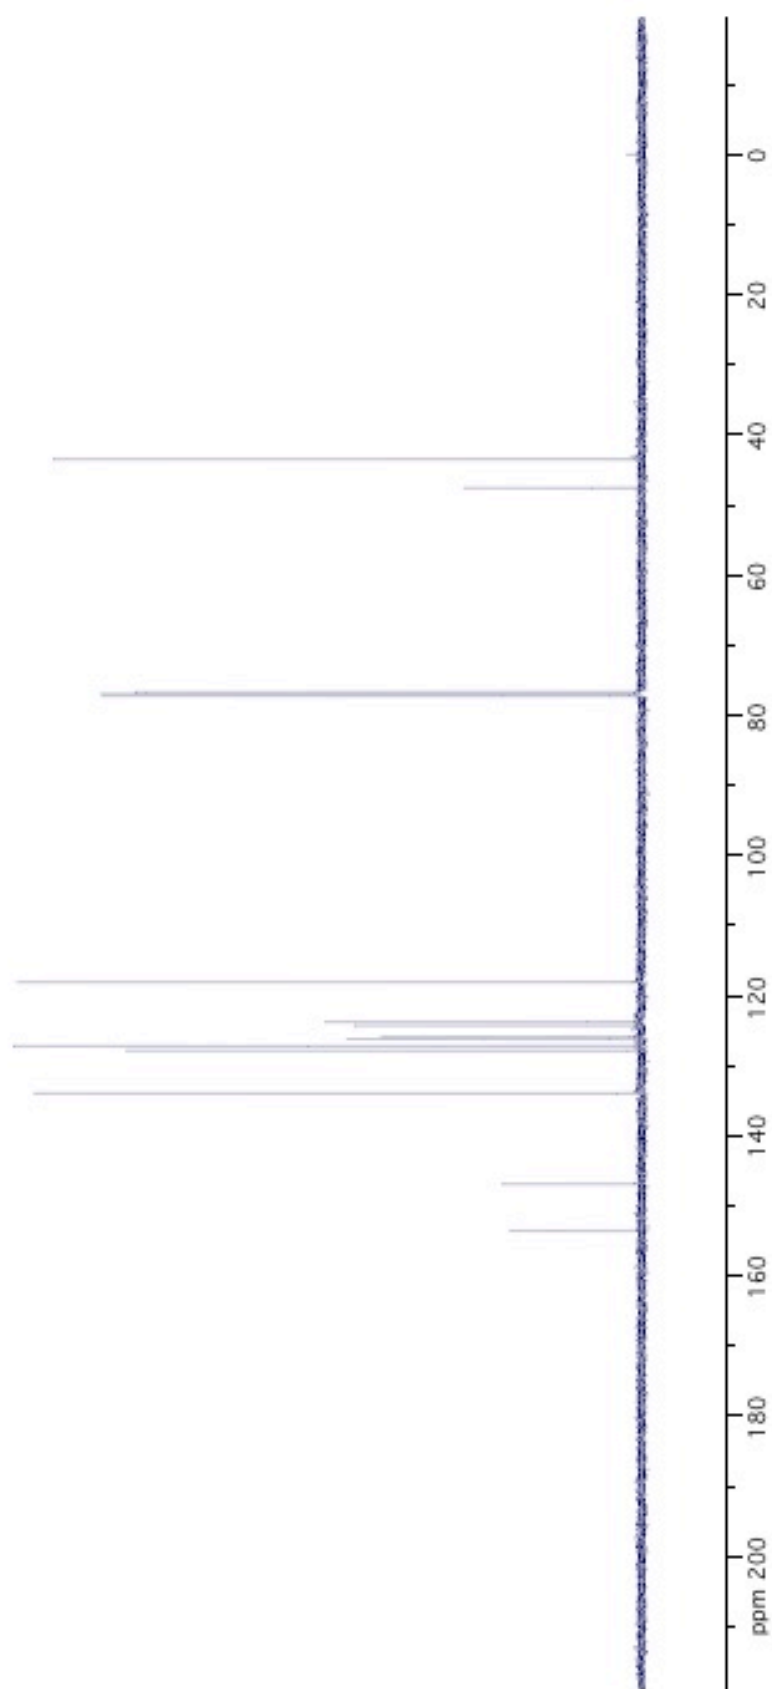

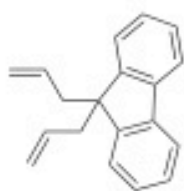

**6ea**

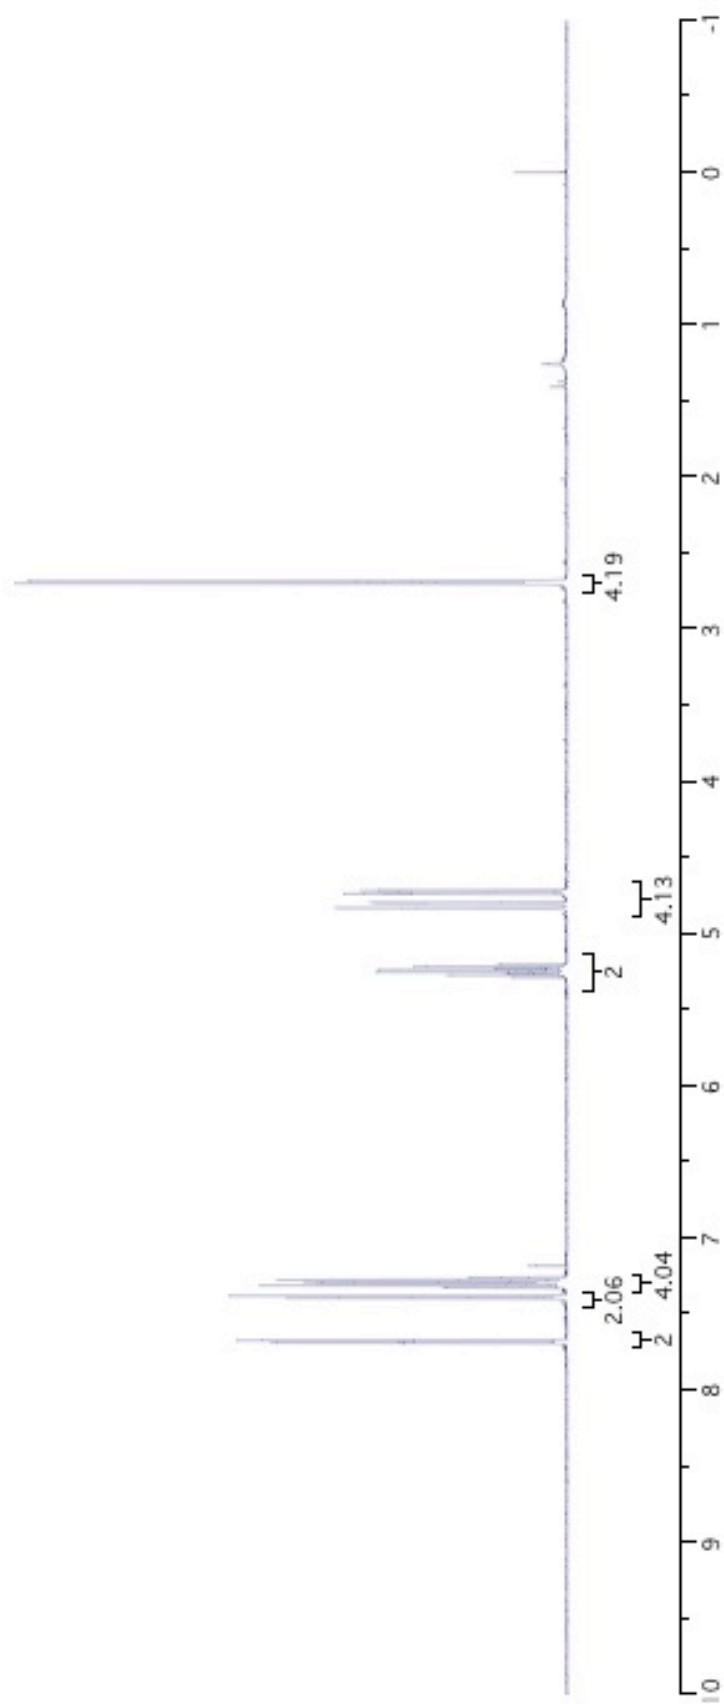



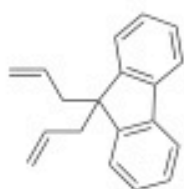

**6ea**

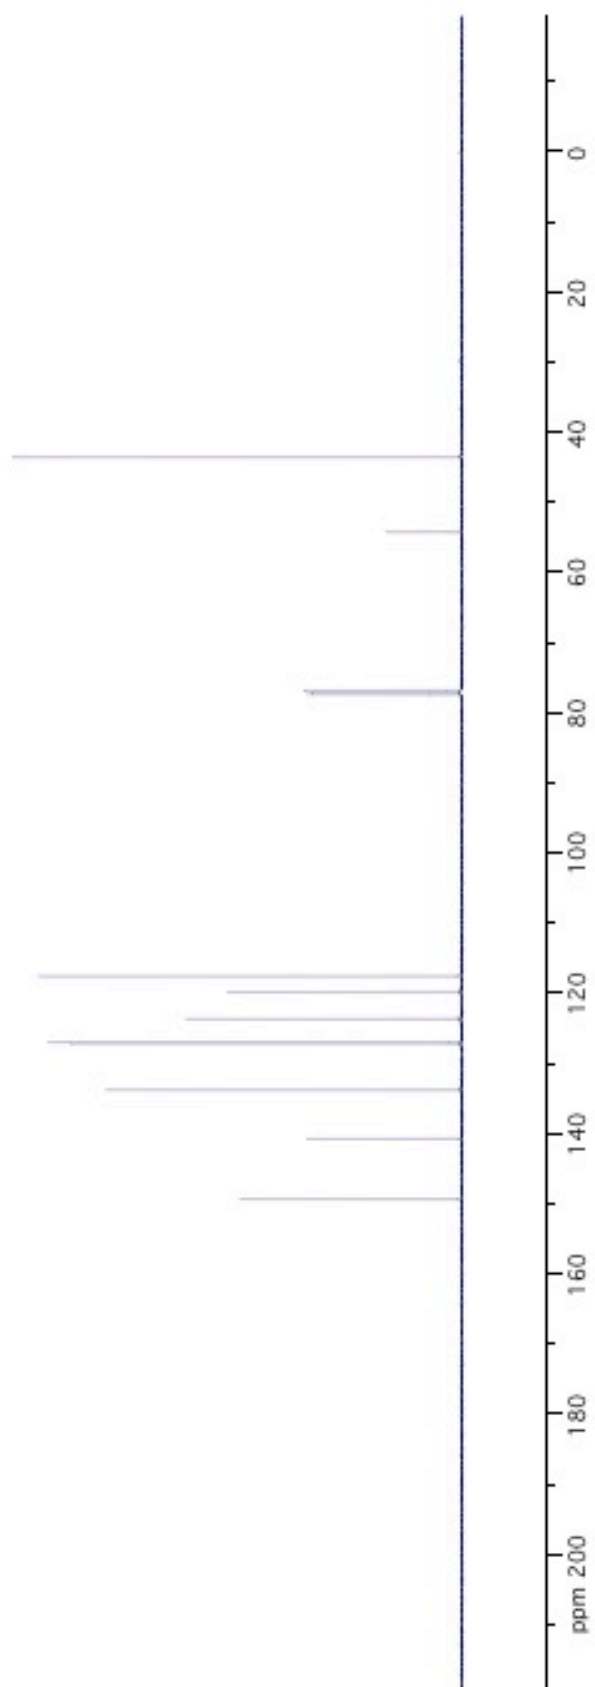

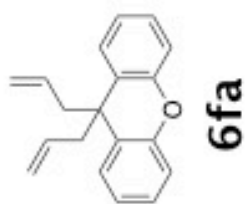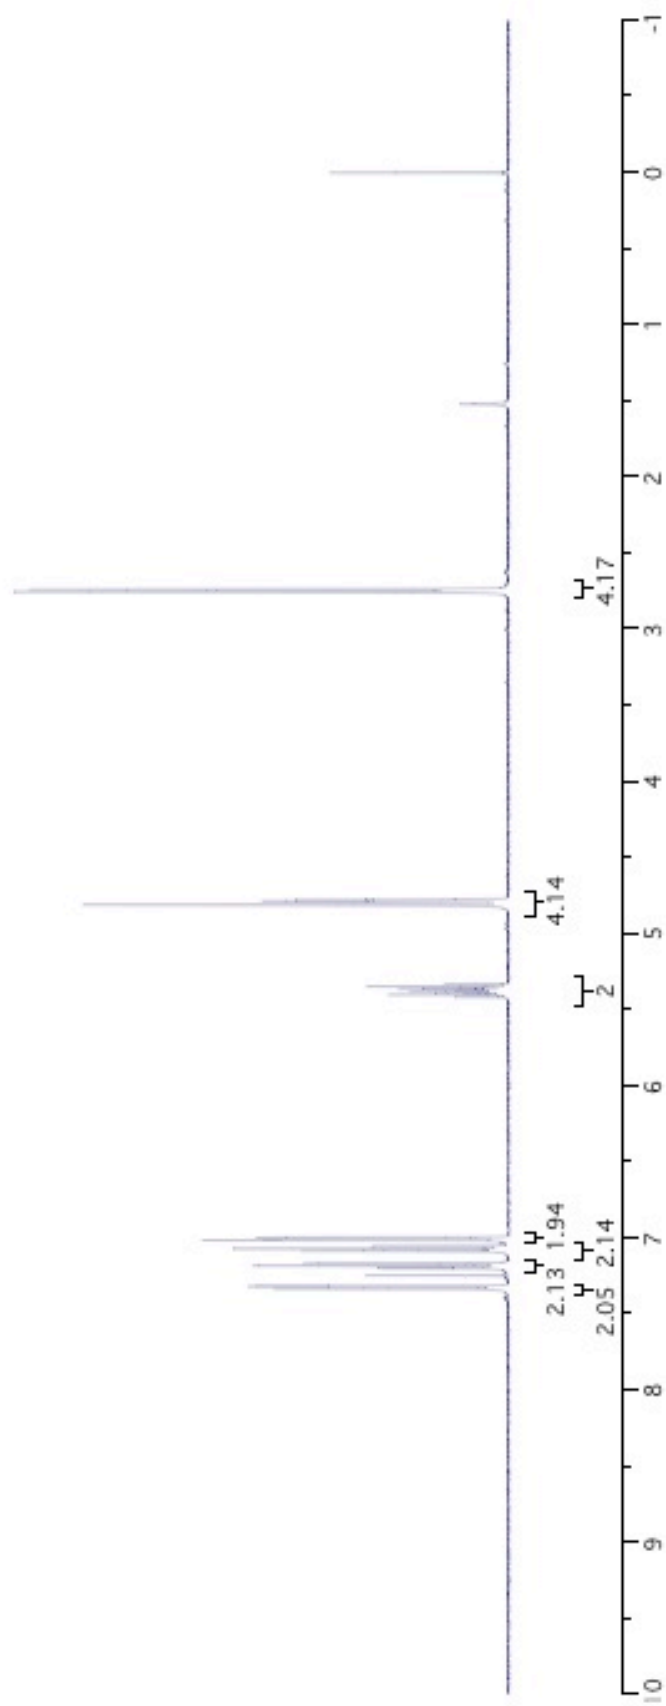

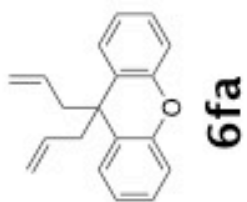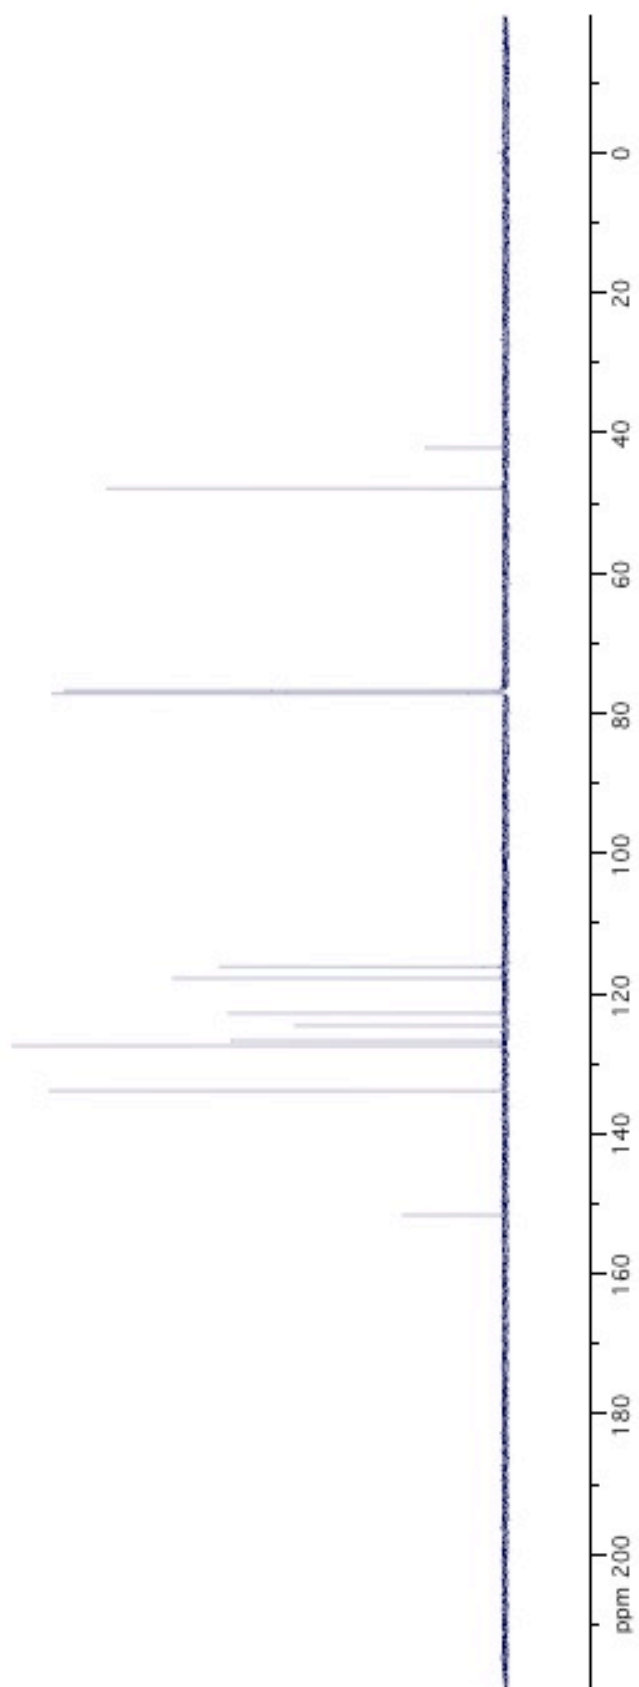

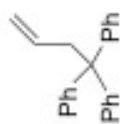

**8aa**

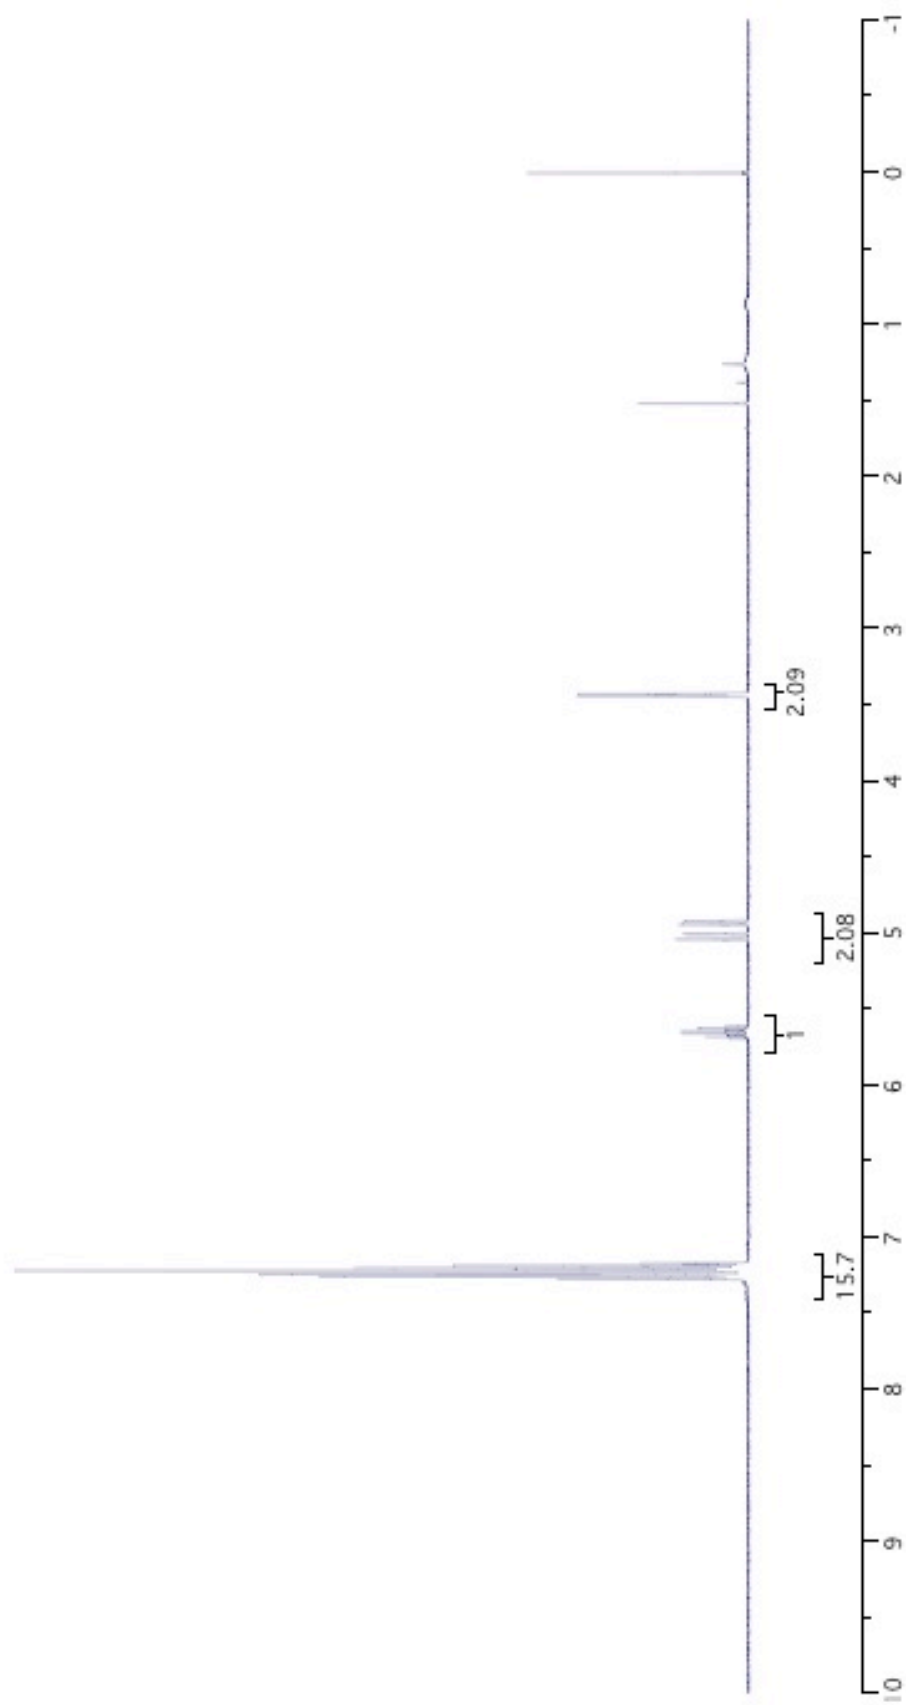

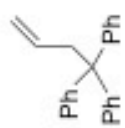

**8aa**

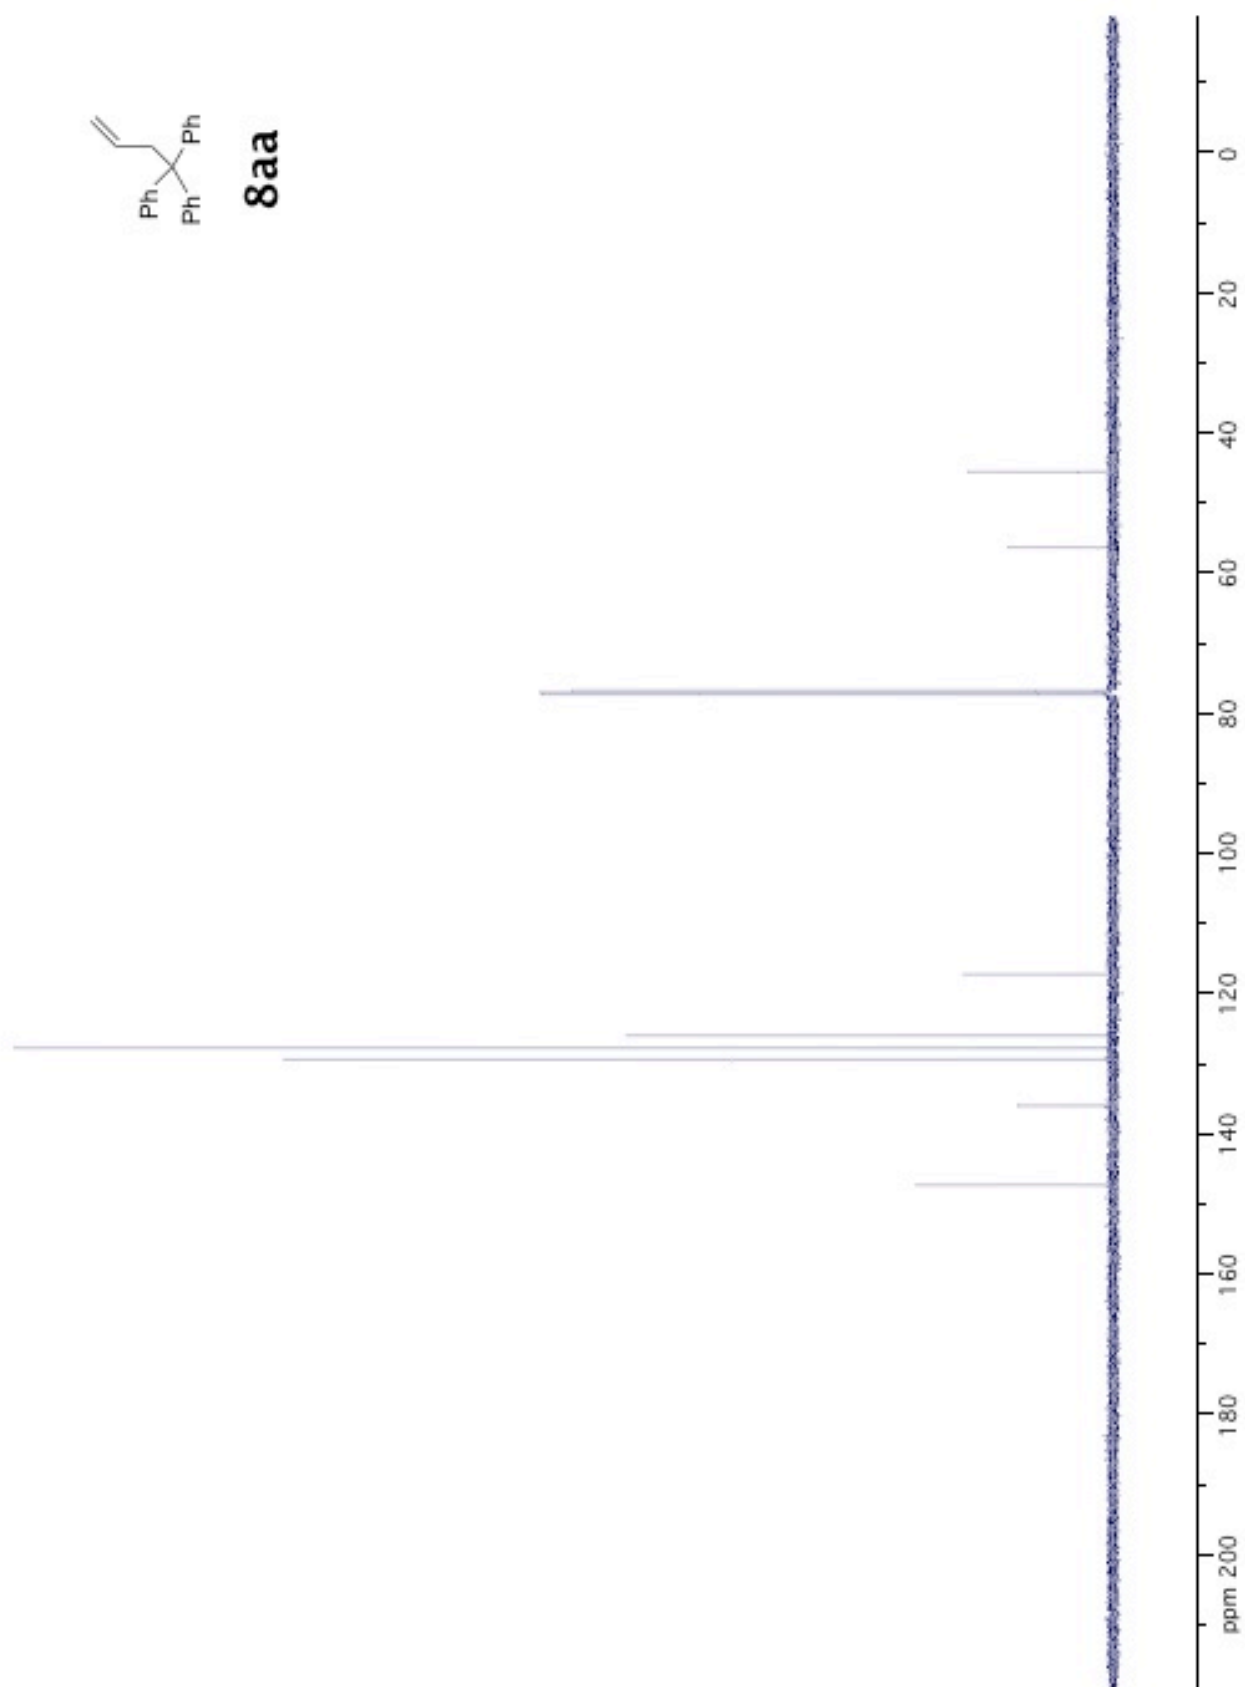

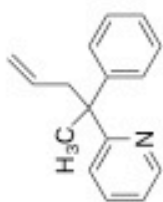

**8ba**

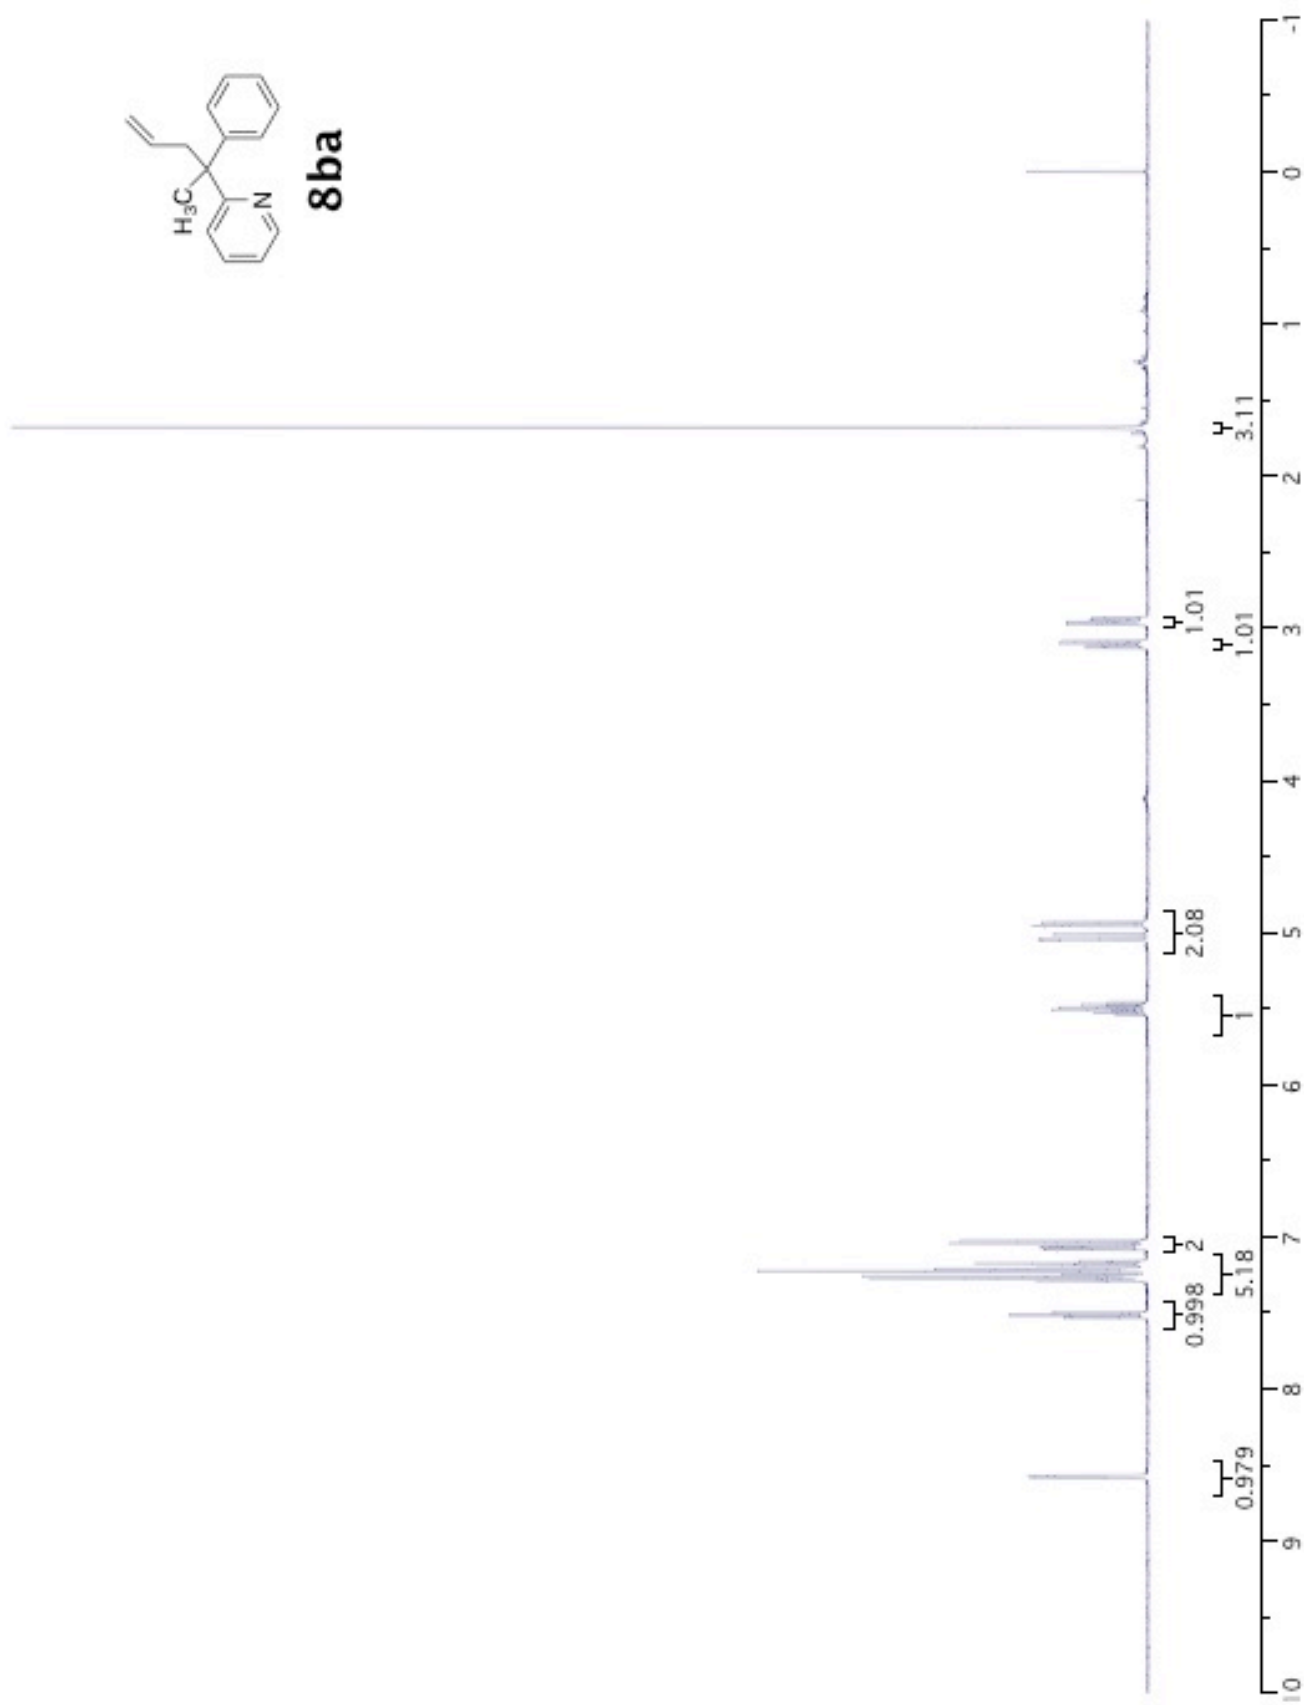

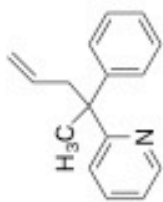

**8ba**

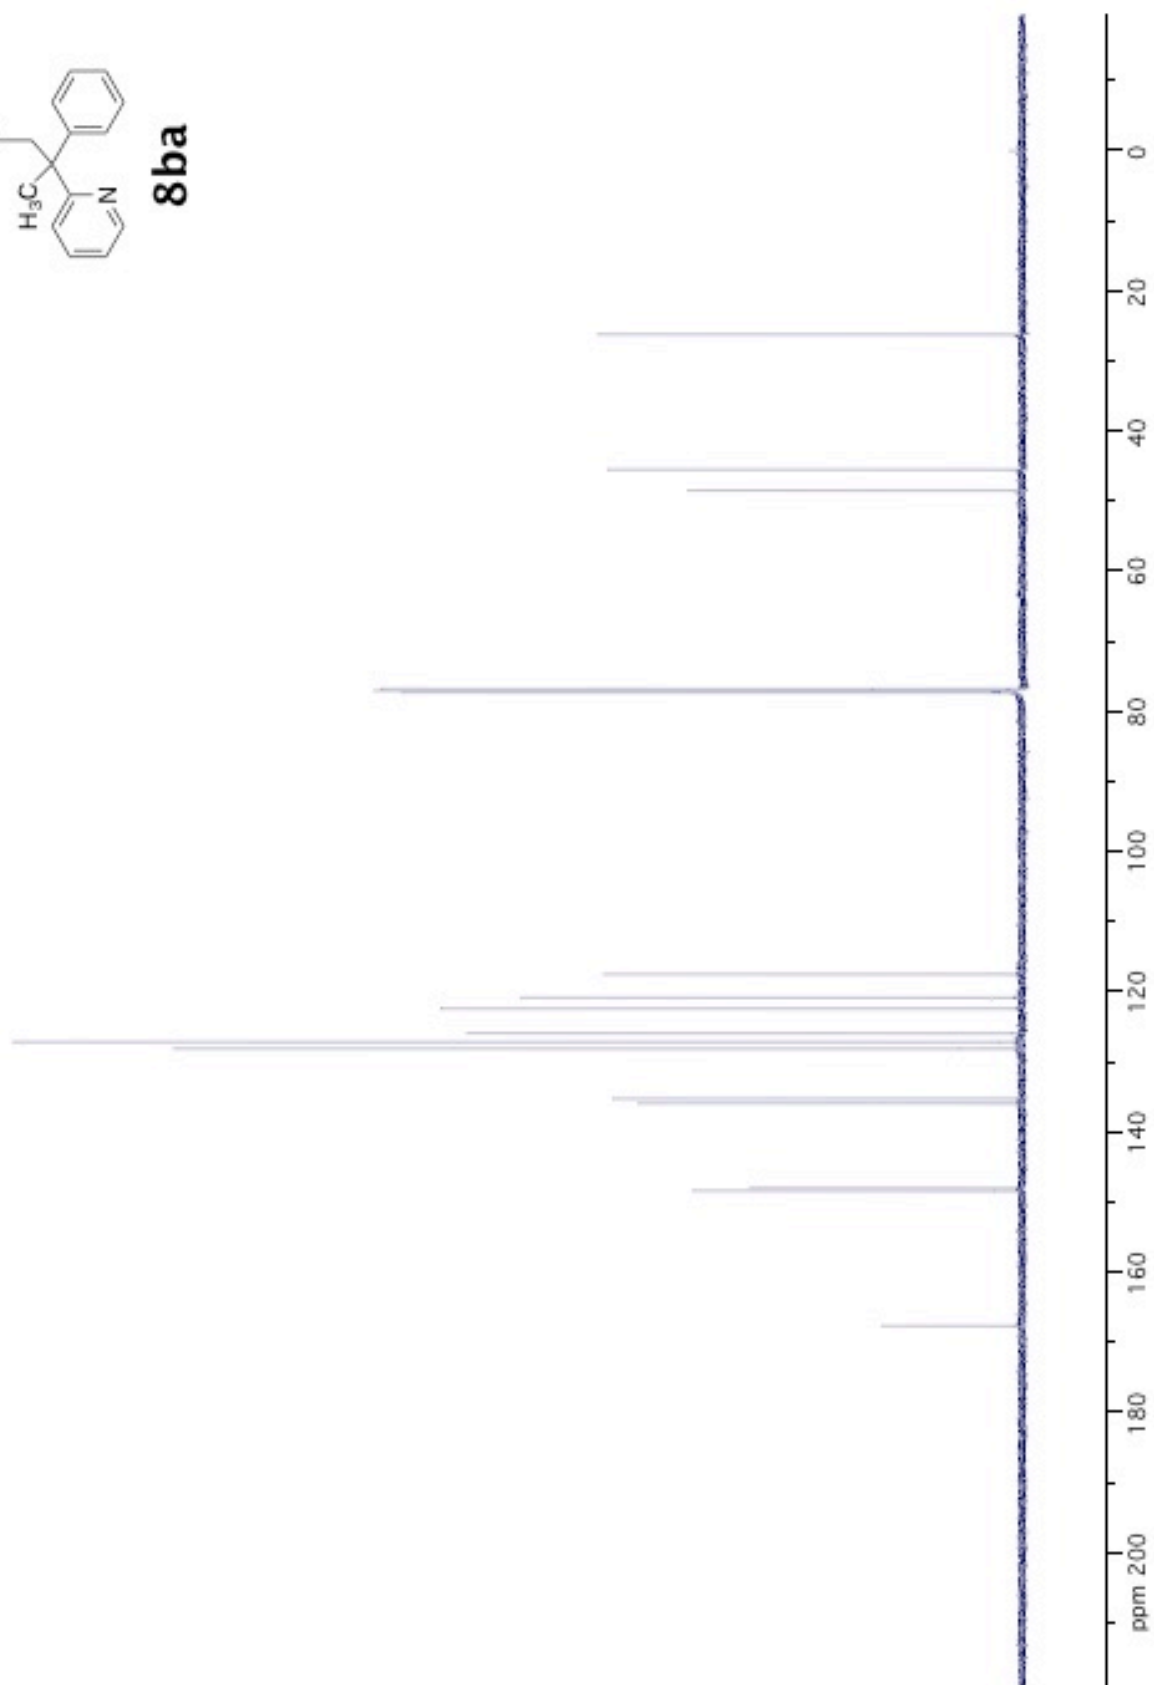

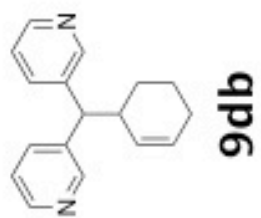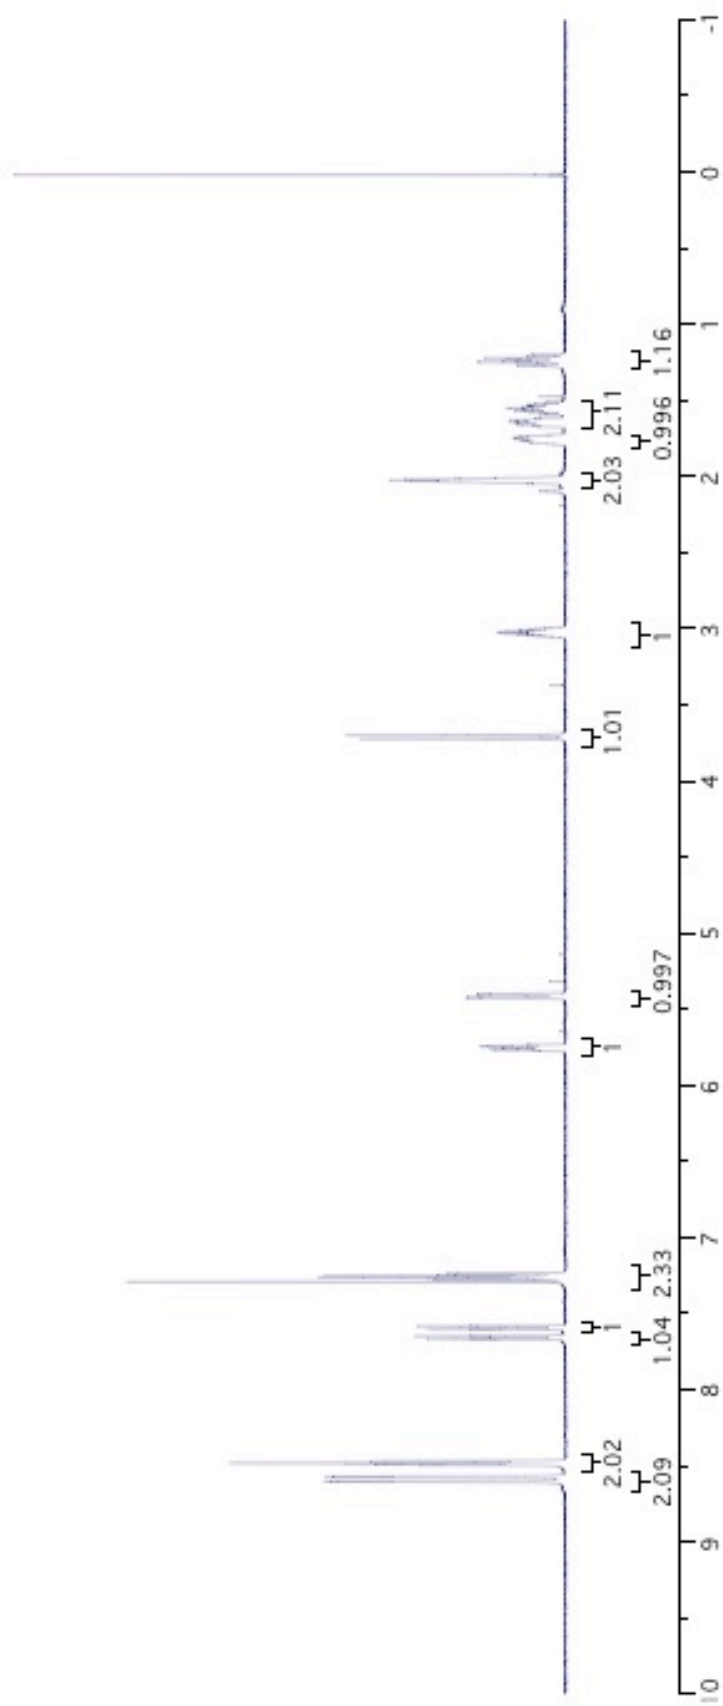



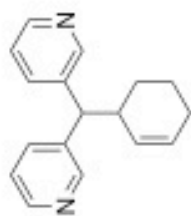

**9db**

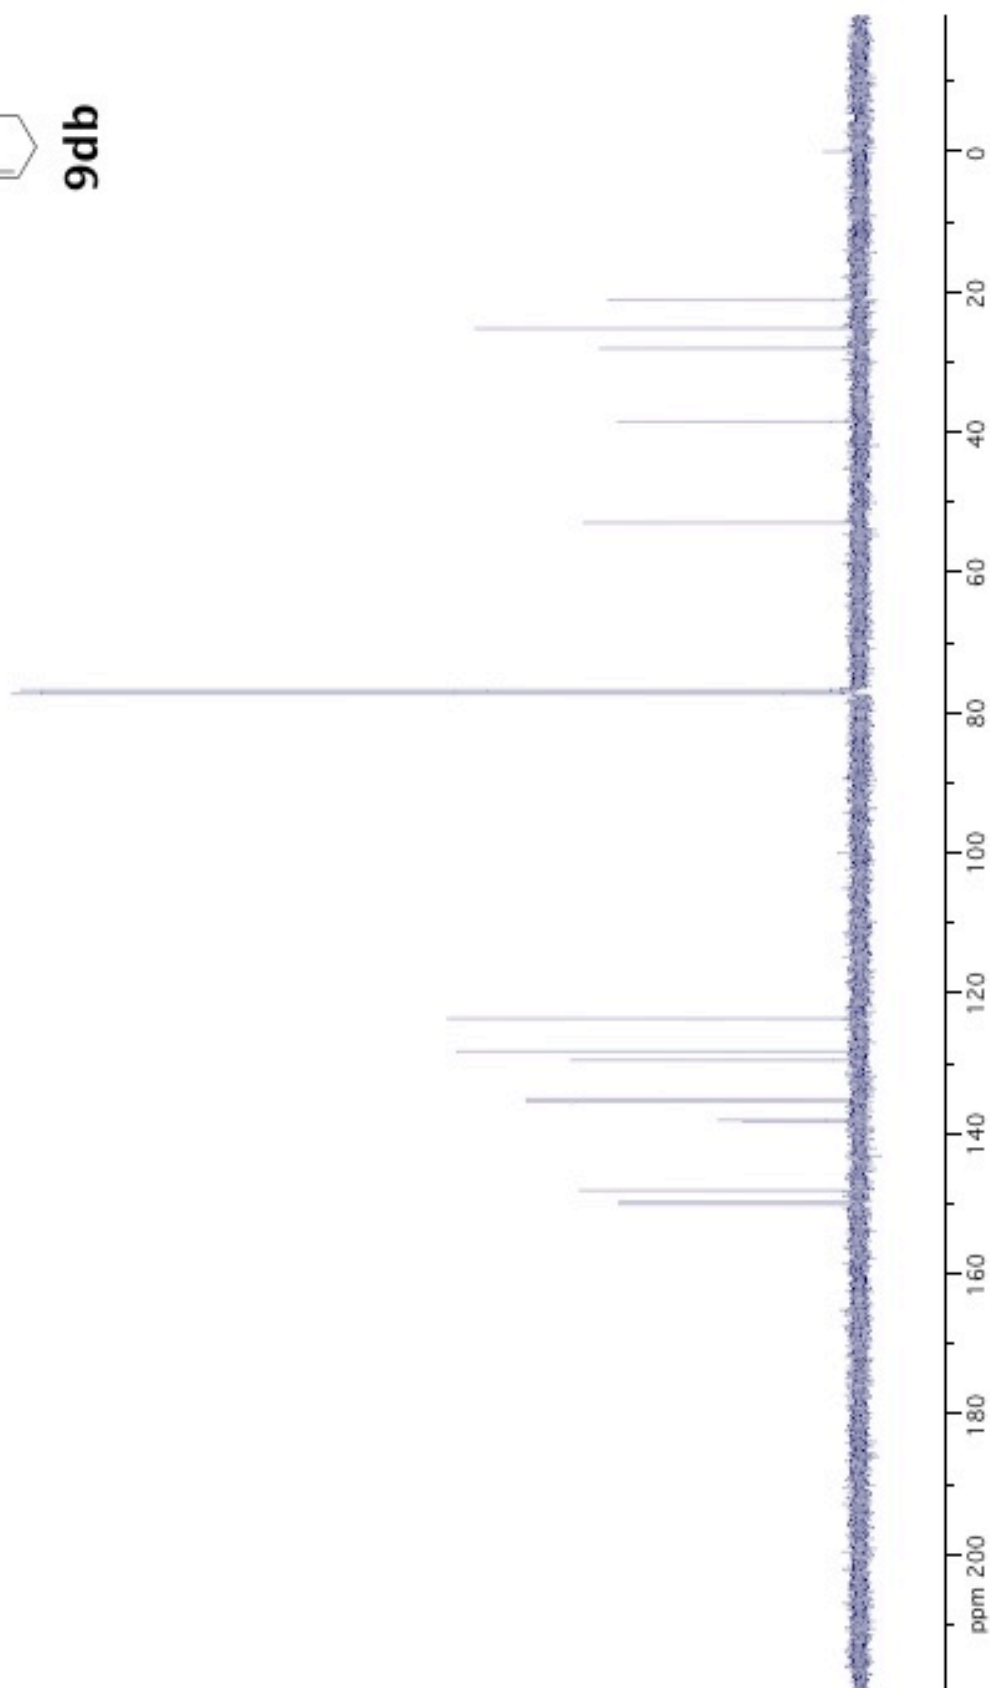

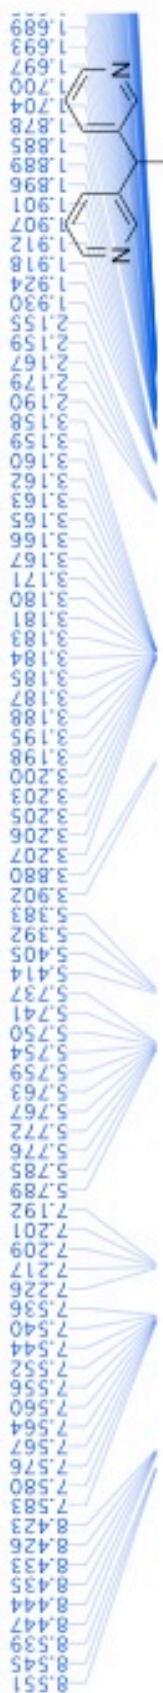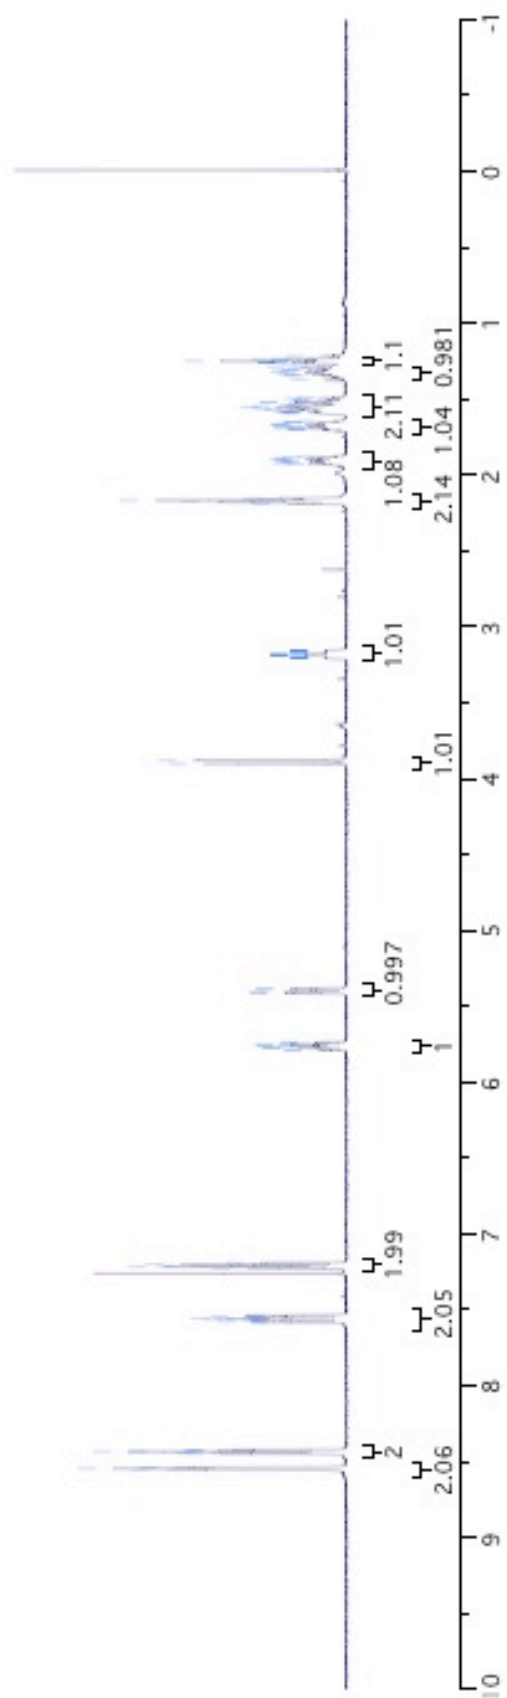

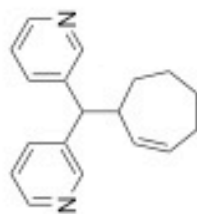

**9dd**

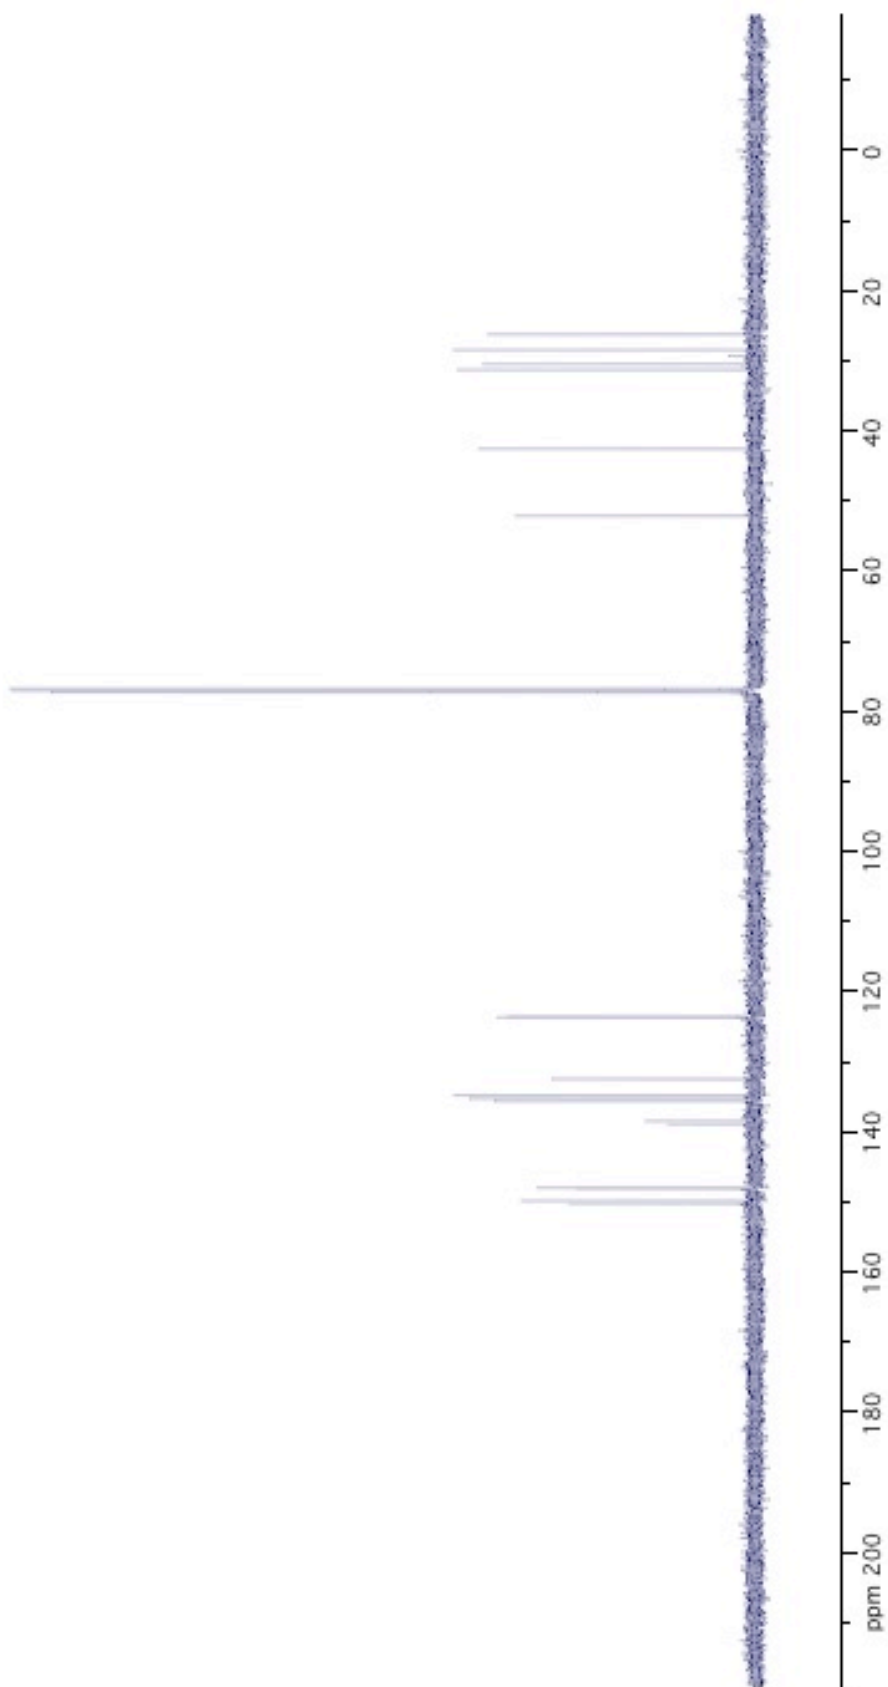

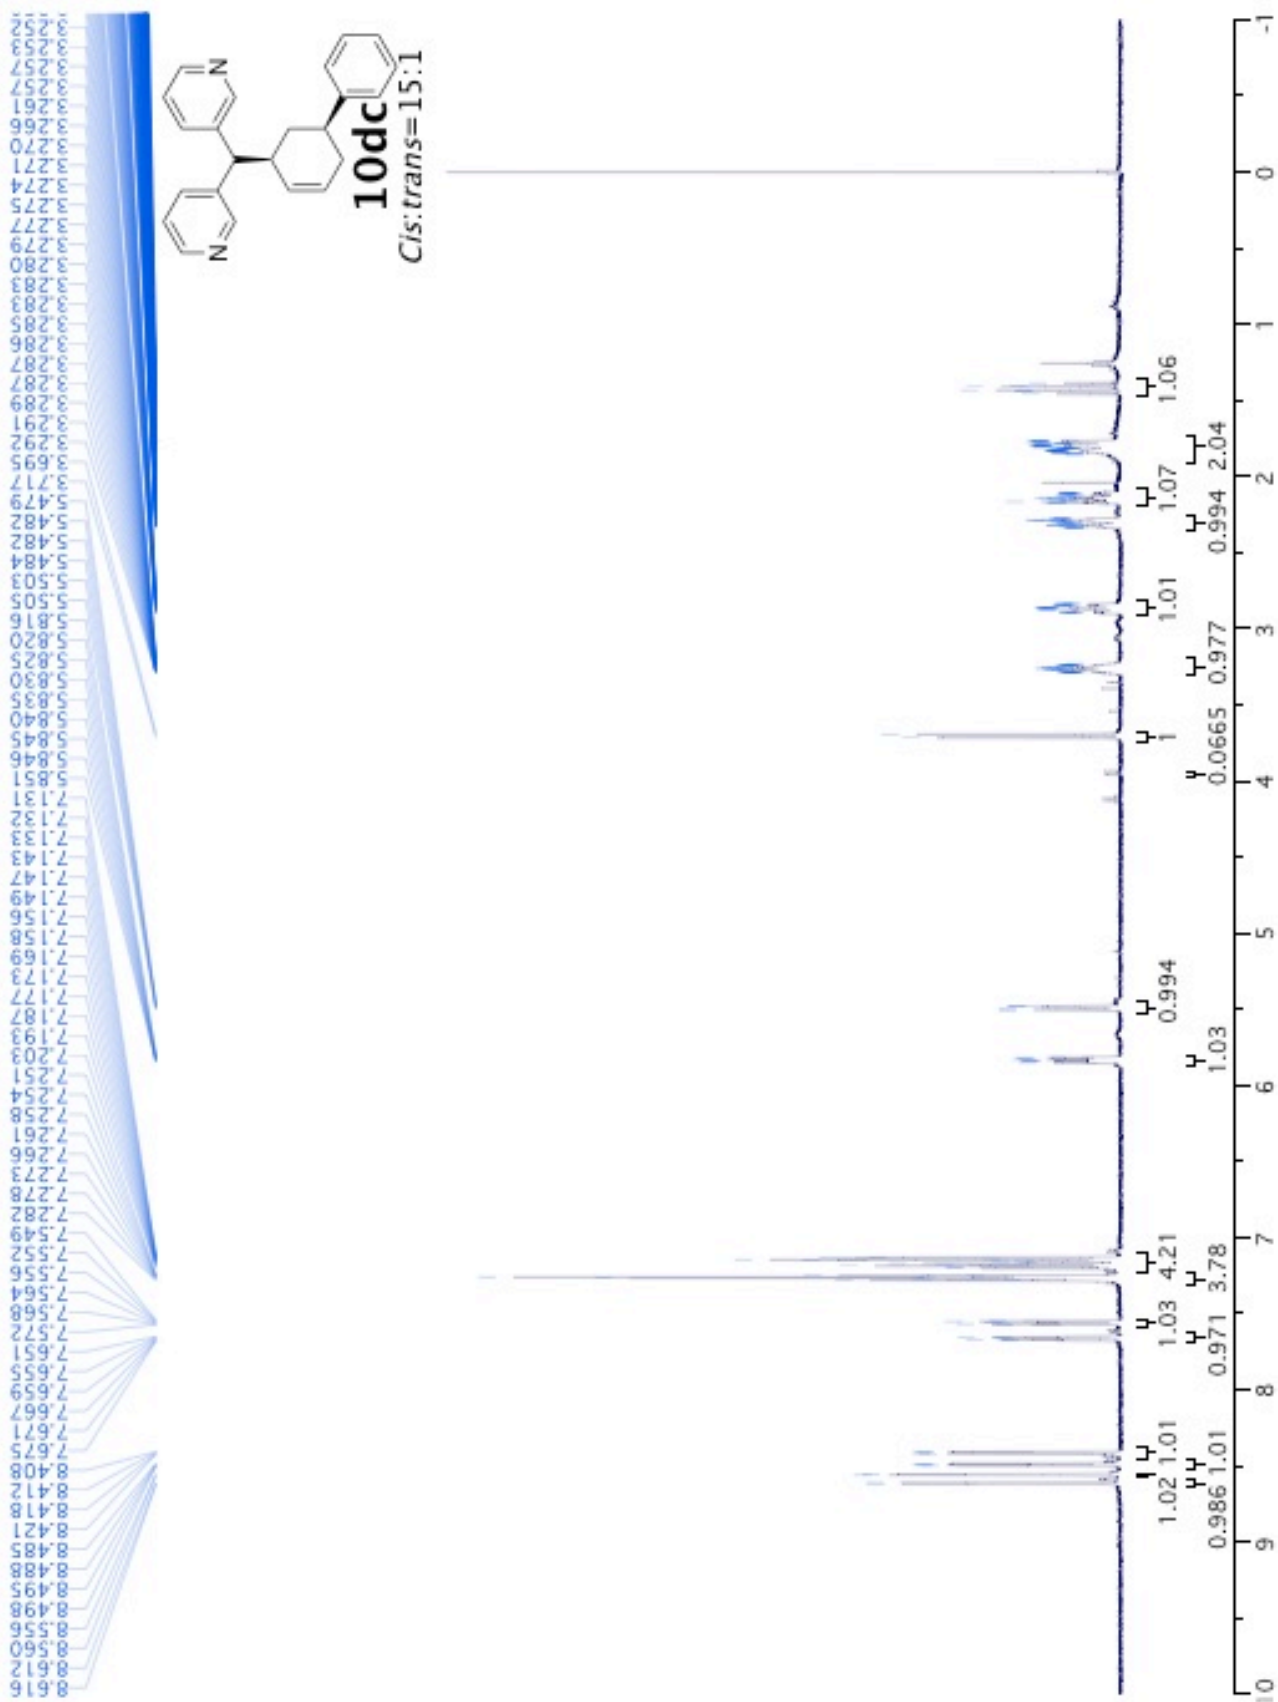

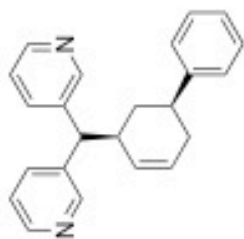

**10dc**

*Cis: trans* = 15:1

33.963  
36.171  
40.468  
40.573

53.193

123.723  
126.321  
126.799  
128.098  
128.511  
129.119  
135.064  
135.516  
137.975  
146.286  
148.217  
148.288  
149.614  
150.090

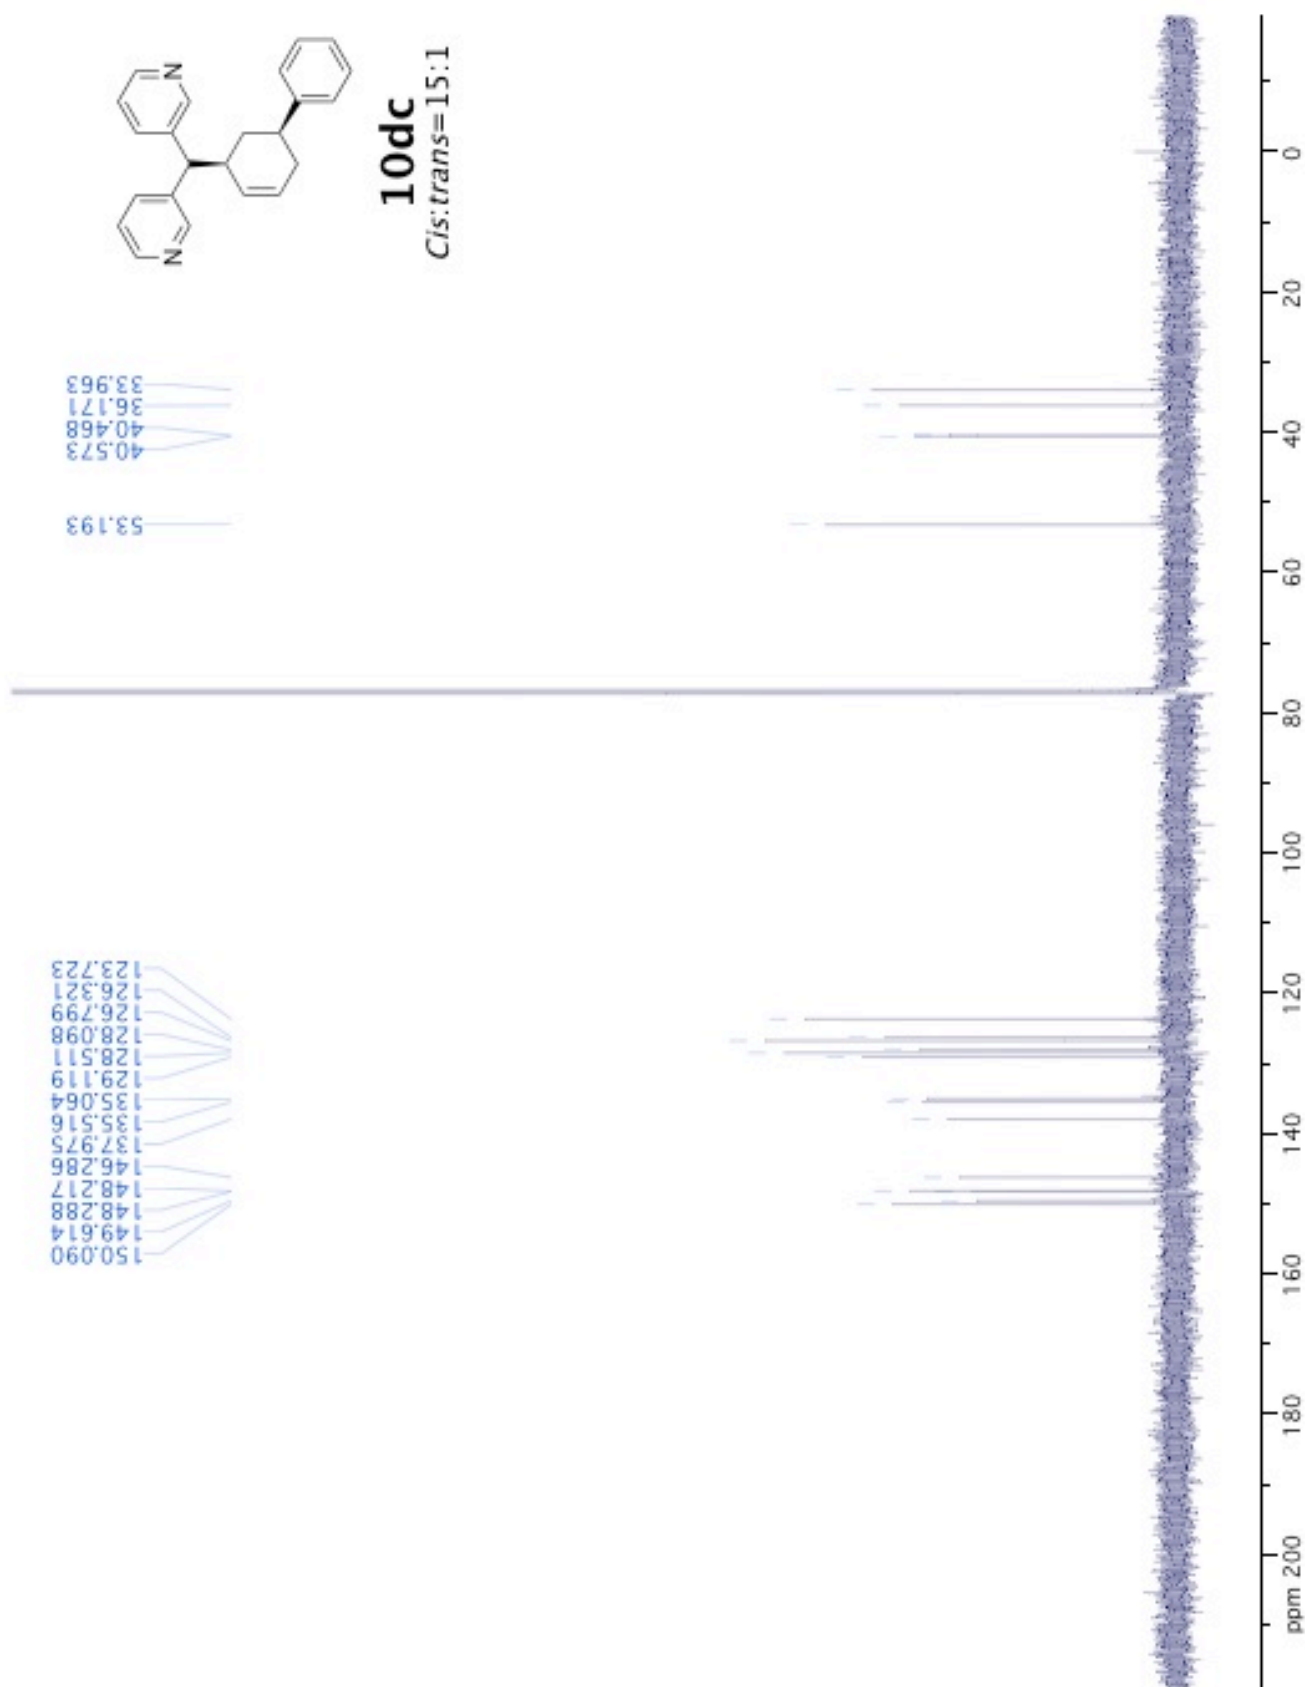

Supplement: NIHMS765615-supplement-Supporting_Information.pdf [file NIHMS765615-supplement-Supporting_Information.pdf]
